# Supplementary material for: Ring-opening cyclization of spirocyclopropanes with stabilized sulfonium ylides for the construction of a chromane skeleton
Source: Royal Society of Chemistry journal article supplement (doi:10.1039/c9cc03023a), 2019-01-01

*Electronic Supplementary Information for*

**Ring-opening cyclization of spirocyclopropanes with stabilized sulfonium ylides for the construction of a chromane skeleton**

Hisanori Nambu,<sup>\*a</sup> Yuta Onuki,<sup>a</sup> Naoki Ono,<sup>a</sup> Kiyoshi Tsuge<sup>b</sup> and Takayuki Yakura<sup>\*a</sup>

<sup>a</sup> Graduate School of Medicine and Pharmaceutical Sciences, University of Toyama, Sugitani, Toyama 930-0194, Japan.

<sup>b</sup> Graduate School of Science and Engineering, University of Toyama, Gofuku, Toyama 930-8555, Japan.

**Contents:**

Experimental section

|                                                                                                                                                                     |         |
|---------------------------------------------------------------------------------------------------------------------------------------------------------------------|---------|
| General                                                                                                                                                             | S2      |
| I. Preparation of stabilized sulfonium ylides                                                                                                                       | S3–S6   |
| II. Ring-opening cyclization of spirocyclopropanes with sulfonium ylides                                                                                            | S7–S12  |
| III. Determination of the stereochemistry of <b>4a</b>                                                                                                              | S13–S14 |
| IV. Synthesis of 5-hydroxychromane <b>12</b>                                                                                                                        | S15     |
| V. X-ray crystallographic data of <b>6</b>                                                                                                                          | S16–S18 |
| References                                                                                                                                                          | S19     |
| <sup>1</sup> H and <sup>13</sup> C NMR spectra of <b>3a–f</b> , <b>5</b> , <b>4a–f</b> , <b>6</b> , <b>8</b> , <b>8'</b> , <b>4g–k</b> , <b>4a'</b> , and <b>12</b> | S20–S42 |

## Experimental section

**General.** Melting points are uncorrected. IR spectra were recorded on a JASCO FT/IR-460 Plus spectrophotometer and absorbance bands are reported in wavenumber ( $\text{cm}^{-1}$ ).  $^1\text{H}$  NMR spectra were recorded on JEOL JNM-ECX400P (400 MHz) spectrometer. Chemical shifts are reported relative to internal standard (tetramethylsilane at  $\delta_{\text{H}}$  0.00 or  $\text{CDCl}_3$  at  $\delta_{\text{H}}$  7.26). Data are presented as follows: chemical shift ( $\delta$ , ppm), multiplicity (s = singlet, d = doublet, t = triplet, q = quartet, quint = quintet, m = multiplet, br = broad), coupling constant and integration.  $^{13}\text{C}$  NMR spectra were recorded on JEOL JNM-ECX400P (100 MHz) spectrometer. The following internal reference was used ( $\text{CDCl}_3$  at  $\delta$  77.0). All  $^{13}\text{C}$  NMR spectra were determined with complete proton decoupling. High-resolution mass spectra were determined with JEOL JMS-GCmate II instrument. Column chromatography was performed on Silica Gel 60 PF<sub>254</sub> (Nacalai Tesque) and Kanto silica gel 60 N (63–210 mesh) under pressure. Analytical thin layer chromatography (TLC) was carried out on Merck Kieselgel 60 F<sub>254</sub> plates. Visualization was accomplished with UV light and phosphomolybdic acid stain solution followed by heating. All reagents, such as methyl sulfide, tetrahydrothiophene, iodine, lithium iodide, lithium carbonate, and potassium carbonate are commercially available and were purchased from suppliers such as Sigma-Aldrich Co.; Wako Pure Chemical Industries, Ltd.; Tokyo Chemical Industry Co., Ltd.; Nacalai Tesque, INC. Dehydrated  $\text{CH}_2\text{Cl}_2$ , acetonitrile, tetrahydrofuran (THF), EtOAc, and *N,N*-dimethylformamide (DMF) were purchased from Wako Pure Chemical Industries, Ltd. and Tokyo Chemical Industry Co., Ltd. Sulfonium bromides **13a–f** were prepared from the corresponding  $\alpha$ -bromocarbonyl compounds with methyl sulfide (for **13a–d**) or tetrahydrothiophene (for **13f**) according to the Ratts' procedure.<sup>1</sup> 1-Phenylspiro[2.5]octane-4,8-dione (**1a**),<sup>2</sup> 1-(4-methylphenyl)spiro[2.5]octane-4,8-dione (**1b**),<sup>2</sup> 1-(4-bromophenyl)spiro[2.5]octane-4,8-dione (**1c**),<sup>2</sup> spiro[2.5]octane-4,8-dione (**1d**),<sup>3</sup> 1-butylspiro[2.5]octane-4,8-dione (**1e**),<sup>4</sup> 6,6-dimethyl-1-phenylspiro[2.5]octane-4,8-dione (**1f**),<sup>2</sup> 1,1-diacetyl-2-phenylcyclopropane (**11a**),<sup>2</sup> and dimethyl 2-phenylcyclopropane-1,1-dicarboxylate (**11b**)<sup>5</sup> were prepared according to literature procedures.

## I. Preparation of stabilized sulfonium ylides

### Typical procedure for preparation of sulfonium ylides with sodium hydride:

#### Dimethylsulfonium benzoylmethylide (**3a**).<sup>1</sup>

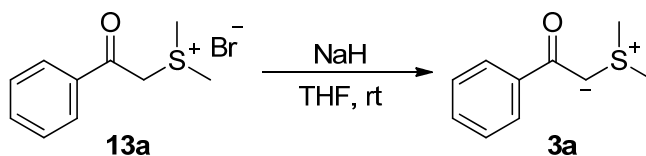

According to the Ratts' procedure,<sup>1</sup> **3a** was prepared from (benzoylmethyl)dimethylsulfonium bromide (**13a**).

NaH (60% dispersion in mineral oil) was washed with two portions of dry hexane to remove the mineral oil and the remaining NaH was dried in vacuo.

Sulfonium salt **13a** (522 mg, 2.00 mmol) was added to a suspension of NaH (53.0 mg, 2.20 mmol) in THF (10 mL) at room temperature. After stirring at this temperature for 12 h, the reaction mixture was filtered through a Celite pad and the filter cake was rinsed with CH<sub>2</sub>Cl<sub>2</sub> (20 mL). The filtrate was concentrated in vacuo, and the crude solid was purified by recrystallization from acetone/hexane to provide **3a** (293 mg, 81%) as a pale yellow solid: mp 55.0–56.0 °C [lit.,<sup>1</sup> mp 56–57 °C]; IR (KBr, cm<sup>-1</sup>)  $\nu$  3072, 2929, 1581, 1507, 1483, 1434, 985, 850, 707, 585; <sup>1</sup>H NMR (400 MHz, CDCl<sub>3</sub>)  $\delta$  7.78–7.76 (m, 2 H), 7.35–7.34 (m, 3H), 4.34 (s, 1H), 2.96 (s, 6H); <sup>13</sup>C NMR (100 MHz, CDCl<sub>3</sub>)  $\delta$  183.0, 140.8, 129.5, 127.8, 126.3, 52.0, 28.5.

#### Dimethylsulfonium 4-methoxybenzoylmethylide (**3b**).

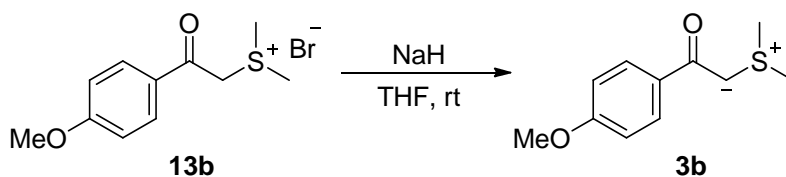

According to the typical procedure for the preparation of sulfonium ylides with sodium hydride, **3b** was prepared from (4-methoxybenzoylmethyl)dimethylsulfonium bromide (**13b**) (582 mg, 2.00 mmol). The crude product was purified by recrystallization from acetone/hexane to provide **3b** (283 mg, 67%) as a pale yellow solid: mp 96.5–97.5 °C; IR (KBr, cm<sup>-1</sup>)  $\nu$  3010, 2928, 1601, 1582, 1515, 1494, 1417, 1392, 1254, 1174, 849, 754, 582; <sup>1</sup>H NMR (400 MHz, CDCl<sub>3</sub>)  $\delta$  7.76 (d,  $J$  = 8.0 Hz, 2H), 6.86 (dt,  $J$  = 9.6, 2.4 Hz, 2H), 4.39 (brs, 1H), 3.82 (s, 3H), 3.00 (s, 6H); <sup>13</sup>C NMR (100 MHz, CDCl<sub>3</sub>)  $\delta$  182.5, 160.9, 132.9, 128.0, 113.0, 55.1, 51.2, 28.4; HRMS (FAB)  $m/z$  calcd for C<sub>11</sub>H<sub>15</sub>O<sub>2</sub>S (M+H)<sup>+</sup> 211.0793, found 211.0785.

**Typical procedure for preparation of sulfonium ylides with potassium carbonate:**

**Dimethylsulfonium 4-chlorobenzoylmethylide (3c).**

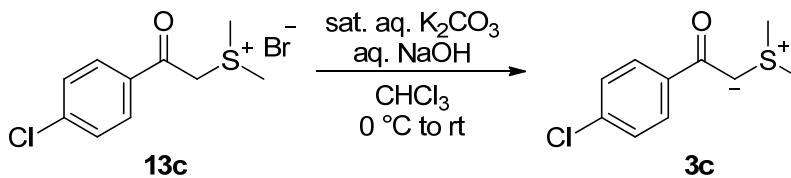

According to the Payne's procedure,<sup>6</sup> **3c** was prepared from (4-chlorobenzoylmethyl)-dimethylsulfonium bromide **13c**.

Saturated aqueous  $\text{K}_2\text{CO}_3$  (1.0 mL) and aqueous NaOH (12.5 M, 0.21 mL) were added to a solution of sulfonium salt **13c** (591 mg, 2.00 mmol) in  $\text{CHCl}_3$  (2.0 mL) at 0 °C. After stirring at this temperature for 10 min, the reaction mixture was warmed to room temperature and stirred for an additional 30 min. The mixture was diluted with  $\text{CH}_2\text{Cl}_2$  (5 mL) and filtered through a Celite pad, and the filter cake was rinsed with  $\text{CH}_2\text{Cl}_2$  (20 mL). The filtrate was concentrated in vacuo, and the residue was purified by recrystallization from acetone/hexane to provide **3c** (351 mg, 82%) as a white solid: mp 117.5–118.5 °C; IR (KBr,  $\text{cm}^{-1}$ )  $\nu$  2993, 2916, 1578, 1508, 1480, 1379, 1192, 1087, 1039, 994, 963, 856, 846, 828, 744, 569;  $^1\text{H}$  NMR (400 MHz,  $\text{CDCl}_3$ )  $\delta$  7.71 (d,  $J$  = 8.4 Hz, 2H), 7.30 (d,  $J$  = 8.4 Hz, 2H), 4.28 (s, 1H), 2.98 (s, 6H);  $^{13}\text{C}$  NMR (100 MHz,  $\text{CDCl}_3$ )  $\delta$  181.6, 139.3, 135.2, 127.9, 127.7, 51.1, 28.3; HRMS (FAB)  $m/z$  calcd for  $\text{C}_{10}\text{H}_{12}\text{OClS}$  ( $\text{M}+\text{H}$ ) $^+$ : 215.0297, found 215.0300.

**Dimethylsulfonium 4-nitrobenzoylmethylide (3d).<sup>1</sup>**

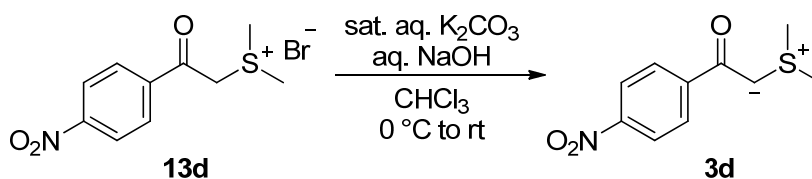

According to the typical procedure for the preparation of sulfonium ylides with potassium carbonate, **3d** was prepared from dimethyl(4-nitrobenzoylmethyl)sulfonium bromide (**13d**) (612 mg, 2.00 mmol). The crude product was purified by recrystallization from acetone/hexane to provide **3d** (304 mg, 67%) as a brown solid: mp 112.0 °C (decomp.) [lit.,<sup>1</sup> mp 105 °C (decomp.)]; IR (KBr,  $\text{cm}^{-1}$ )  $\nu$  3055, 2923, 1537, 1506, 1404, 1344, 1093, 874, 837, 717;  $^1\text{H}$  NMR (400 MHz,  $\text{CDCl}_3$ )  $\delta$  8.19 (d,  $J$  = 7.2 Hz, 2 H), 7.90 (d,  $J$  = 7.2 Hz, 2H), 4.40 (s, 1H), 3.03 (s, 6H);  $^{13}\text{C}$  NMR (100 MHz,  $\text{CDCl}_3$ )  $\delta$  179.9, 148.2, 146.7, 127.1, 123.1, 53.7, 28.0.

**Tetrahydrothiophenium acetylmethylide (3e).**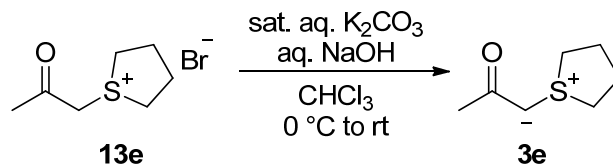

According to the typical procedure for the preparation of sulfonium ylides with potassium carbonate, **3e** was prepared from (acetylmethyl)tetrahydrothiophenium bromide (**13e**) (450 mg, 2.00 mmol). The crude product **3d** (282 mg, ca. 98%), which was used in the next step without further purification, was obtained as a yellow oil: IR (film, cm<sup>-1</sup>)  $\nu$  2950, 1660, 1530, 1433, 1385, 1175, 985, 835, 577; <sup>1</sup>H NMR (400 MHz, CDCl<sub>3</sub>)  $\delta$  3.68 (s, 1H), 3.34–3.28 (m, 2H), 3.12–3.06 (m, 2H), 2.64–2.54 (m, 2H), 2.04–1.92 (m, 2H), 1.89 (s, 3H); <sup>13</sup>C NMR (100 MHz, CDCl<sub>3</sub>)  $\delta$  185.8, 54.0, 44.0, 27.9, 26.8; HRMS (FAB)  $m/z$  calcd for C<sub>7</sub>H<sub>13</sub>OS (M+H)<sup>+</sup>: 145.0687, found 145.0687.

**Dimethylsulfonium pivaloylmethylide (3f).<sup>7</sup>**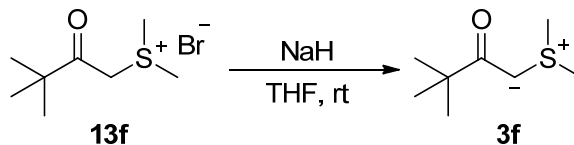

According to the typical procedure for the preparation of sulfonium ylides with sodium hydride, **3f** was prepared from dimethyl(pivaloylmethyl)sulfonium bromide (**13f**) (482 mg, 2.00 mmol). The crude product was purified by recrystallization from acetone/hexane to provide **3f** (248 mg, 77%) as a white solid: mp 116.0–117.0 °C [lit.,<sup>7</sup> mp 115.5–116 °C]; IR (KBr, cm<sup>-1</sup>)  $\nu$  2952, 1681, 1493, 1427, 1352, 1220, 1137, 1037, 990, 847, 605; <sup>1</sup>H NMR (400 MHz, CDCl<sub>3</sub>)  $\delta$  3.76 (s, 1H), 2.86 (s, 6H), 1.10 (s, 9H); <sup>13</sup>C NMR (100 MHz, CDCl<sub>3</sub>)  $\delta$  198.1, 47.8, 40.4, 28.6, 28.3.

**Dimethylsulfonium ethoxycarbonylmethylide (5).<sup>6</sup>**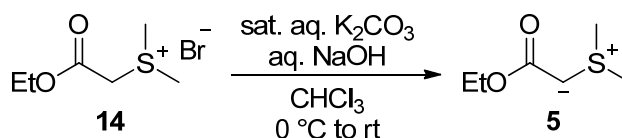

According to the typical procedure for the preparation of sulfonium ylides with potassium carbonate, **5** was prepared from (ethoxycarbonylmethyl)dimethylsulfonium bromide (**14**)<sup>8</sup> (458 mg, 2.00 mmol). The crude product **5** (263 mg, ca. 89%), which was used in the next step without further purification, was obtained as a yellow oil: IR (film, cm<sup>-1</sup>)  $\nu$  2978, 1605, 1371,

1330, 1138, 1065, 998, 883, 757, 554;  $^1\text{H}$  NMR (400 MHz,  $\text{CDCl}_3$ )  $\delta$  4.05 (q,  $J$  = 6.8 Hz, 2H), 2.92 (s, 1H), 2.77 (s, 6H), 1.23 (t,  $J$  = 6.8 Hz, 3H);  $^{13}\text{C}$  NMR (100 MHz,  $\text{CDCl}_3$ )  $\delta$  170.2, 57.8, 31.5, 30.3, 14.8.

**Dimethylsulfonium cyanomethylide (7).**

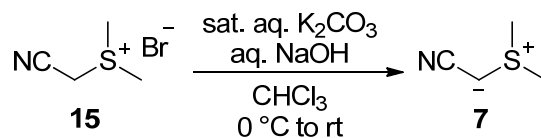

According to the typical procedure for the preparation of sulfonium ylides with potassium carbonate, **7** was prepared from (cyanomethyl)dimethylsulfonium bromide (**15**)<sup>9</sup> (364 mg, 2.00 mmol). The crude product **7** (185 mg, ca. 92%), which was immediately used in the next step without further purification, was obtained as an orange oil. The spectroscopic data of **7** could not be obtained due to an unstable compound.

## II. Ring-opening cyclization of spirocyclopropanes with sulfonium ylides

Typical procedure for the ring-opening cyclization of spirocyclopropane **1a** with sulfonium ylide **3a** (Table 1, entry 3):

*rac*-(2*R*,3*S*)-2-Benzoyl-3-phenyl-2,3,4,6,7,8-hexahydro-5*H*-1-benzopyran-5-one (**4a**).

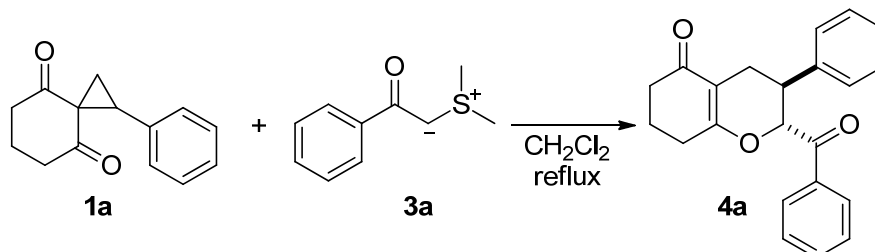

1-Phenylspiro[2.5]octane-4,8-dione (**1a**)<sup>2</sup> (64 mg, 0.30 mmol) was added to a solution of **3a** (81 mg, 0.45 mmol) in  $\text{CH}_2\text{Cl}_2$  (0.75 mL) at room temperature. After stirring at reflux for 7 h, the reaction was cooled to room temperature and quenched by addition of water (3 mL), and the resulting mixture was extracted with EtOAc (3 x 10 mL). The combined organic layers were washed with brine (10 mL) and dried over anhydrous  $\text{MgSO}_4$ . Filtration and evaporation in vacuo furnished the crude product, which was purified by column chromatography (silica gel, 40% EtOAc in hexane) to provide **4a** (95 mg, 95%) as a white solid: mp 109.0–110.0 °C; IR (KBr,  $\text{cm}^{-1}$ )  $\nu$  2942, 1686, 1650, 1628, 1597, 1450, 1393, 1224, 1187, 975, 757, 699;  $^1\text{H}$  NMR (400 MHz,  $\text{CDCl}_3$ )  $\delta$  7.82 (d,  $J$  = 7.6 Hz, 2 H), 7.56 (t,  $J$  = 7.6 Hz, 1H), 7.42 (t,  $J$  = 7.6 Hz, 2H), 7.24–7.15 (m, 5H), 5.53 (d,  $J$  = 6.8 Hz, 1H), 3.50 (q,  $J$  = 6.8 Hz, 1H), 2.58–2.45 (m, 4H), 2.44–2.37 (m, 2H), 2.07–1.97 (m, 2H);  $^{13}\text{C}$  NMR (100 MHz,  $\text{CDCl}_3$ )  $\delta$  197.8, 195.1, 170.2, 140.1, 134.9, 133.6, 128.7, 128.6, 128.5, 127.6, 127.2, 111.0, 80.2, 39.2, 36.6, 28.2, 22.9, 20.8; HRMS (FAB)  $m/z$  calcd for  $\text{C}_{22}\text{H}_{21}\text{O}_3$  ( $\text{M}+\text{H}$ )<sup>+</sup> 333.1491, found 333.1501.

*rac*-(2*R*,3*S*)-2-(4-Methoxyphenyl)-3-phenyl-2,3,4,6,7,8-hexahydro-5*H*-1-benzopyran-5-one (**4b**) (Table 2, entry 1).

According to the typical procedure for the ring-opening cyclization of **1a** with **3a**, **4b** was prepared from **1a** (64 mg, 0.30 mmol) with **3b** (95 mg, 0.45 mmol) for 4.5 h. The crude product was purified by column chromatography (silica gel, 4:3.5:2.5 EtOAc/hexane/ $\text{CH}_2\text{Cl}_2$ ) to provide **4b** (102 mg, 94%) as a white solid: mp 75.0–76.5 °C; IR (KBr,  $\text{cm}^{-1}$ )  $\nu$

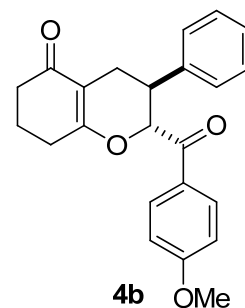

2936, 1686, 1634, 1603, 1575, 1383, 1262, 1173, 1023, 975, 749;  $^1\text{H}$  NMR (400 MHz,  $\text{CDCl}_3$ )  $\delta$  7.83 (dt,  $J$  = 8.8, 2.0 Hz, 2H), 7.26–7.14 (m, 5H), 6.89 (dt,  $J$  = 8.8, 2.0 Hz, 2H), 5.49 (d,  $J$  = 6.4 Hz, 1H), 3.85 (s, 3H), 3.49 (q,  $J$  = 6.4 Hz, 1H), 2.61–2.47 (m, 4H), 2.42 (td,  $J$  = 6.4, 3.2 Hz, 2H),

2.05–1.98 (m, 2H);  $^{13}\text{C}$  NMR (100 MHz,  $\text{CDCl}_3$ )  $\delta$  197.8, 193.3, 170.3, 163.9, 140.2, 131.0, 128.7, 127.8, 127.6, 127.2, 113.9, 111.0, 79.9, 55.5, 39.3, 36.7, 28.3, 23.1, 20.8; HRMS (FAB)  $m/z$  calcd for  $\text{C}_{23}\text{H}_{23}\text{O}_4$  ( $\text{M}+\text{H}$ ) $^+$  363.1596, found 363.1599.

***rac*-(2*R*,3*S*)-2-(4-Chlorophenyl)-3-phenyl-2,3,4,6,7,8-hexahydro-5*H*-1-benzopyran-5-one (4c) (Table 2, entry 2).**

According to the typical procedure for the ring-opening cyclization of **1a** with **3a**, **4c** was prepared from **1a** (64 mg, 0.30 mmol) with **3c** (97 mg, 0.45 mmol) for 9.5 h. The crude product was purified by column chromatography (silica gel, 40% EtOAc in hexane) to provide **4c** (102 mg, 93%) as a white solid: mp 118.5–120.0 °C; IR (KBr,  $\text{cm}^{-1}$ )  $\nu$  2939, 1683, 1651, 1629, 1591, 1390, 1224, 1190, 1092, 977, 762, 700;  $^1\text{H}$  NMR (400 MHz,  $\text{CDCl}_3$ )  $\delta$  7.75 (d,  $J$  = 8.0 Hz, 2H), 7.38 (d,  $J$  = 8.0 Hz, 2H), 7.23 (t,  $J$  = 7.2 Hz, 2H), 7.16 (t,  $J$  = 7.2 Hz, 3H), 5.42 (d,  $J$  = 6.8 Hz, 1H), 3.45 (q,  $J$  = 6.8 Hz, 1H), 2.65–2.47 (m, 4H), 2.42 (dd,  $J$  = 6.4, 4.8 Hz, 2H), 2.02 (quint,  $J$  = 6.4 Hz, 2H);  $^{13}\text{C}$  NMR (100 MHz,  $\text{CDCl}_3$ )  $\delta$  197.7, 194.1, 169.9, 140.2, 139.7, 133.3, 130.0, 128.9, 128.8, 127.7, 127.4, 111.2, 80.2, 39.5, 36.6, 28.2, 23.3, 20.7; HRMS (FAB)  $m/z$  calcd for  $\text{C}_{22}\text{H}_{20}\text{O}_3\text{Cl}$  ( $\text{M}+\text{H}$ ) $^+$  367.1101, found 367.1105.

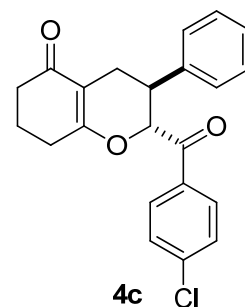

***rac*-(2*R*,3*S*)-2-(4-Nitrophenyl)-3-phenyl-2,3,4,6,7,8-hexahydro-5*H*-1-benzopyran-5-one (4d) (Table 2, entry 4).**

According to the typical procedure for the ring-opening cyclization of **1a** with **3a**, **4d** was prepared from **1a** (64 mg, 0.30 mmol) with **3d** (203 mg, 0.90 mmol) for 48 h. The crude product was purified by column chromatography (silica gel, 40% EtOAc in hexane) to provide **4d** (93 mg, 82%) as a pale yellow solid: mp 165.0–166.5 °C; IR (KBr,  $\text{cm}^{-1}$ )  $\nu$  2935, 1705, 1634, 1604, 1523, 1395, 1350, 1212, 1098, 843, 693;  $^1\text{H}$  NMR (400 MHz,  $\text{CDCl}_3$ )  $\delta$  8.23 (d,  $J$  = 8.8 Hz, 2H), 7.92 (d,  $J$  = 8.8 Hz, 2H), 7.22 (t,  $J$  = 7.2 Hz, 2H), 7.18–7.13 (m, 3H), 5.40 (d,  $J$  = 8.0 Hz, 1H), 3.43 (q,  $J$  = 8.0 Hz, 1H), 2.69 (dd,  $J$  = 17.2, 6.0 Hz, 1H), 2.59–2.51 (m, 3H), 2.43 (t,  $J$  = 6.8 Hz, 2H), 2.03 (quint,  $J$  = 6.4 Hz, 2H);  $^{13}\text{C}$  NMR (100 MHz,  $\text{CDCl}_3$ )  $\delta$  197.6, 194.5, 169.5, 150.3, 139.8, 139.0, 129.6, 128.9, 127.7, 127.6, 123.7, 111.6, 80.6, 39.9, 36.6, 28.2, 23.7, 20.7; HRMS (FAB)  $m/z$  calcd for  $\text{C}_{22}\text{H}_{20}\text{O}_5\text{N}$  ( $\text{M}+\text{H}$ ) $^+$  378.1341, found 378.1347.

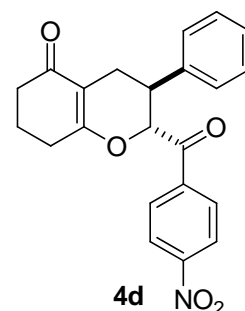



***rac*-(2*R*,3*S*)-2-Acetyl-3-phenyl-2,3,4,6,7,8-hexahydro-5*H*-1-benzopyran-5-one (4e) (Table 2, entry 5).**

According to the typical procedure for the ring-opening cyclization of **1a** with **3a**, **4e** was prepared from **1a** (64 mg, 0.30 mmol) with **3e** (65 mg, 0.45 mmol) for 24 h. The crude product was purified by column chromatography (silica gel, 40% EtOAc in hexane) to provide **4e** (72 mg, 89%) as a white solid: mp 88.0–89.0 °C; IR (KBr, cm<sup>-1</sup>)  $\nu$  2935, 1719, 1652, 1631, 1604, 1385, 1351, 1212, 1182, 1134, 1014, 764, 707; <sup>1</sup>H NMR (400 MHz, CDCl<sub>3</sub>)  $\delta$  7.32 (t, *J* = 7.2 Hz, 2H), 7.25 (t, *J* = 7.2 Hz, 1H), 7.17 (d, *J* = 7.2 Hz, 2H), 4.56 (d, *J* = 7.2 Hz, 1H), 3.25 (q, *J* = 7.2 Hz, 1H), 2.62–2.46 (m, 4H), 2.41 (t, *J* = 6.4 Hz, 2H), 2.05 (s, 3H), 2.03–1.99 (m, 2H); <sup>13</sup>C NMR (100 MHz, CDCl<sub>3</sub>)  $\delta$  204.5, 197.6, 169.5, 139.5, 128.8, 127.5, 127.4, 111.4, 84.5, 39.4, 36.5, 28.1, 26.8, 23.8, 20.7; HRMS (FAB) *m/z* calcd for C<sub>17</sub>H<sub>19</sub>O<sub>3</sub> (M+H)<sup>+</sup> 271.1334, found 271.1339.

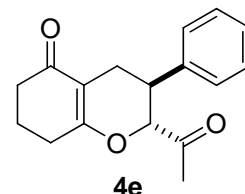

***rac*-(2*R*,3*S*)-2-Pivaloyl-3-phenyl-2,3,4,6,7,8-hexahydro-5*H*-1-benzopyran-5-one (4f) (Table 2, entry 6).**

According to the typical procedure for the ring-opening cyclization of **1a** with **3a**, **4f** was prepared from **1a** (64 mg, 0.30 mmol) with **3f** (72 mg, 0.45 mmol) for 2 h. The crude product was purified by column chromatography (silica gel, 40% EtOAc in hexane) to provide **4f** (79 mg, 84%) as a colorless oil: IR (film, cm<sup>-1</sup>)  $\nu$  2969, 1717, 1654, 1631, 1388, 1187, 976, 755, 701; <sup>1</sup>H NMR (400 MHz, CDCl<sub>3</sub>)  $\delta$  7.28 (t, *J* = 7.2 Hz, 2H), 7.21 (t, *J* = 7.2 Hz, 1H), 7.16 (d, *J* = 7.2 Hz, 2H), 4.85 (d, *J* = 9.6 Hz, 1H), 3.31 (td, *J* = 9.6, 5.6 Hz, 1H), 2.72 (dd, *J* = 16.4, 5.6 Hz, 1H), 2.52–2.35 (m, 5H), 2.00 (quint, *J* = 6.0 Hz, 2H), 0.87 (s, 9H); <sup>13</sup>C NMR (100 MHz, CDCl<sub>3</sub>)  $\delta$  209.5, 197.8, 170.2, 146.5, 139.0, 128.6, 127.4, 111.4, 77.4, 44.1, 39.0, 36.6, 28.2, 25.2, 23.5, 20.8; HRMS (FAB) *m/z* calcd for C<sub>20</sub>H<sub>25</sub>O<sub>3</sub> (M+H)<sup>+</sup>: 313.1804, found 313.1811.

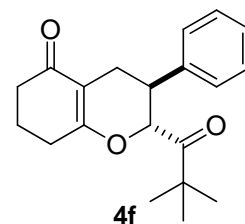

***rac*-(2*R*,3*S*)-2-Ethoxycarbonyl-3-phenyl-2,3,4,6,7,8-hexahydro-5*H*-1-benzopyran-5-one (6) (Scheme 2).**

According to the typical procedure for the ring-opening cyclization of **1a** with **3a**, **6** was prepared from **1a** (64 mg, 0.30 mmol) with **5** (67 mg, 0.45 mmol) for 1 h. The crude product was purified by column chromatography (silica gel, 40% EtOAc in hexane) to provide **6** (87 mg, 97%) as a white solid: mp 76.5–77.5 °C; IR (KBr, cm<sup>-1</sup>)  $\nu$  2937, 1746, 1649, 1626, 1388, 1210, 1188, 1069, 1034, 765,

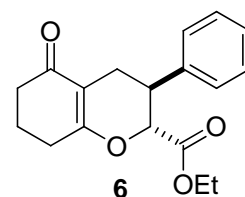

743, 705;  $^1\text{H}$  NMR (400 MHz,  $\text{CDCl}_3$ )  $\delta$  7.31 (t,  $J = 7.2$  Hz, 2H), 7.25 (t,  $J = 7.2$  Hz, 1H), 7.19 (d,  $J = 7.2$  Hz, 2H), 4.59 (d,  $J = 7.6$  Hz, 1H), 4.02 (q,  $J = 7.2$  Hz, 2H), 3.27 (q,  $J = 7.6$  Hz, 1H), 2.62 (dd,  $J = 17.6, 5.6$  Hz, 1H), 2.55–2.46 (m, 3H), 2.41 (td,  $J = 6.4, 2.8$  Hz, 2H), 2.01 (quint,  $J = 6.4$  Hz, 2H), 1.00 (t,  $J = 7.2$  Hz, 3H);  $^{13}\text{C}$  NMR (100 MHz,  $\text{CDCl}_3$ )  $\delta$  197.6, 169.7, 168.8, 139.3, 128.5, 127.6, 127.3, 111.3, 79.0, 61.3, 40.2, 36.5, 28.0, 23.7, 20.6, 13.6; HRMS (FAB)  $m/z$  calcd for  $\text{C}_{18}\text{H}_{21}\text{O}_4$  ( $\text{M}+\text{H}$ ) $^+$ : 301.1440, found 301.1448.

***rac*-(2*R*,3*S*)-2-Cyano-3-phenyl-2,3,4,6,7,8-hexahydro-5*H*-1-benzopyran-5-one (8) and *rac*-(2*R*,3*R*)-isomer 8' (Scheme 2).**

According to the typical procedure for the ring-opening cyclization of **1a** with **3a**, **8** and **8'** was prepared from **1a** (64 mg, 0.30 mmol) with **7** (46 mg, 0.45 mmol) for 4.5 h. The crude product was purified by column chromatography (silica gel, 30% EtOAc in hexane) to provide **8** (53 mg, 70%) as a white solid and **8'** (16 mg, 21%) as a colorless oil.

**8**: mp 159.0–160.0 °C; IR (KBr,  $\text{cm}^{-1}$ )  $\nu$  2923, 2363, 1698, 1657, 1636, 1456, 1385, 1239, 1213, 1184, 1133, 1065, 1036, 762, 702;  $^1\text{H}$  NMR (400 MHz,  $\text{CDCl}_3$ )  $\delta$  7.41–7.32 (m, 3H), 7.22 (d,  $J = 6.8$  Hz, 2H), 4.77 (d,  $J = 8.8$  Hz, 1H), 3.23 (td,  $J = 8.8$  Hz, 6.0 Hz, 1H), 2.84 (m, 1H), 2.56–2.37 (m, 5H), 2.03 (quint,  $J = 6.0$  Hz, 2H);  $^{13}\text{C}$  NMR (100 MHz,  $\text{CDCl}_3$ )  $\delta$  197.3, 168.1, 137.4, 129.2, 128.4, 127.6, 115.8, 111.9, 68.9, 41.3, 36.4, 27.8, 23.9, 20.6; HRMS (FAB)  $m/z$  calcd for  $\text{C}_{16}\text{H}_{16}\text{O}_2\text{N}$  ( $\text{M}+\text{H}$ ) $^+$  254.1181, found 254.1179.

**8'**: IR (film,  $\text{cm}^{-1}$ )  $\nu$  2928, 2360, 1661, 1638, 1385, 1266, 1184, 1068, 1027, 739, 704;  $^1\text{H}$  NMR (400 MHz,  $\text{CDCl}_3$ )  $\delta$  7.43–7.34 (m, 5H), 5.08 (dd,  $J = 4.0, 1.6$  Hz, 1H), 3.29 (ddd,  $J = 10.4, 6.4, 4.0$  Hz, 1H), 2.82–2.69 (m, 2H), 2.57–2.43 (m, 4H), 2.17–1.95 (m, 2H);  $^{13}\text{C}$  NMR (100 MHz,  $\text{CDCl}_3$ )  $\delta$  197.5, 167.3, 135.8, 129.2, 128.5, 127.8, 112.5, 99.9, 68.8, 39.9, 36.5, 27.8, 20.6, 20.3; HRMS (FAB)  $m/z$  calcd for  $\text{C}_{16}\text{H}_{16}\text{O}_2\text{N}$  ( $\text{M}+\text{H}$ ) $^+$  254.1181, found 254.1177.

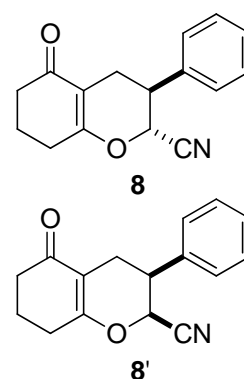

***rac*-(2*R*,3*S*)-2-Benzoyl-3-(4-methylphenyl)-2,3,4,6,7,8-hexahydro-5*H*-1-benzopyran-5-one (4g) (Table 3, entry 1).**

According to the typical procedure for the ring-opening cyclization of **1a** with **3a**, **4g** was prepared from **1b**<sup>2</sup> (68 mg, 0.30 mmol) with **3a** (81 mg, 0.45 mmol) for 6 h. The crude product was purified by

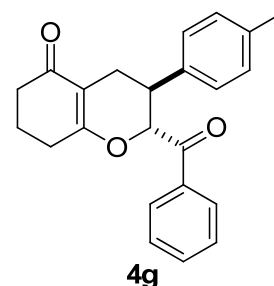

column chromatography (silica gel, 30% EtOAc in hexane) to provide **4g** (92 mg, 89%) as a white solid: mp 98.0–99.0 °C; IR (KBr,  $\text{cm}^{-1}$ )  $\nu$  2945, 1694, 1652, 1632, 1597, 1516, 1448, 1387, 1215, 1185, 1098, 974, 691;  $^1\text{H}$  NMR (400 MHz,  $\text{CDCl}_3$ )  $\delta$  7.83 (d,  $J = 7.6$  Hz, 2H), 7.55 (t,  $J = 7.6$  Hz, 1H), 7.42 (t,  $J = 7.6$  Hz, 2H), 7.08–7.03 (m, 4H), 5.51 (d,  $J = 6.0$  Hz, 1H), 3.47 (q,  $J = 6.0$  Hz, 1H), 2.59–2.46 (m, 4H), 2.41 (td,  $J = 6.4, 2.8$  Hz, 2H), 2.25 (s, 3H), 2.00 (quint,  $J = 6.4$  Hz, 2H);  $^{13}\text{C}$  NMR (100 MHz,  $\text{CDCl}_3$ )  $\delta$  197.8, 195.2, 170.2, 137.0, 136.8, 134.9, 133.6, 129.4, 128.7, 128.6, 127.4, 111.0, 80.5, 38.7, 36.6, 28.2, 22.9, 20.9, 20.8; HRMS (FAB)  $m/z$  calcd for  $\text{C}_{23}\text{H}_{23}\text{O}_3$  ( $\text{M}+\text{H}^+$ ): 347.1647, found 347.1648.

***rac*-(2*R*,3*S*)-2-Benzoyl-3-(4-bromophenyl)-2,3,4,6,7,8-hexahydro-5*H*-1-benzopyran-5-one (**4h**) (Table 3, entry 2).**

According to the typical procedure for the ring-opening cyclization of **1a** with **3a**, **4h** was prepared from **1c**<sup>2</sup> (88 mg, 0.30 mmol) with **3a** (81 mg, 0.45 mmol) for 13 h. The crude product was purified by column chromatography (silica gel, 30% EtOAc in hexane) to provide **4h** (114 mg, 93%) as a colorless oil: IR (film,  $\text{cm}^{-1}$ )  $\nu$  2946,

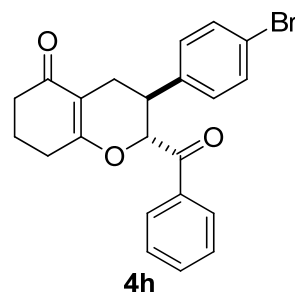

1695, 1652, 1632, 1597, 1489, 1448, 1388, 1215, 1185, 1097, 1009, 975, 756;  $^1\text{H}$  NMR (400 MHz,  $\text{CDCl}_3$ )  $\delta$  7.83 (dt,  $J = 7.2, 1.6$  Hz, 2H), 7.58 (tt,  $J = 7.2, 1.6$  Hz, 1H), 7.45 (m, 2H), 7.36 (dt,  $J = 8.8, 2.0$  Hz, 2H), 7.06 (dt,  $J = 8.8, 2.0$  Hz, 2H), 5.47 (d,  $J = 6.4$  Hz, 1H), 3.48 (q,  $J = 6.4$  Hz, 1H), 2.60–2.46 (m, 4H), 2.42 (td,  $J = 6.4, 1.6$  Hz, 2H), 2.01 (quint,  $J = 6.4$  Hz, 2H);  $^{13}\text{C}$  NMR (100 MHz,  $\text{CDCl}_3$ )  $\delta$  197.7, 194.7, 170.1, 139.2, 134.7, 133.8, 131.8, 129.3, 128.8, 128.6, 121.1, 110.8, 79.9, 38.5, 36.6, 28.2, 22.9, 20.7; HRMS (FAB)  $m/z$  calcd for  $\text{C}_{22}\text{H}_{20}\text{O}_3\text{Br}$  ( $\text{M}+\text{H}^+$ ): 411.0596, found 411.0590.

**2-Benzoyl-2,3,4,6,7,8-hexahydro-5*H*-1-benzopyran-5-one (**4i**) (Table 3, entry 4).**

According to the typical procedure for the ring-opening cyclization of **1a** with **3a**, **4i** was prepared from **1d**<sup>3</sup> (41 mg, 0.30 mmol) with **3a** (81 mg, 0.45 mmol) in refluxing  $\text{CH}_3\text{CN}$  (0.75 mL) for 8 h. The crude product was purified by column chromatography (silica gel, 35% EtOAc in hexane) to provide **4i** (70 mg, 91%) as a white solid: mp 84.0–85.0 °C; IR (KBr,

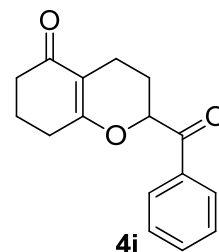

$\text{cm}^{-1}$ )  $\nu$  2939, 1698, 1648, 1621, 1597, 1400, 1232, 1189, 1101, 1003, 778, 702;  $^1\text{H}$  NMR (400 MHz,  $\text{CDCl}_3$ )  $\delta$  7.94–7.91 (m, 2H), 7.62 (tt,  $J = 7.2, 1.6$  Hz, 1H), 7.53–7.48 (m, 2H), 5.47 (dd,  $J = 6.8, 3.6$  Hz, 1H), 2.58–2.30 (m, 5H), 2.26–2.17 (m, 2H), 2.09 (m, 1H), 1.99 (quint,  $J = 6.4$  Hz,

2H);  $^{13}\text{C}$  NMR (100 MHz,  $\text{CDCl}_3$ )  $\delta$  197.9, 195.4, 170.5, 134.1, 133.8, 128.8, 128.5, 111.4, 77.4, 36.6, 28.4, 24.1, 20.8, 16.0; HRMS (FAB)  $m/z$  calcd for  $\text{C}_{16}\text{H}_{17}\text{O}_3$  ( $\text{M}+\text{H}$ ) $^+$ : 257.1178, found 257.1177.

***rac*-(2*R*,3*S*)-2-Benzoyl-3-butyl-2,3,4,6,7,8-hexahydro-5*H*-1-benzopyran-5-one (4j) (Table 3, entry 5).**

According to the typical procedure for the ring-opening cyclization of **1a** with **3a**, **4j** was prepared from **1e**<sup>4</sup> (58 mg, 0.30 mmol) with **3a** (81 mg, 0.45 mmol) for 24 h. The crude product was purified by column chromatography (silica gel, 35% EtOAc in hexane) to provide **4j** (21 mg, 22%) as a colorless oil and starting material **1e** (37 mg, 64%) was

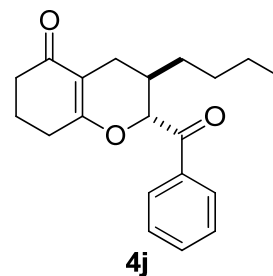

recovered. **4j**: IR (film,  $\text{cm}^{-1}$ )  $\nu$  2930, 1697, 1652, 1628, 1597, 1448, 1393, 1216, 1131, 1086, 971, 755, 695;  $^1\text{H}$  NMR (400 MHz,  $\text{CDCl}_3$ )  $\delta$  7.89 (dd,  $J = 7.2, 1.2$  Hz, 2H), 7.62 (tt,  $J = 7.2, 1.2$  Hz, 1H), 7.50 (t,  $J = 7.2$  Hz, 2H), 5.31 (d,  $J = 4.0$  Hz, 1H), 2.58–2.38 (m, 4H), 2.27 (m, 1H), 2.11 (d,  $J = 5.2$  Hz, 2H), 2.04–1.96 (m, 2H), 1.47–1.28 (m, 6H), 0.89 (t,  $J = 7.2$  Hz, 3H);  $^{13}\text{C}$  NMR (100 MHz,  $\text{CDCl}_3$ )  $\delta$  198.3, 195.7, 170.0, 134.5, 133.7, 128.9, 128.5, 109.9, 80.7, 36.7, 33.0, 31.6, 29.1, 28.2, 22.6, 20.8, 20.4, 13.9; HRMS (FAB)  $m/z$  calcd for  $\text{C}_{20}\text{H}_{25}\text{O}_3$  ( $\text{M}+\text{H}$ ) $^+$ : 313.1804, found 313.1813.

***rac*-(2*R*,3*S*)-2-Benzoyl-7,7-dimethyl-3-phenyl-2,3,4,6,7,8-hexahydro-5*H*-1-benzopyran-5-one (4k) (Table 3, entry 7).**

According to the typical procedure for the ring-opening cyclization of **1a** with **3a**, **4k** was prepared from **1f**<sup>2</sup> (73 mg, 0.30 mmol) with **3a** (81 mg, 0.45 mmol) for 9.5 h. The crude product was purified by column chromatography (silica gel, 30% EtOAc in hexane) to provide **4k** (98 mg, 91%) as a white solid: mp 124.5–125.5  $^{\circ}\text{C}$ ; IR (KBr,  $\text{cm}^{-1}$ )  $\nu$

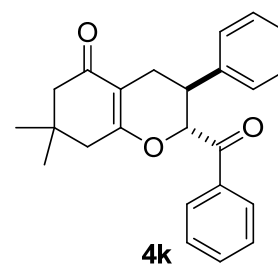

2952, 1698, 1646, 1597, 1448, 1384, 1205, 1163, 1111, 1040, 984, 765, 702;  $^1\text{H}$  NMR (400 MHz,  $\text{CDCl}_3$ )  $\delta$  7.85 (d,  $J = 7.2$  Hz, 2H), 7.57 (t,  $J = 7.2$  Hz, 1H), 7.44 (t,  $J = 7.2$  Hz, 2H), 7.27–7.17 (m, 5H), 5.60 (d,  $J = 5.6$  Hz, 1H), 3.55 (q,  $J = 5.6$  Hz, 1H), 2.55 (qd,  $J = 16.8, 6.4$  Hz, 2H), 2.46–2.24 (m, 4H), 1.10 (s, 3H), 1.07 (s, 3H);  $^{13}\text{C}$  NMR (100 MHz,  $\text{CDCl}_3$ )  $\delta$  197.5, 195.1, 168.6, 140.4, 134.7, 133.7, 128.8, 128.7, 128.6, 127.5, 127.2, 109.4, 80.5, 50.6, 42.0, 38.5, 32.2, 28.4, 22.1; HRMS (FAB)  $m/z$  calcd for  $\text{C}_{24}\text{H}_{25}\text{O}_3$  ( $\text{M}+\text{H}$ ) $^+$ : 361.1804, found 361.1804.

### III. Determination of the stereochemistry of **4a**

In order to assign the stereochemistry of **4a**, stereoisomer **4a'** was prepared under basic conditions and <sup>1</sup>H NOE experiments of these compounds **4a** and **4a'** were conducted.

**rac-(2R,3R)-2-Benzoyl-3-phenyl-2,3,4,6,7,8-hexahydro-5H-1-benzopyran-5-one (4a').**

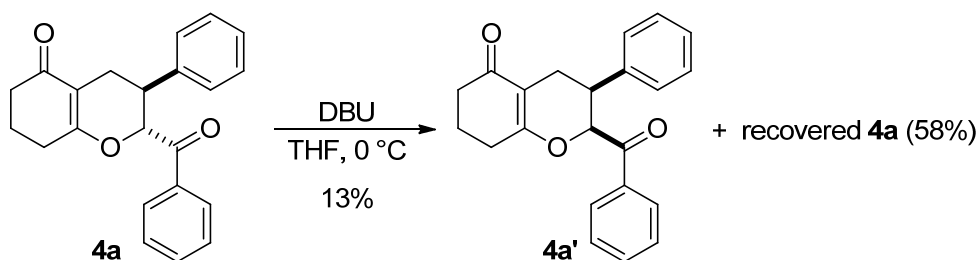

1,8-Diazabicyclo[5.4.0]undec-7-ene (DBU, 62 mg, 0.30 mmol) was added to a solution of **4a** (136 mg, 0.41 mmol) in THF (4.1 mL) at 0 °C. After stirring at this temperature for 3 h, the reaction was quenched by addition of saturated aqueous NH<sub>4</sub>Cl (3 mL), and the resulting mixture was extracted with EtOAc (3 x 10 mL). The combined organic layers were washed with water (10 mL) and brine (10 mL), and dried over anhydrous MgSO<sub>4</sub>. Filtration and evaporation in vacuo furnished the crude product, which was purified by column chromatography (silica gel, 40% EtOAc in hexane) to provide **4a'** (18 mg, 13%) as a colorless oil and starting material **4a** (79 mg, 58%) was recovered.

**4a'**: IR (film, cm<sup>-1</sup>)  $\nu$  2925, 1687, 1652, 1626, 1600, 1450, 1391, 1215, 1189, 1077, 755, 696, 593; <sup>1</sup>H NMR (400 MHz, CDCl<sub>3</sub>)  $\delta$  7.51 (d,  $J$  = 7.2 Hz, 2H), 7.44 (t,  $J$  = 7.2 Hz, 1H), 7.26 (t,  $J$  = 7.2 Hz, 2H), 7.14–7.08

(m, 3H), 7.04–7.02 (m, 2H), 5.71 (d,  $J$  = 4.0 Hz, 1H), 3.62 (m, 1H), 2.79 (dd,  $J$  = 16.4, 6.0 Hz, 1H), 2.66–2.52 (m, 3H), 2.47 (q,  $J$  = 6.0 Hz, 2H), 2.13–1.99 (m, 2H); <sup>13</sup>C NMR (100 MHz, CDCl<sub>3</sub>)  $\delta$  197.9, 195.6, 170.4, 138.1, 135.9, 133.2, 128.4, 128.3, 128.2, 128.0, 127.3, 111.8, 79.7, 40.3, 36.7, 28.3, 21.6, 20.9; HRMS (FAB)  $m/z$  calcd for C<sub>22</sub>H<sub>21</sub>O<sub>3</sub> (M+H)<sup>+</sup> 333.1491, found 333.1491.

**<sup>1</sup>H NOE experiments:**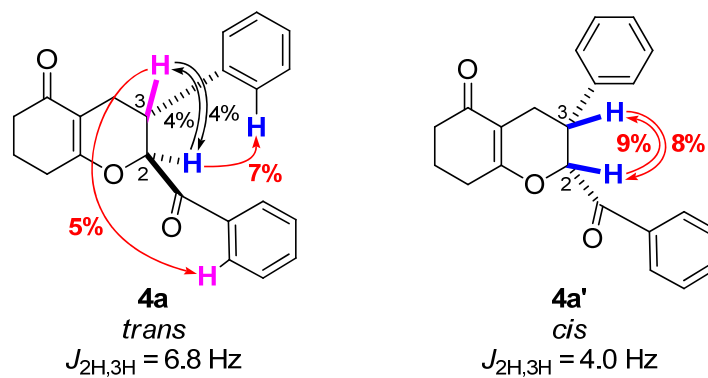<sup>1</sup>H NOE interaction

**4a:** C2-H → 3-phenyl-H (7%); C3-H → 2-benzoyl-H (5%)

[a less significant interaction: C2-H → C3-H (4%); C3-H → C2-H (4%)]

**4a':** C2-H → C3-H (9%); C3-H → C2-H (8%);

These data reveal that these stereochemistries of **4a** and **4a'** are 2,3-*trans* and 2,3-*cis*, respectively.

#### IV. Synthesis of 5-hydroxychromane 12

*rac*-(2*R*,3*S*)-2-Benzoyl-5-hydroxy-3-phenyl-3,4-dihydro-2*H*-1-benzopyran (**12**) (Scheme 5).

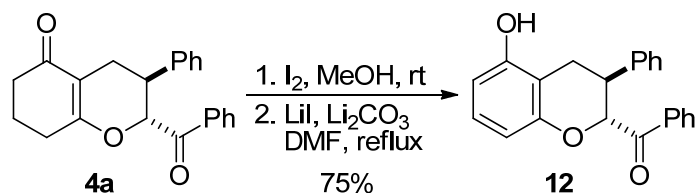

Iodine (137 mg, 0.54 mmol) was added to a solution of **4a** (60 mg, 0.18 mmol) in MeOH (0.90 mL) at room temperature. After stirring at this temperature for 24 h, the reaction mixture was quenched by addition of saturated aqueous  $\text{Na}_2\text{S}_2\text{O}_3$  (3 mL), and the resulting mixture was extracted with EtOAc (3 x 10 mL). The combined organic layers were washed with water (10 mL) and brine (10 mL), and dried over anhydrous  $\text{MgSO}_4$ . Filtration and evaporation in vacuo furnished the crude product (103 mg), which was used in the next step without further purification.

LiI (27 mg, 0.20 mmol) and  $\text{Li}_2\text{CO}_3$  (15 mg, 0.20 mmol) were added to a solution of crude product in DMF (1.8 mL). After stirring at reflux for 1.5 h, the reaction was cooled to room temperature and diluted with 20% EtOAc in hexane (3 mL). The reaction mixture was quenched by addition of saturated aqueous  $\text{NH}_4\text{Cl}$  (3 mL), and the resulting mixture was extracted with 20% EtOAc in hexane (3 x 10 mL). The combined organic layers were washed with water (10 mL) and brine (10 mL), and dried over anhydrous  $\text{MgSO}_4$ . Filtration was concentrated in vacuo, and the residue was purified by column chromatography (silica gel, 30% EtOAc in hexane) to provide **12** (44 mg, 75%) as a colorless oil: IR (film,  $\text{cm}^{-1}$ )  $\nu$  2925, 1684, 1617, 1597, 1497, 1466, 1448, 1283, 1225, 1069, 1002, 757, 695;  $^1\text{H}$  NMR (400 MHz,  $\text{CDCl}_3$ )  $\delta$  7.92 (d,  $J = 7.2$  Hz, 1H), 7.54 (t,  $J = 7.2$  Hz, 1H), 7.40 (t,  $J = 7.2$  Hz, 1H), 7.26–7.15 (m, 5H), 7.00 (t,  $J = 8.0$  Hz, 1H), 6.56 (d,  $J = 8.0$  Hz, 1H), 6.41 (d,  $J = 8.0$  Hz, 1H), 5.46 (d,  $J = 7.2$  Hz, 1H), 5.05 (s, 1H), 3.66 (q,  $J = 7.2$  Hz, 1H), 3.11 (dd,  $J = 16.8, 7.2$  Hz, 1H), 2.95 (dd,  $J = 16.8$  Hz, 7.2 Hz, 1H);  $^{13}\text{C}$  NMR (100 MHz,  $\text{CDCl}_3$ )  $\delta$  196.5, 154.5, 153.8, 140.7, 135.4, 133.4, 129.0, 128.7, 128.5, 127.9, 127.3, 127.1, 109.2, 109.1, 107.4, 80.0, 39.6, 25.4; HRMS (FAB)  $m/z$  calcd for  $\text{C}_{22}\text{H}_{19}\text{O}_3$  ( $\text{M}+\text{H}$ ) $^+$  331.1334, found 331.1333.

## V. X-ray crystallographic data of **6**

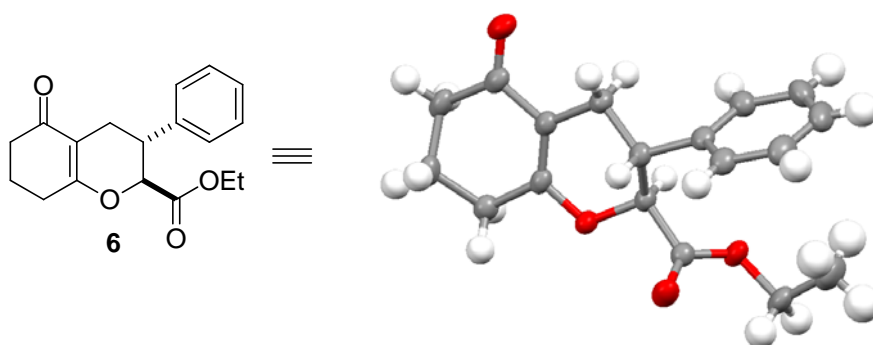

X-ray of **6** (CCDC 1915566)

### A. Crystal Data

|                         |                                                                                                                                  |
|-------------------------|----------------------------------------------------------------------------------------------------------------------------------|
| Empirical Formula       | C <sub>18</sub> H <sub>20</sub> O <sub>4</sub>                                                                                   |
| Formula Weight          | 300.35                                                                                                                           |
| Crystal Color, Habit    | colorless, block                                                                                                                 |
| Crystal Dimensions      | 0.250 X 0.250 X 0.150 mm                                                                                                         |
| Crystal System          | orthorhombic                                                                                                                     |
| Lattice Type            | A-centered                                                                                                                       |
| Lattice Parameters      | $a = 8.05576(16) \text{ \AA}$<br>$b = 24.7866(5) \text{ \AA}$<br>$c = 15.4543(3) \text{ \AA}$<br>$V = 3085.84(11) \text{ \AA}^3$ |
| Space Group             | Aea2 (#41)                                                                                                                       |
| Z value                 | 8                                                                                                                                |
| D <sub>calc</sub>       | 1.293 g/cm <sup>3</sup>                                                                                                          |
| F <sub>000</sub>        | 1280.00                                                                                                                          |
| $\mu(\text{CuK}\alpha)$ | 7.399 cm <sup>-1</sup>                                                                                                           |



## B. Intensity Measurements

|                                                        |                                                                                                              |
|--------------------------------------------------------|--------------------------------------------------------------------------------------------------------------|
| Diffractometer                                         | R-AXIS RAPID                                                                                                 |
| Radiation                                              | CuK $\alpha$ ( $\lambda = 1.54187 \text{ \AA}$ )<br>multi-layer mirror monochromated                         |
| Voltage, Current                                       | 40kV, 30mA                                                                                                   |
| Temperature                                            | -100.0°C                                                                                                     |
| Detector Aperture                                      | 460.0 x 256.0 mm                                                                                             |
| Data Images                                            | 180 exposures                                                                                                |
| $\omega$ oscillation Range ( $\chi=54.0, \phi=0.0$ )   | 80.0 - 260.0°                                                                                                |
| Exposure Rate                                          | 5.0 sec./°                                                                                                   |
| $\omega$ oscillation Range ( $\chi=54.0, \phi=90.0$ )  | 80.0 - 260.0°                                                                                                |
| Exposure Rate                                          | 5.0 sec./°                                                                                                   |
| $\omega$ oscillation Range ( $\chi=54.0, \phi=180.0$ ) | 80.0 - 260.0°                                                                                                |
| Exposure Rate                                          | 5.0 sec./°                                                                                                   |
| $\omega$ oscillation Range ( $\chi=54.0, \phi=270.0$ ) | 80.0 - 260.0°                                                                                                |
| Exposure Rate                                          | 5.0 sec./°                                                                                                   |
| $\omega$ oscillation Range ( $\chi=0.0, \phi=0.0$ )    | 80.0 - 260.0°                                                                                                |
| Exposure Rate                                          | 5.0 sec./°                                                                                                   |
| Detector Position                                      | 127.00 mm                                                                                                    |
| Pixel Size                                             | 0.100 mm                                                                                                     |
| $2\theta_{\text{max}}$                                 | 136.3°                                                                                                       |
| No. of Reflections Measured                            | Total: 16768<br>Unique: 2780 ( $R_{\text{int}} = 0.0329$ )<br>Parsons quotients (Flack x<br>parameter): 1197 |
| Corrections                                            | Lorentz-polarization<br>Absorption<br>(trans. factors: 0.728 - 0.895)                                        |

## C. Structure Solution and Refinement

|                                             |                                                                                                                      |
|---------------------------------------------|----------------------------------------------------------------------------------------------------------------------|
| Structure Solution                          | Direct Methods (SHELXT Version 2018/2)                                                                               |
| Refinement                                  | Full-matrix least-squares on $F^2$                                                                                   |
| Function Minimized                          | $\sum w (F_o^2 - F_c^2)^2$                                                                                           |
| Least Squares Weights                       | $w = 1 / [ \sigma^2(F_o^2) + (0.0339 \cdot P)^2 + 0.6254 \cdot P ]$<br>where $P = (\text{Max}(F_o^2, 0) + 2F_c^2)/3$ |
| $2\theta_{\text{max}}$ cutoff               | 136.3°                                                                                                               |
| Anomalous Dispersion                        | All non-hydrogen atoms                                                                                               |
| No. Observations (All reflections)          | 2780                                                                                                                 |
| No. Variables                               | 200                                                                                                                  |
| Reflection/Parameter Ratio                  | 13.90                                                                                                                |
| Residuals: $R_1$ ( $I > 2.00\sigma(I)$ )    | 0.0248                                                                                                               |
| Residuals: $R$ (All reflections)            | 0.0259                                                                                                               |
| Residuals: $wR_2$ (All reflections)         | 0.0636                                                                                                               |
| Goodness of Fit Indicator                   | 1.033                                                                                                                |
| Flack parameter (Parsons' quotients = 1197) | 0.03(4)                                                                                                              |
| Max Shift/Error in Final Cycle              | 0.000                                                                                                                |
| Maximum peak in Final Diff. Map             | 0.14 e <sup>-</sup> /Å <sup>3</sup>                                                                                  |
| Minimum peak in Final Diff. Map             | -0.13 e <sup>-</sup> /Å <sup>3</sup>                                                                                 |

## References

1. K. W. Ratts and A. N. Yao, *J. Org. Chem.*, 1966, **31**, 1185–1188.
2. H. Nambu, M. Fukumoto, W. Hirota, N. Ono and T. Yakura, *Tetrahedron Lett.*, 2015, **56**, 4312–4315.
3. H. Nambu, N. Ono, W. Hirota, M. Fukumoto and T. Yakura, *Chem. Pharm. Bull.*, 2016, **64**, 1763–1768.
4. H. Nambu, N. Ono and T. Yakura, *Synthesis*, 2016, **48**, 1892–1901.
5. E. Richmond, V. D. Vuković and J. Moran, *Org. Lett.*, 2018, **16**, 1626–1629.
6. G. B. Payne, *J. Org. Chem.*, 1967, **32**, 3351–3355.
7. J. Quintana, M. Torres and F. Serratosa, *Tetrahedron*, 1973, **29**, 2065–2076.
8. E. T. Ledingham, C. J. Merritt, C. J. Sumby, M. K. Taylor and B. W. Greatrex, *Synthesis*, 2017, **49**, 2652–2662.
9. K. J. Bruemmer, S. Merrikhihaghi, C. T. Lollar, S. N. S. Morris, J. H. Bauer and A. R. Lippert, *Chem. Commun.*, 2014, **50**, 12311–12314.

E:\oonuki\S-ylide "\_\*%--ppdf\j\^COPh-S-ylide-1H.als

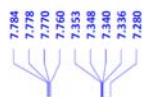

4.340

2.963

0.000

DFILE COPh-S-ylide-1H.als  
 COMNT single\_pulse  
 DATIM 2018-09-03 12:51:38  
 OBNUC 1H  
 EXMOD proton.jpg  
 OBFRQ 399.78 MHz  
 OBSET 4.19 KHz  
 OBFIN 7.29 KHz  
 POINT 13107  
 FREQU 6002.40 Hz  
 SCANS 16  
 ACQTM 2.1837 sec  
 PD 5.0000 sec  
 PW1 5.55 usec  
 IRNUC 1H  
 CTEMP 23.3 c  
 SLVNT CDCL3  
 EXREF 0.00 ppm  
 BF 0.12 Hz  
 RGAIN 32

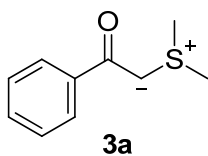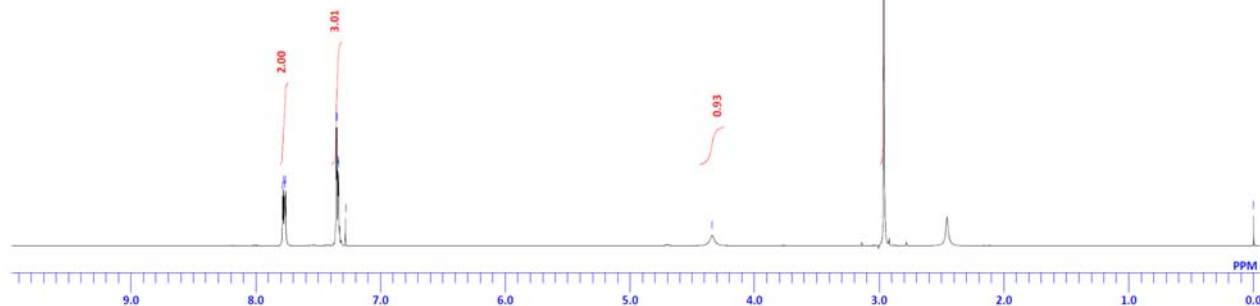

E:\oonuki\S-ylide "\_\*%--ppdf\j\^COPh-S-ylide-13C.als

183.045

140.759

129.498

127.849

126.285

77.324

77.000

76.685

51.990

28.535

DFILE COPh-S-ylide-13C.als  
 COMNT single pulse decoupled gated NOE  
 DATIM 2018-09-03 12:55:28  
 OBNUC 13C  
 EXMOD carbon.jpg  
 OBFRQ 100.53 MHz  
 OBSET 5.35 KHz  
 OBFIN 5.86 Hz  
 POINT 26214  
 FREQU 25125.63 Hz  
 SCANS 266  
 ACQTM 1.0433 sec  
 PD 2.0000 sec  
 PW1 3.33 usec  
 IRNUC 1H  
 CTEMP 23.2 c  
 SLVNT CDCL3  
 EXREF 77.00 ppm  
 BF 0.12 Hz  
 RGAIN 56

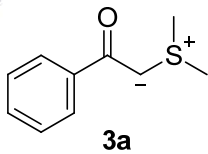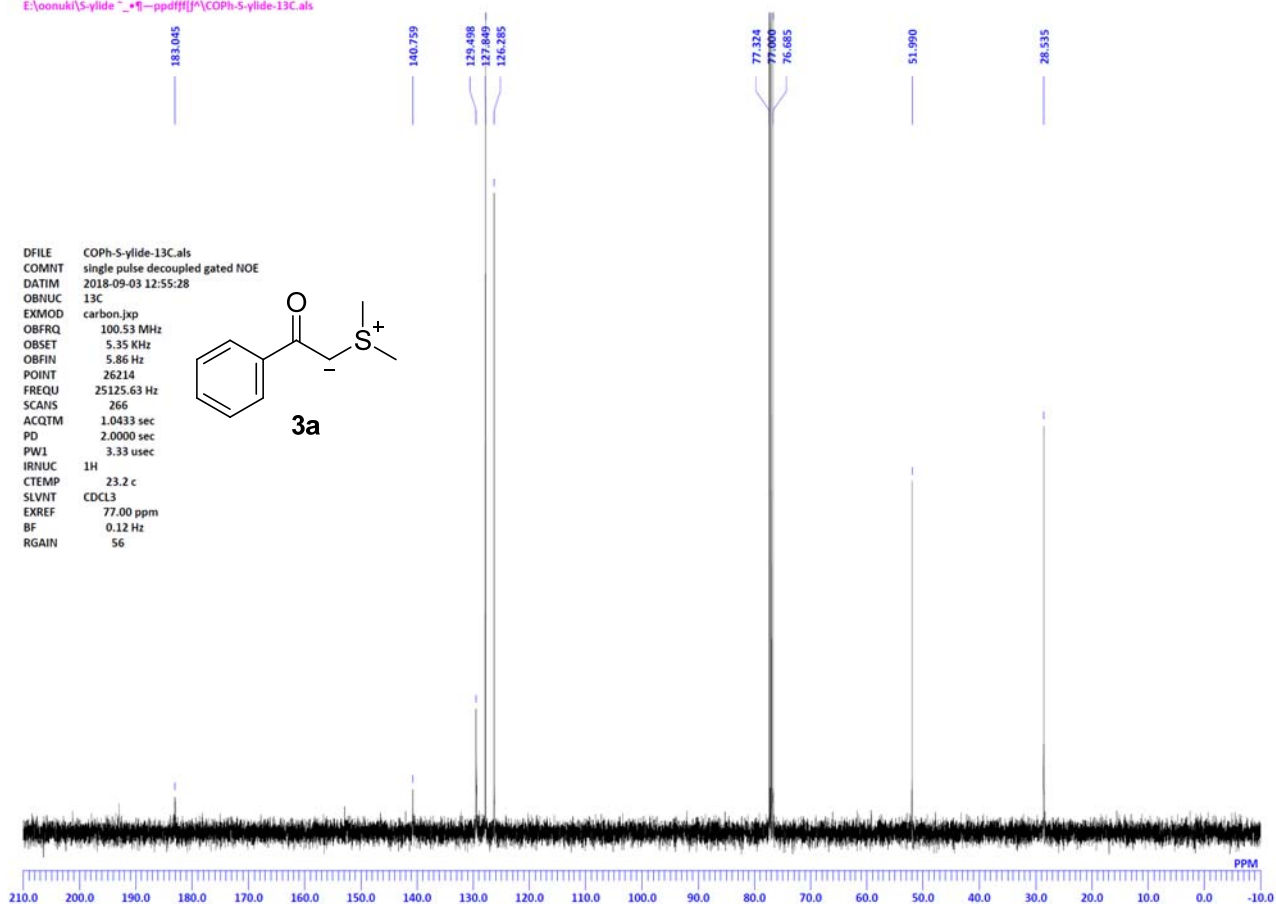

E:\oonuk\5-ylide "\_\*%--ppdf\p-MeOC6H4-S-ylide-1H.als

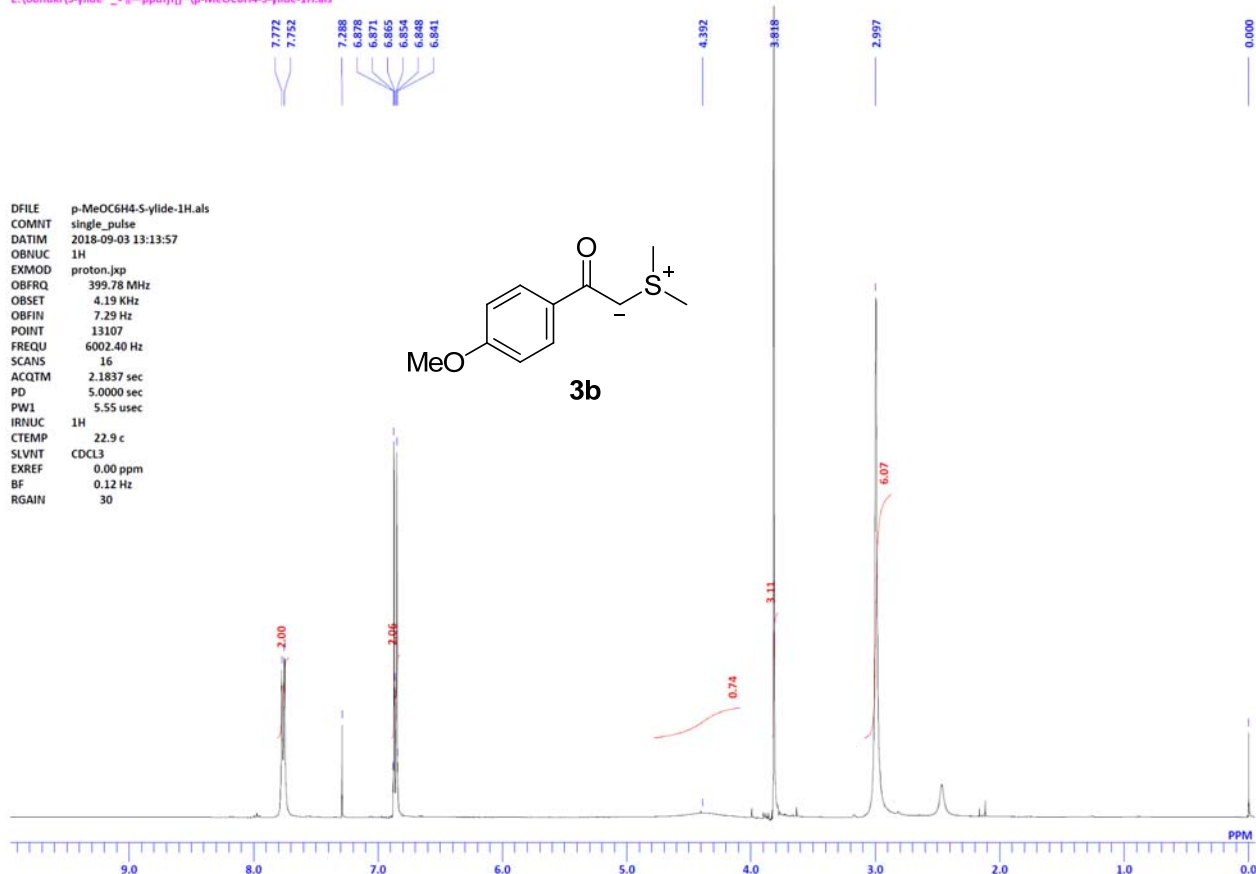

E:\oonuk\5-ylide "\_\*%--ppdf\p-MeO-C6H4-S-ylide-13C.als

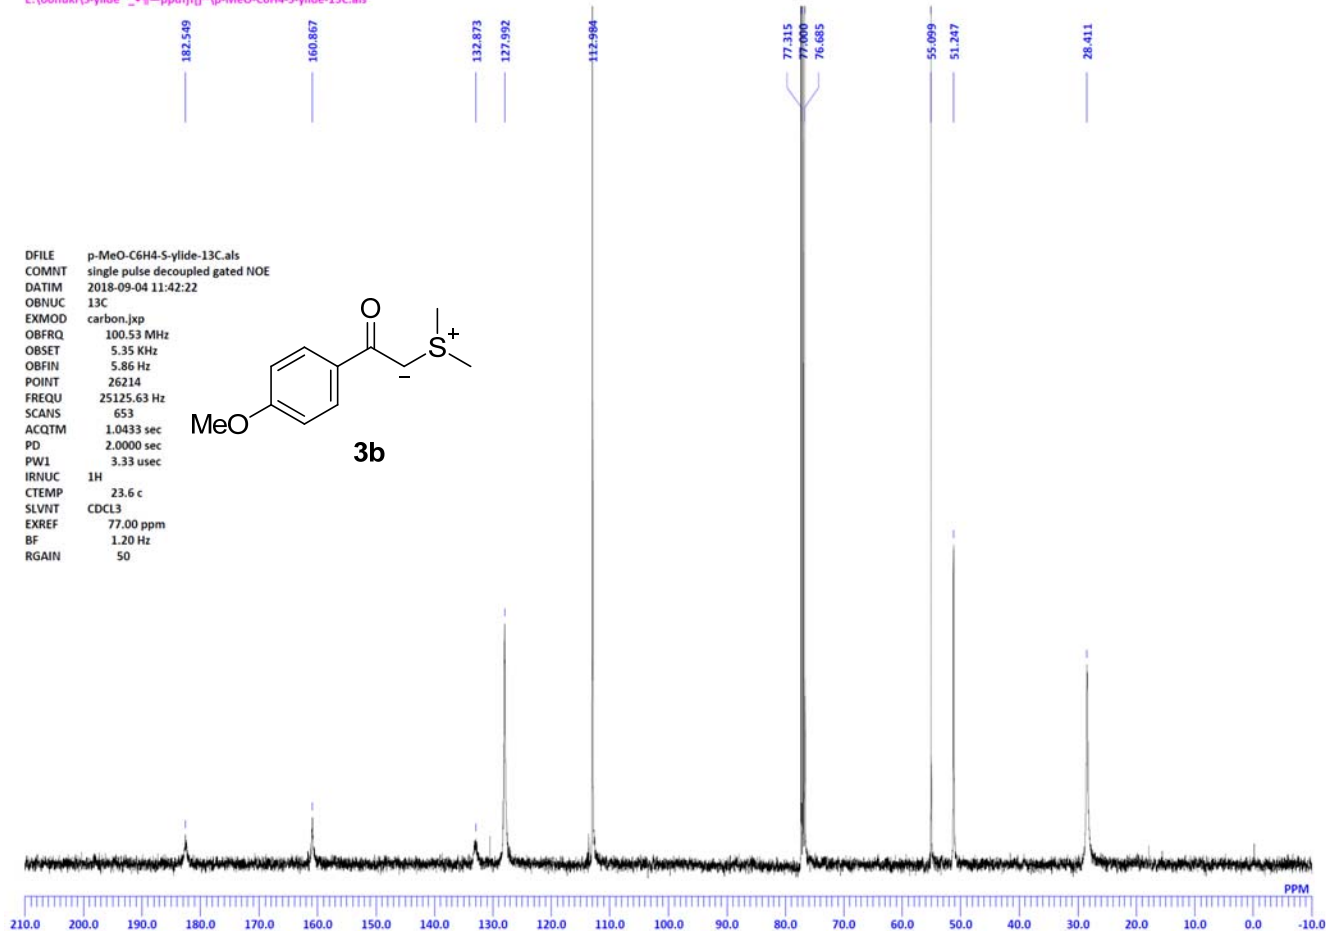

E:\oonuk\5-ylide "\_\*"-ppdf\p\p-CIC6H4-S-ylide-1H.als

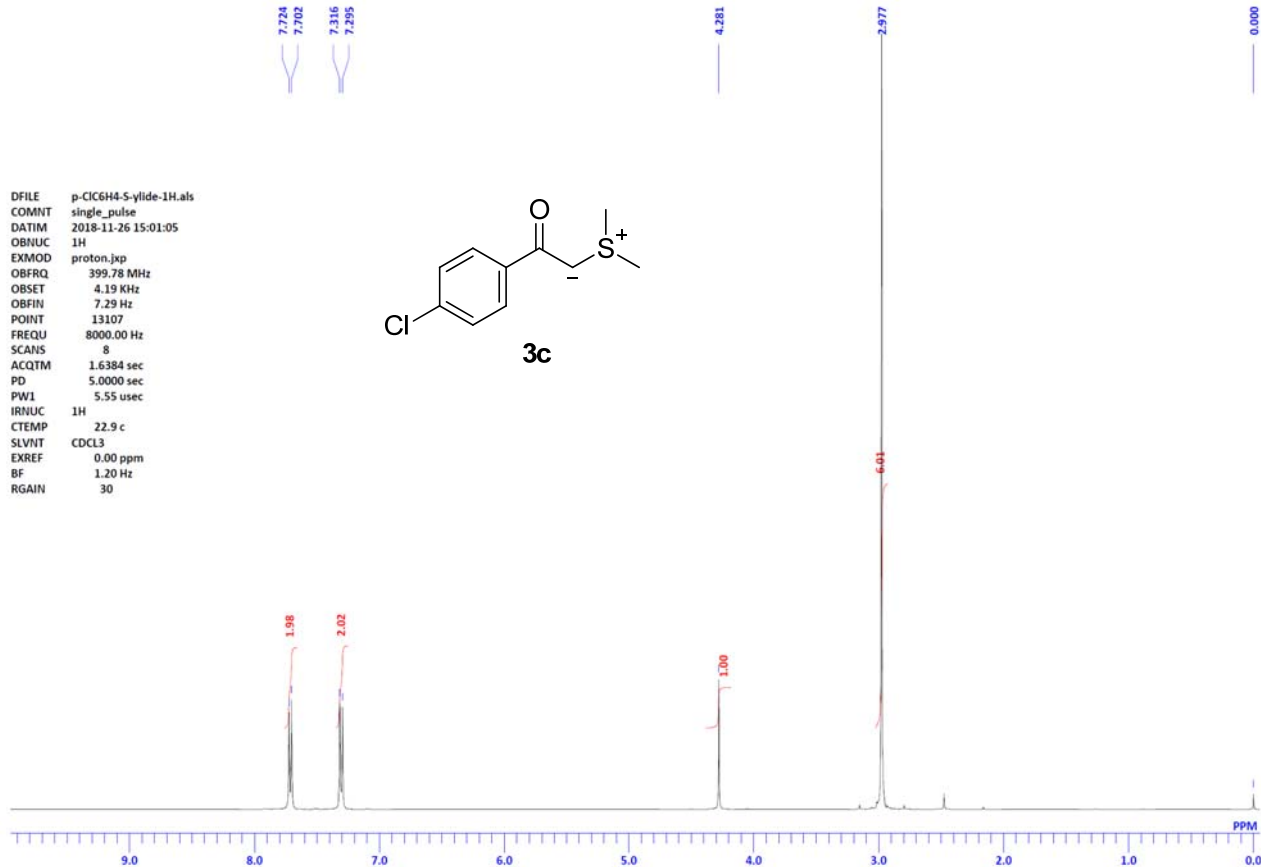

E:\oonuk\5-ylide "\_\*"-ppdf\p\p-CIC6H4-S-ylide-13C.als

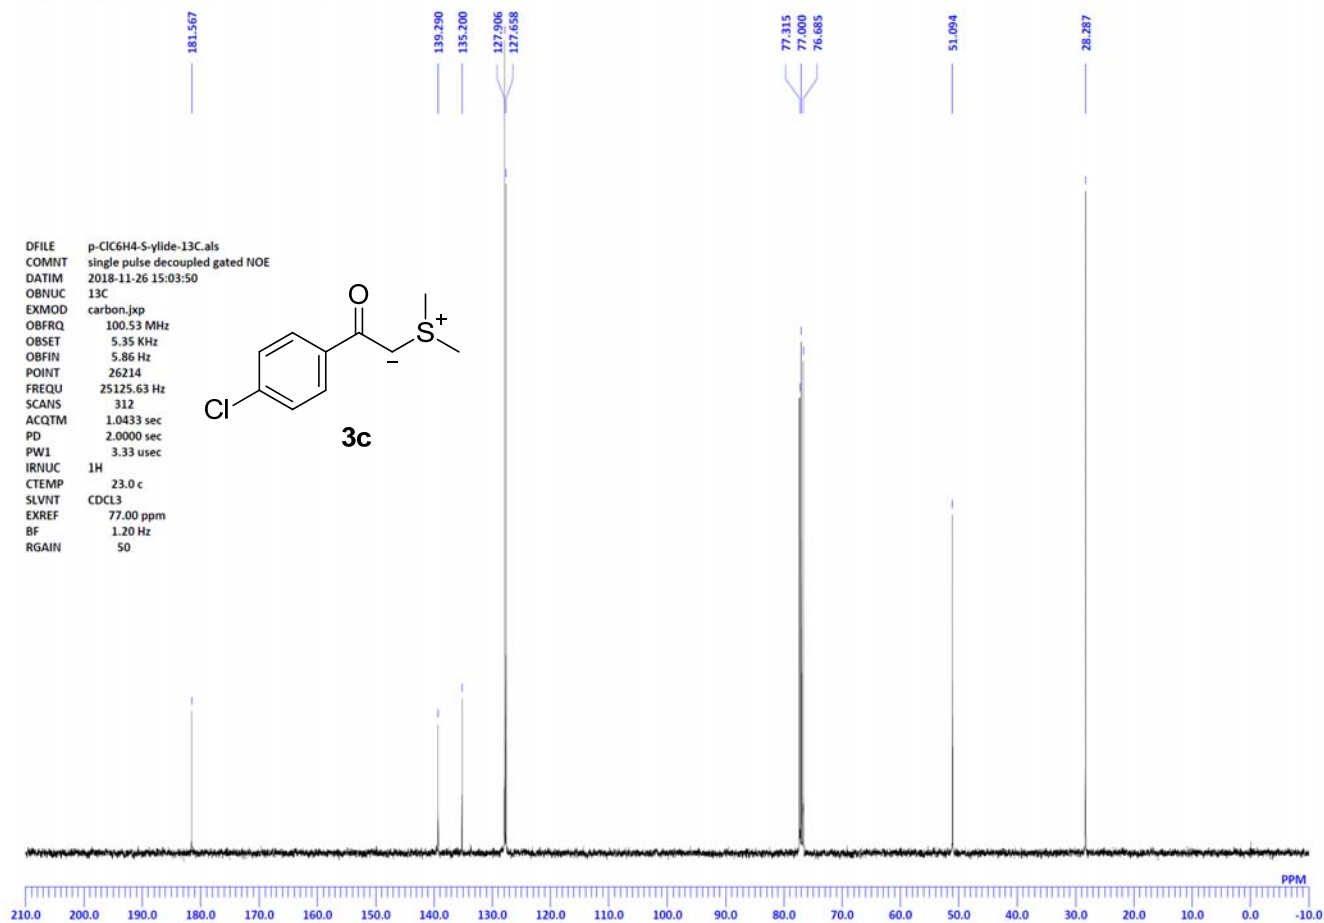

E:\oonuki\S-ylide "-\*¶—ppdf[f^p-NO2C6H4-S-ylide-1H.als

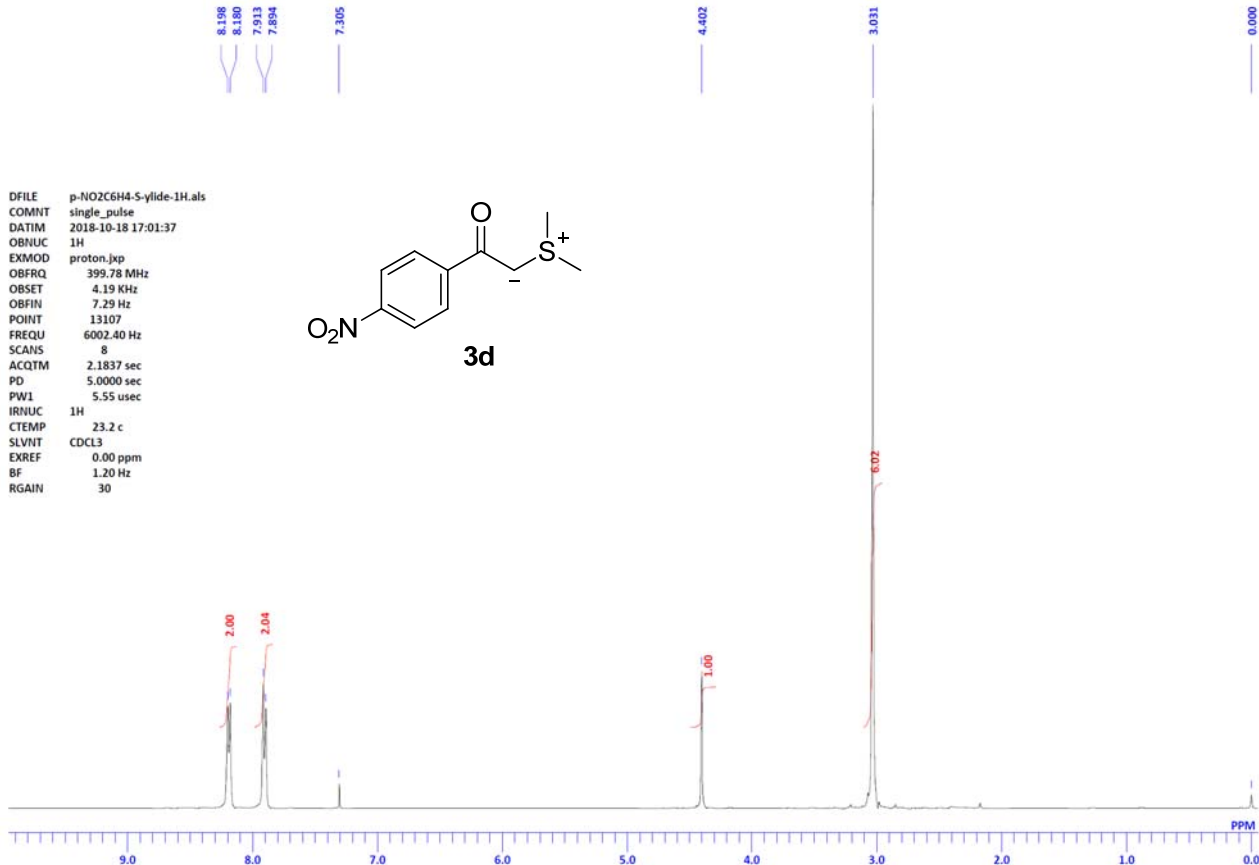

E:\oonuki\S-ylide "-\*¶—ppdf[f^p-NO2C6H4-S-ylide-13C.als

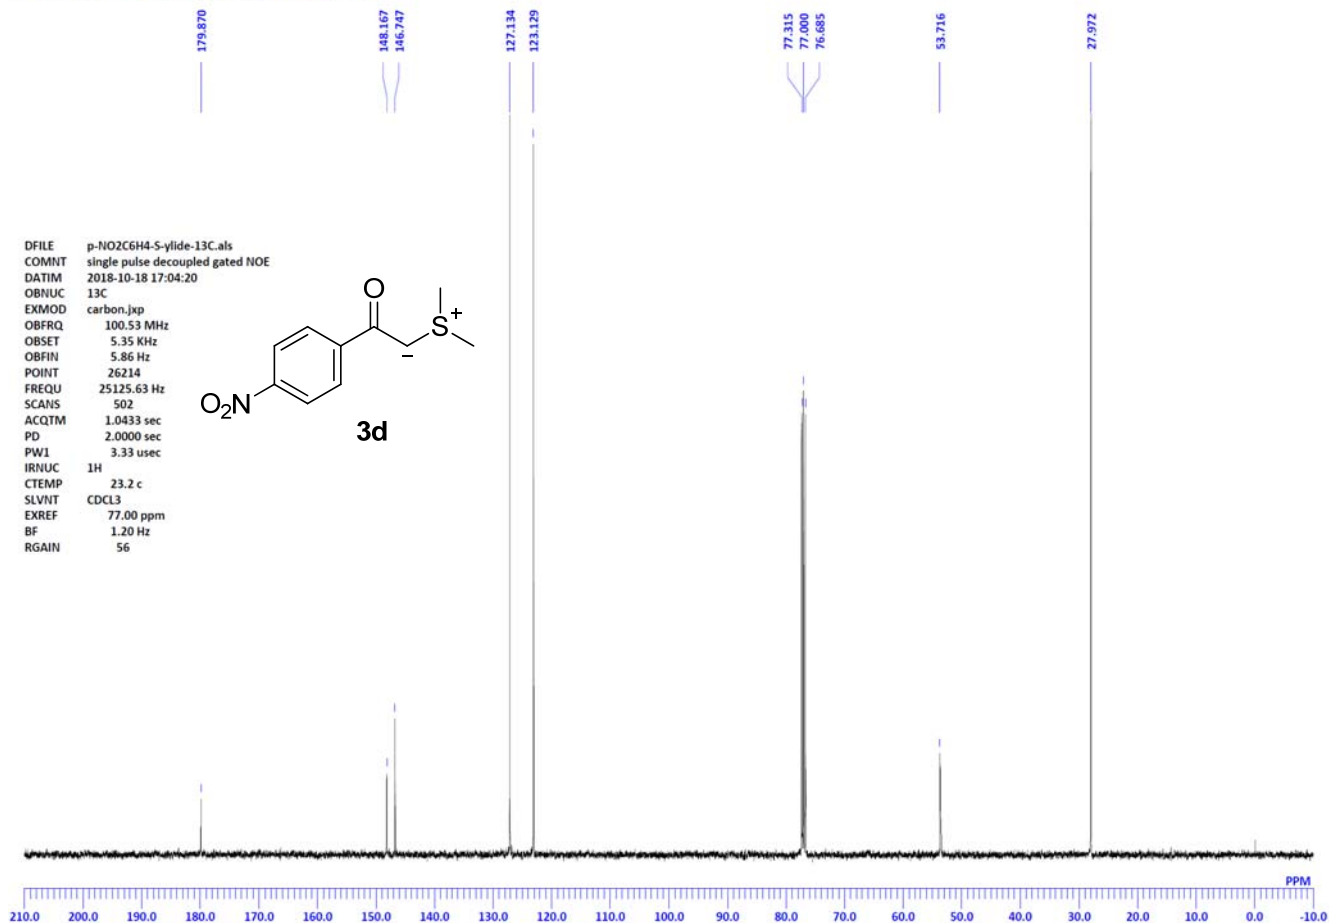

E:\oonuki\5-ylide "\_\*"-ppdf\COMe-S-ylide-1H.als

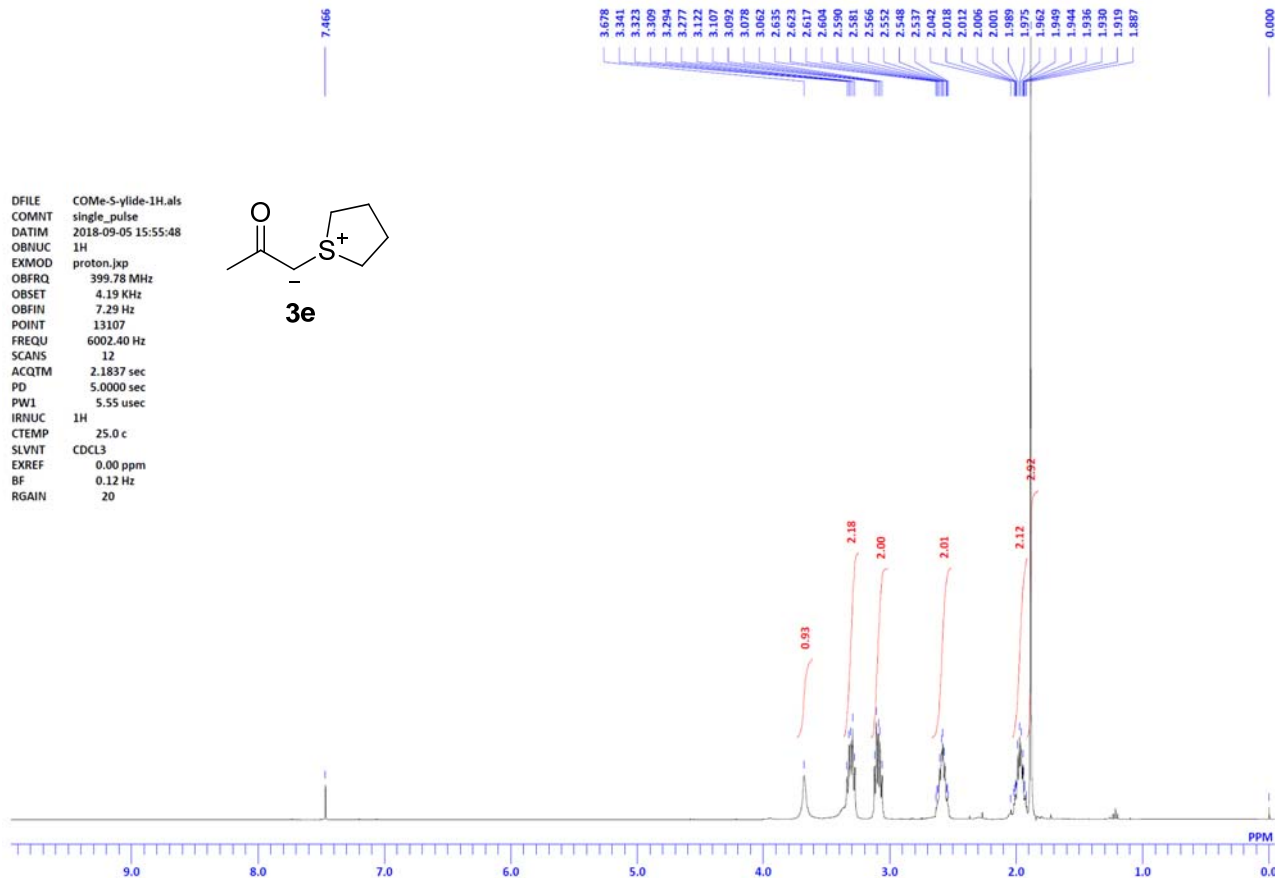

E:\oonuki\5-ylide "\_\*"-ppdf\COMe-S-ylide-13C.als

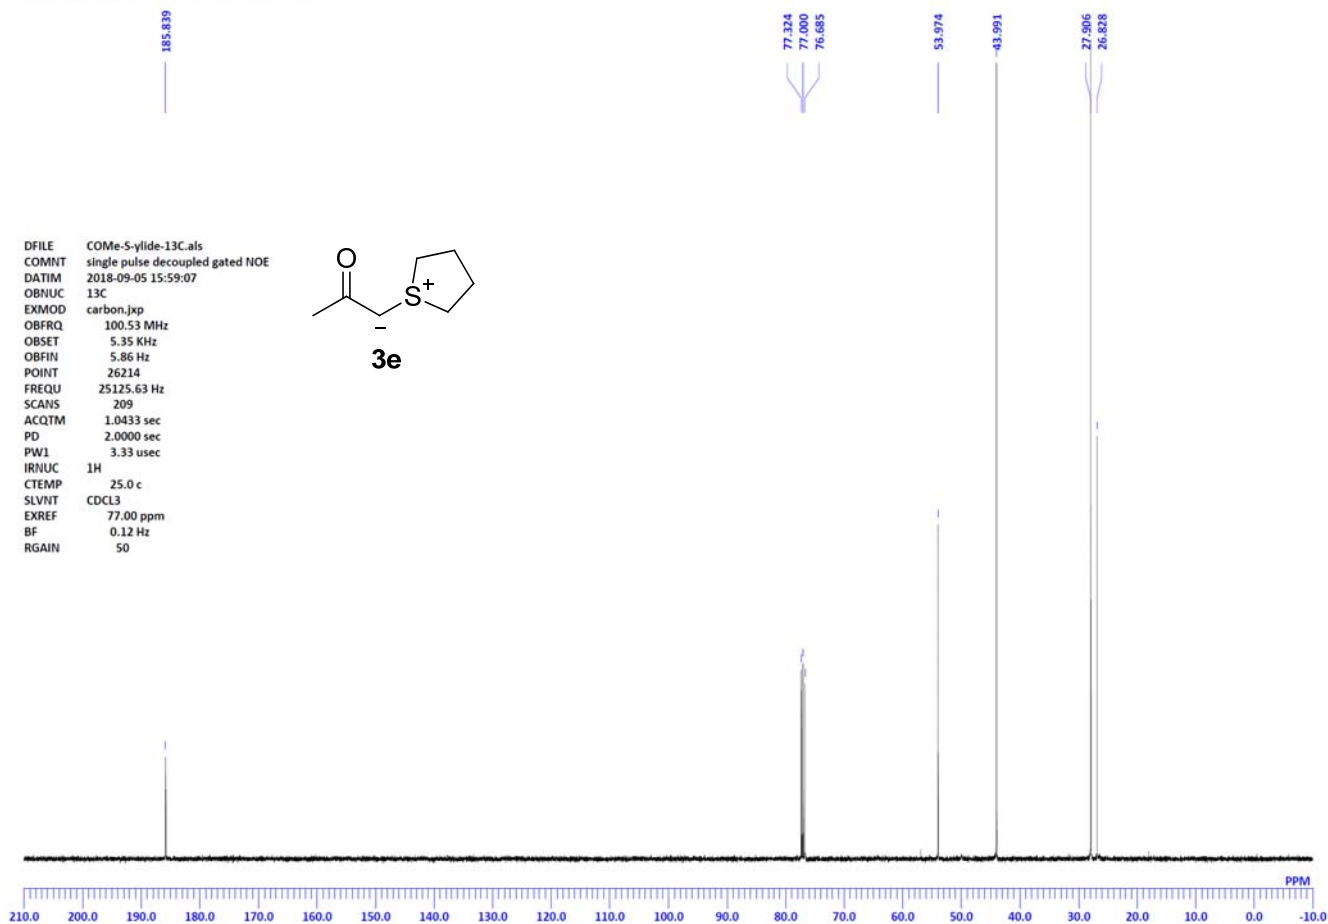



E:\oonuki\S-ylide "\_\*¶--ppdfff\3\COTBu-S-ylide-1H.als

DFILE COTBu-S-ylide-1H.als  
 COMNT single\_pulse  
 DATIM 2018-09-03 13:41:17  
 OBNUC 1H  
 EXMOD proton.jxp  
 OBFRQ 399.78 MHz  
 OBSET 4.19 KHz  
 OBFIN 7.29 Hz  
 POINT 13107  
 FREQU 6002.40 Hz  
 SCANS 16  
 ACQTM 2.1837 sec  
 PD 5.0000 sec  
 PW1 5.55 usec  
 IRNUC 1H  
 CTEMP 22.9 c  
 SLVNT CDCL3  
 EXREF 0.00 ppm  
 BF 0.12 Hz  
 RGAIN 30

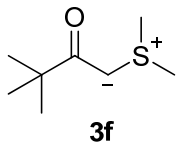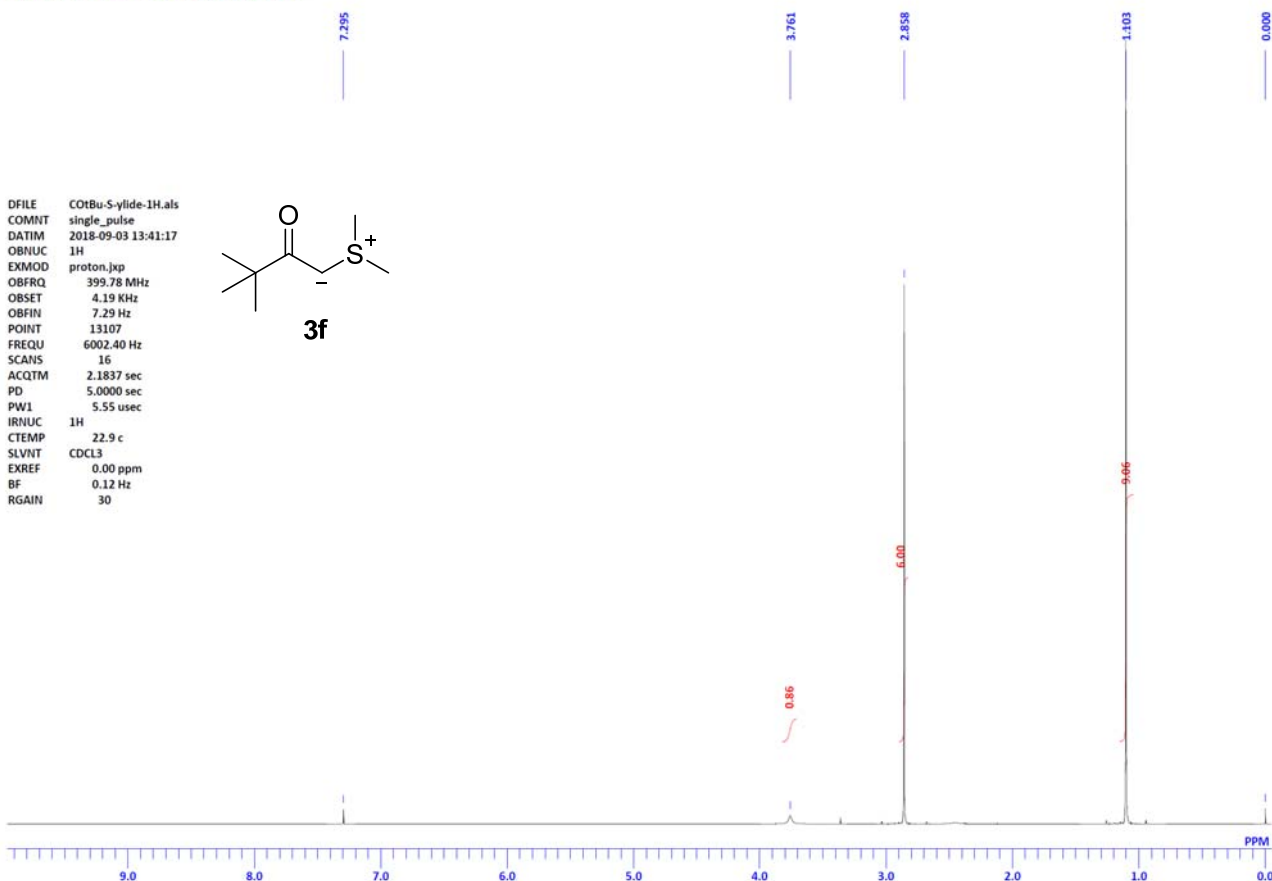

E:\oonuki\S-ylide "\_\*¶--ppdfff\3\COTBu-S-ylide-13C.als

DFILE COTBu-S-ylide-13C.als  
 COMNT single pulse decoupled gated NOE  
 DATIM 2018-09-03 13:45:05  
 OBNUC 13C  
 EXMOD carbon.jxp  
 OBFRQ 100.53 MHz  
 OBSET 5.35 KHz  
 OBFIN 5.86 Hz  
 POINT 26214  
 FREQU 25125.63 Hz  
 SCANS 174  
 ACQTM 1.0433 sec  
 PD 2.0000 sec  
 PW1 3.33 usec  
 IRNUC 1H  
 CTEMP 23.1 c  
 SLVNT CDCL3  
 EXREF 77.00 ppm  
 BF 0.12 Hz  
 RGAIN 50

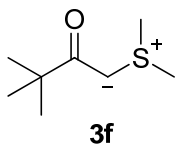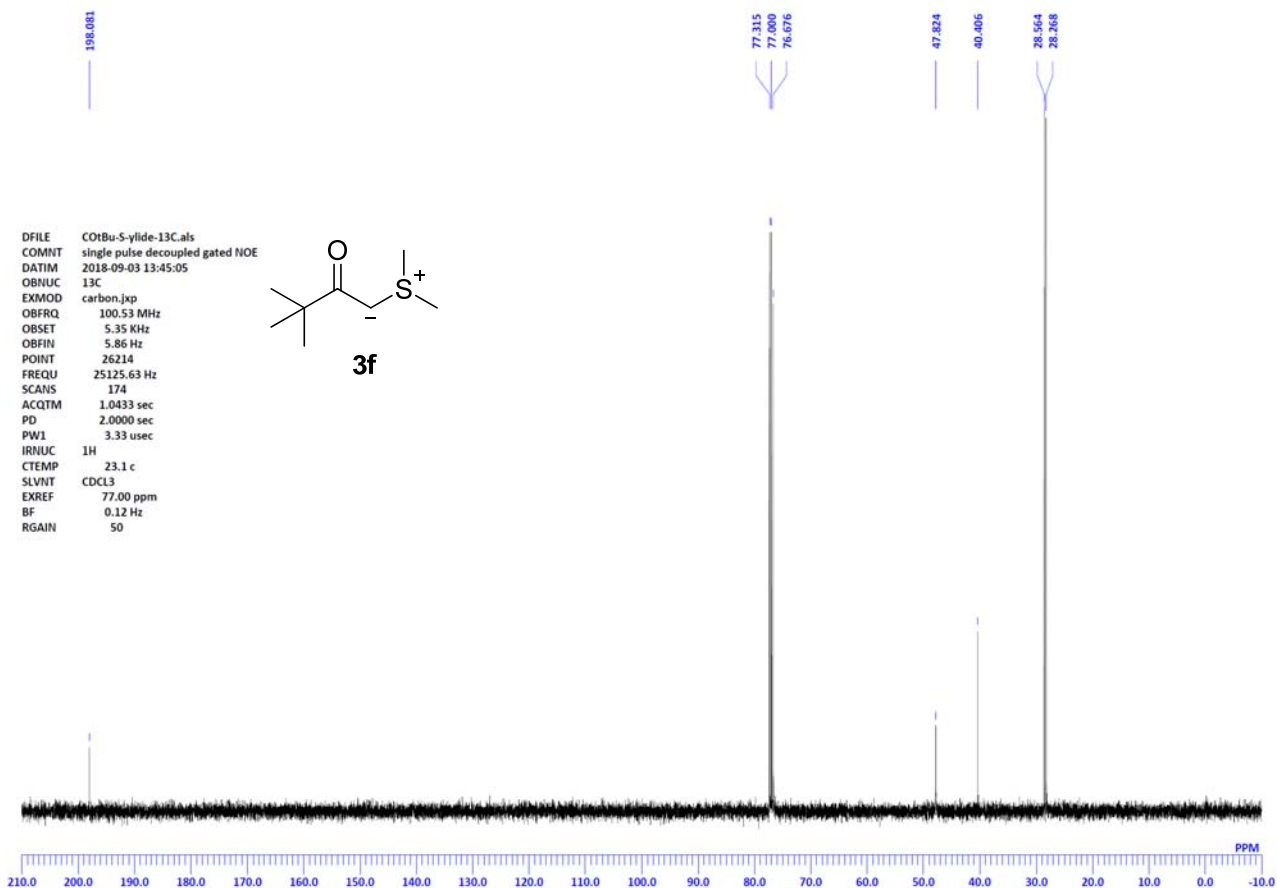

E:\oonuk\5-ylide "\_\*"--ppdfff\CO2Et-S-ylide-1H.als

DFILE CO2Et-S-ylide-1H.als  
 COMNT single\_pulse  
 DATIM 2018-10-05 18:52:23  
 OBNUC 1H  
 EXMOD proton.jxp  
 OBFRQ 399.78 MHz  
 OBSET 4.19 KHz  
 OBFIN 7.29 Hz  
 POINT 13107  
 FREQU 6002.40 Hz  
 SCANS 8  
 ACQTM 2.1837 sec  
 PD 5.0000 sec  
 PW1 5.55 usec  
 IRNUC 1H  
 CTEMP 23.4 c  
 SLVNT CDCL3  
 EXREF 0.00 ppm  
 BF 1.20 Hz  
 RGAIN 26

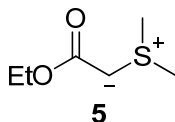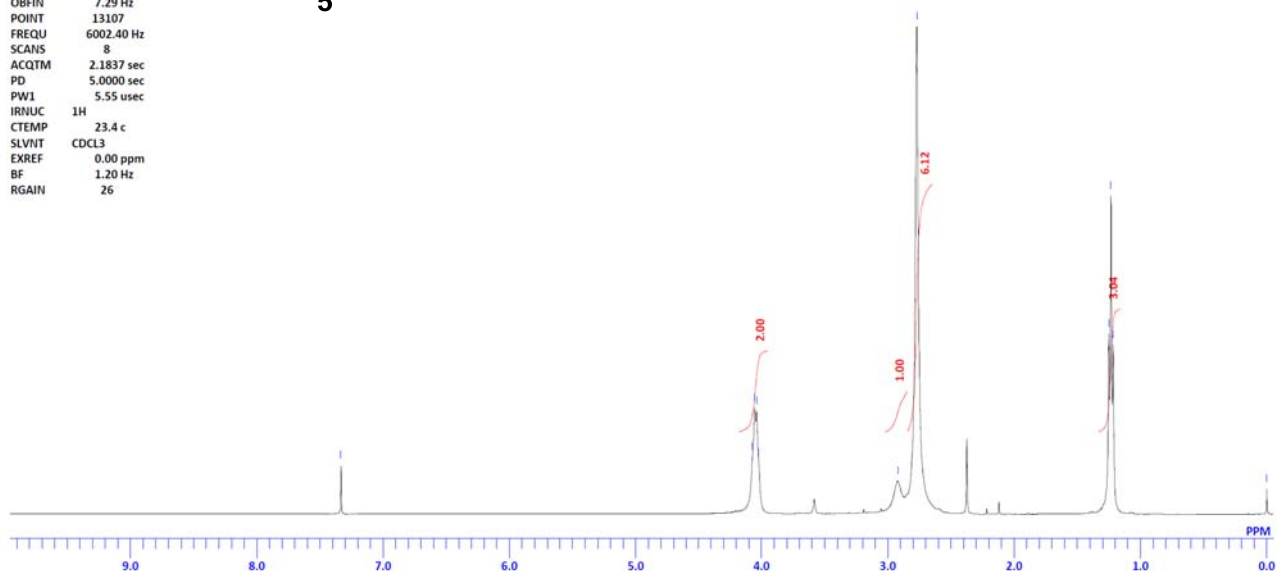

E:\oonuk\5-ylide "\_\*"--ppdfff\CO2Et-S-ylide-13C.als

DFILE CO2Et-S-ylide-13C.als  
 COMNT single pulse decoupled gated NOE  
 DATIM 2018-10-05 18:56:11  
 OBNUC 13C  
 EXMOD carbon.jxp  
 OBFRQ 100.53 MHz  
 OBSET 5.35 KHz  
 OBFIN 5.86 Hz  
 POINT 26214  
 FREQU 25125.63 Hz  
 SCANS 401  
 ACQTM 1.0433 sec  
 PD 2.0000 sec  
 PW1 3.33 usec  
 IRNUC 1H  
 CTEMP 23.6 c  
 SLVNT CDCL3  
 EXREF 77.00 ppm  
 BF 1.20 Hz  
 RGAIN 58

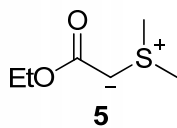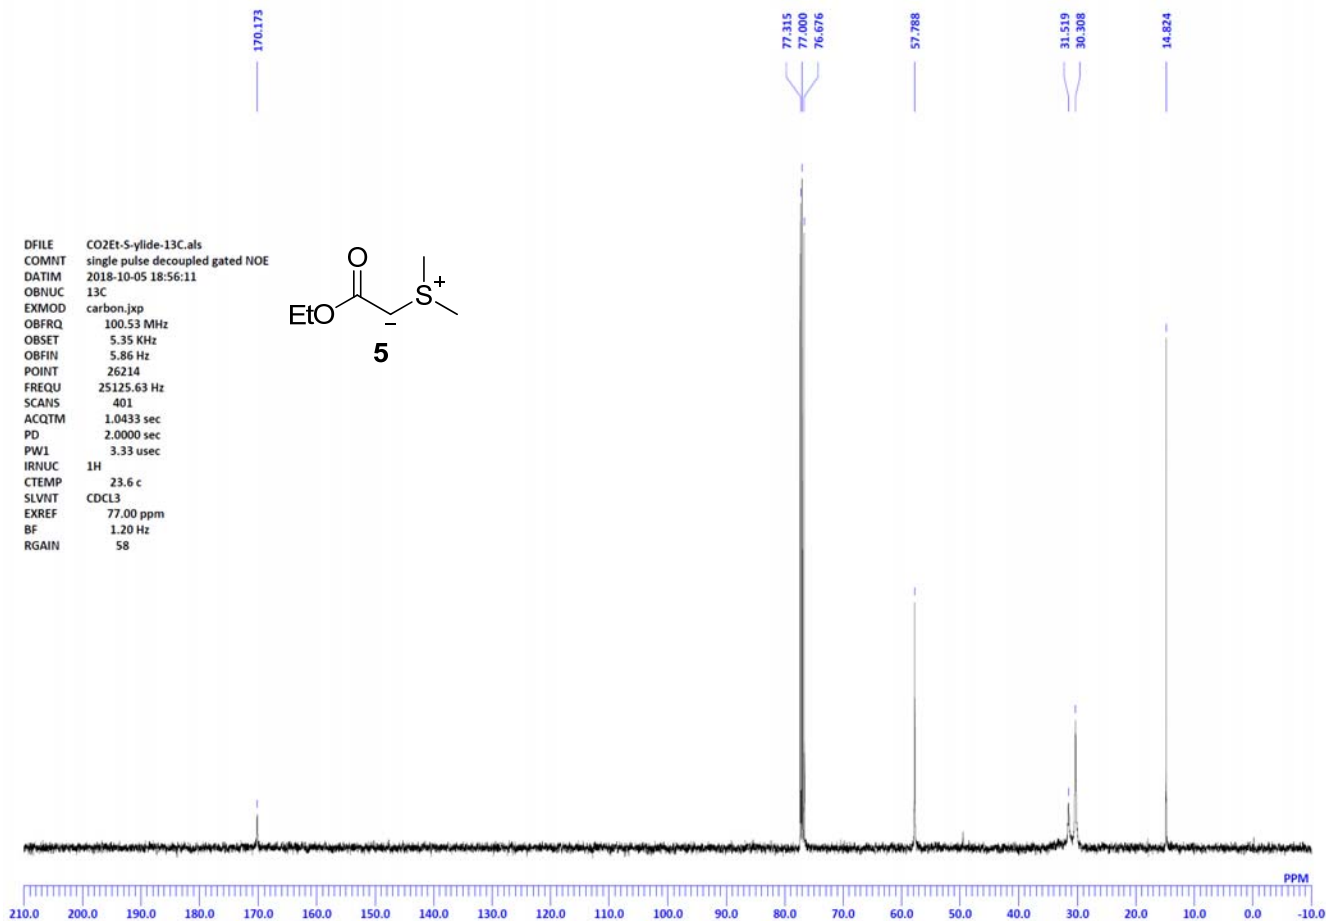

E:\NMRdata chroman\trans-2-COPh-3-Ph-chromanone-1H.als

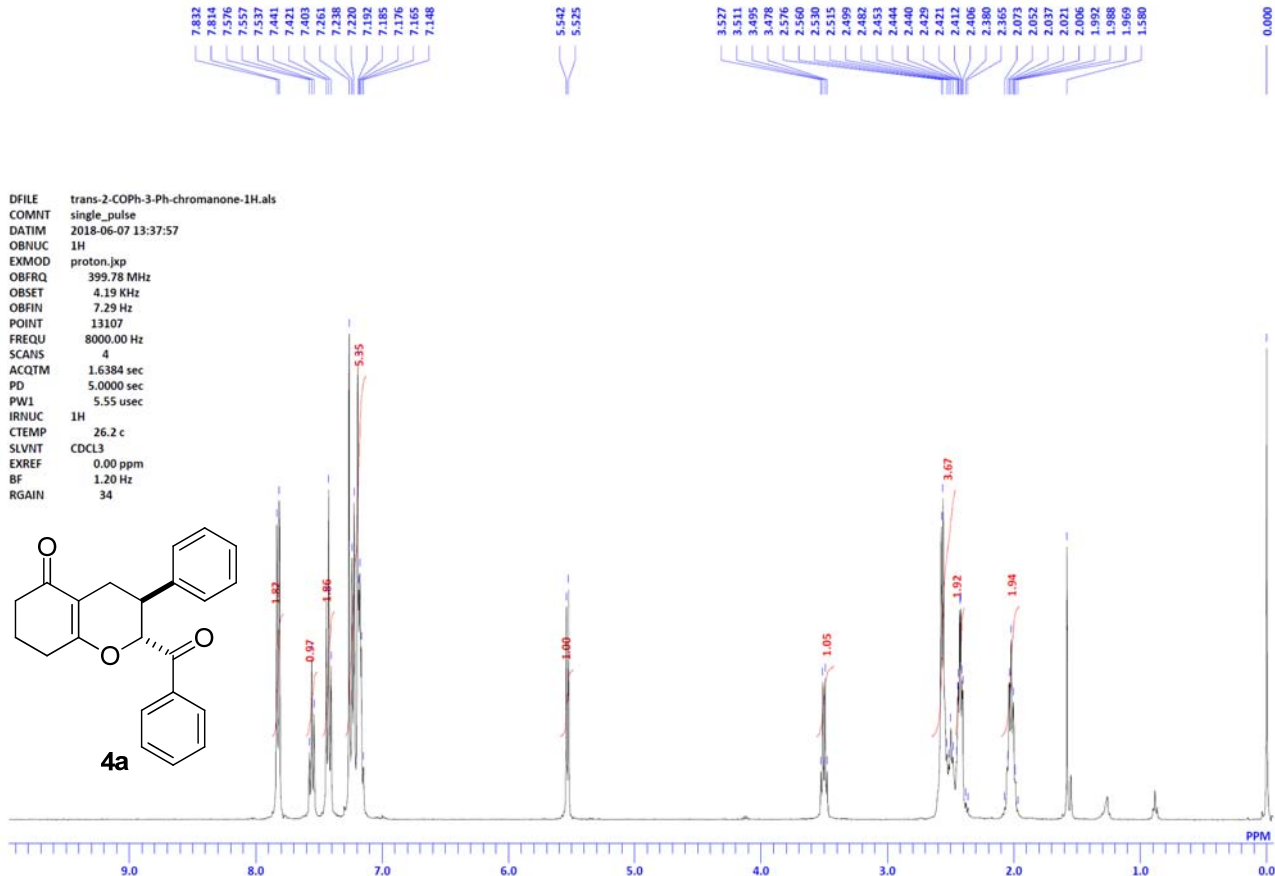

E:\NMRdata chroman\trans-2-COPh-3-Ph-chromanone-13C.als

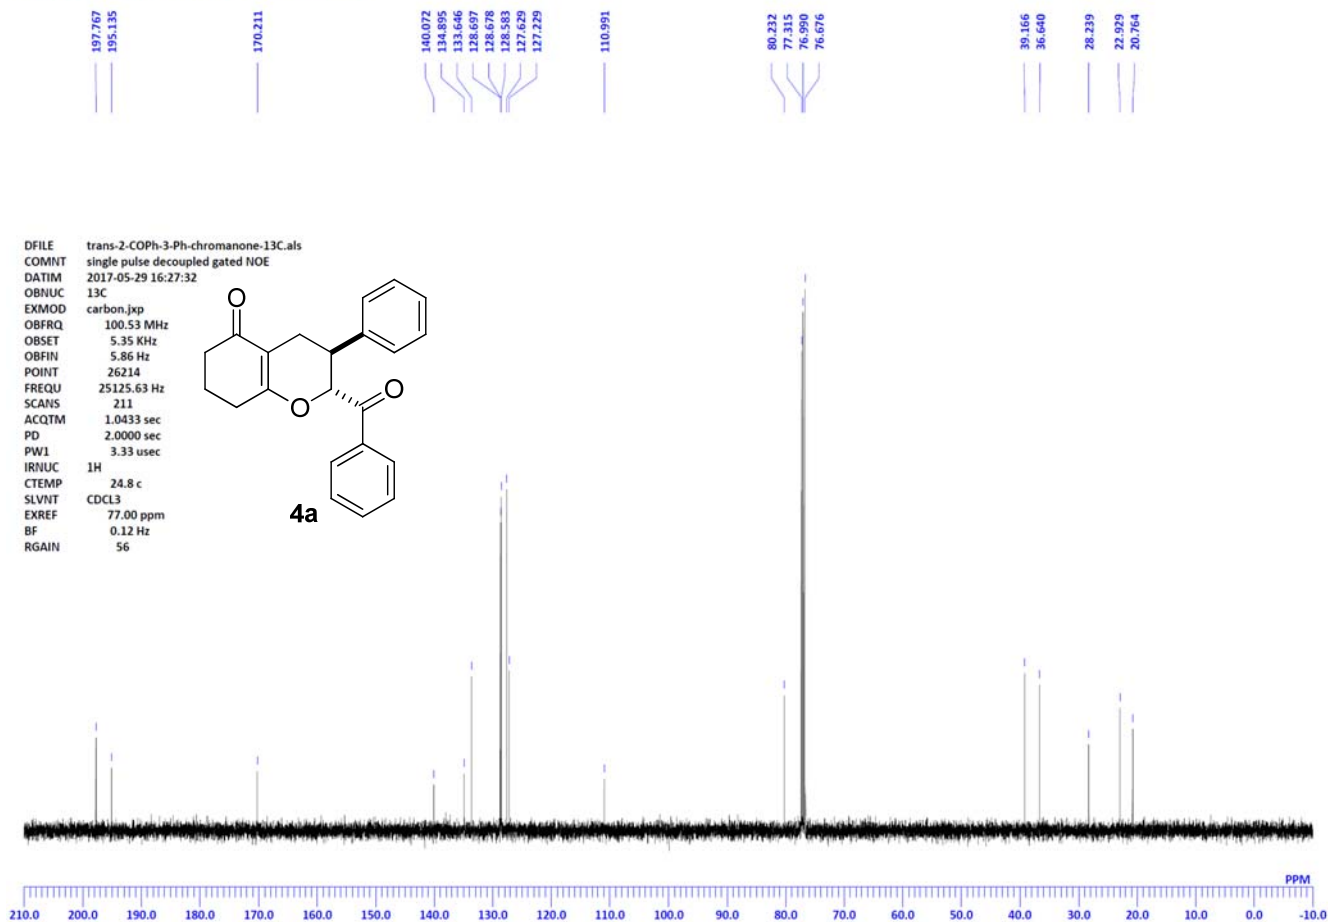

E:\NMRdata chroman\trans-2-CO-p-MeOC6H4-3-Ph-chromanone-1H.als

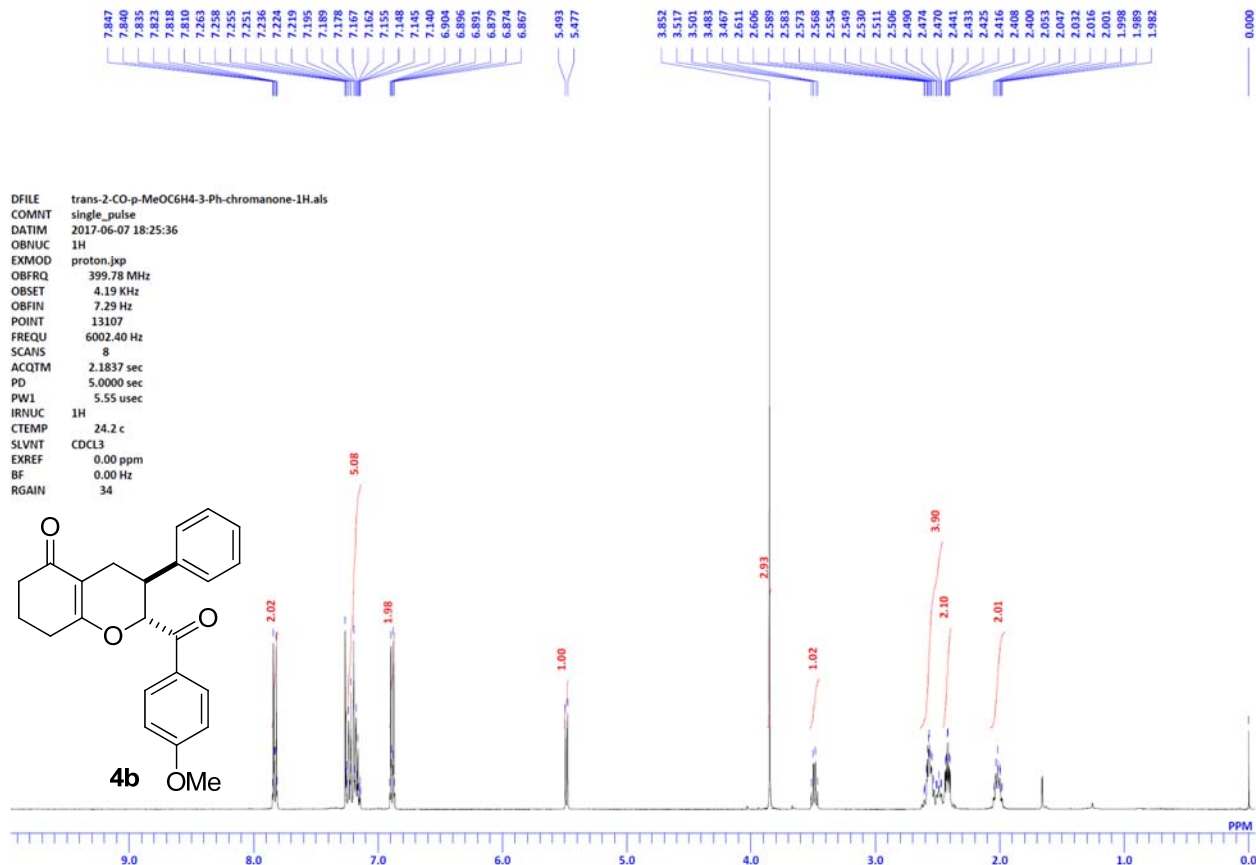

E:\NMRdata chroman\trans-2-CO-p-MeOC6H4-3-Ph-chromanone-13C.als

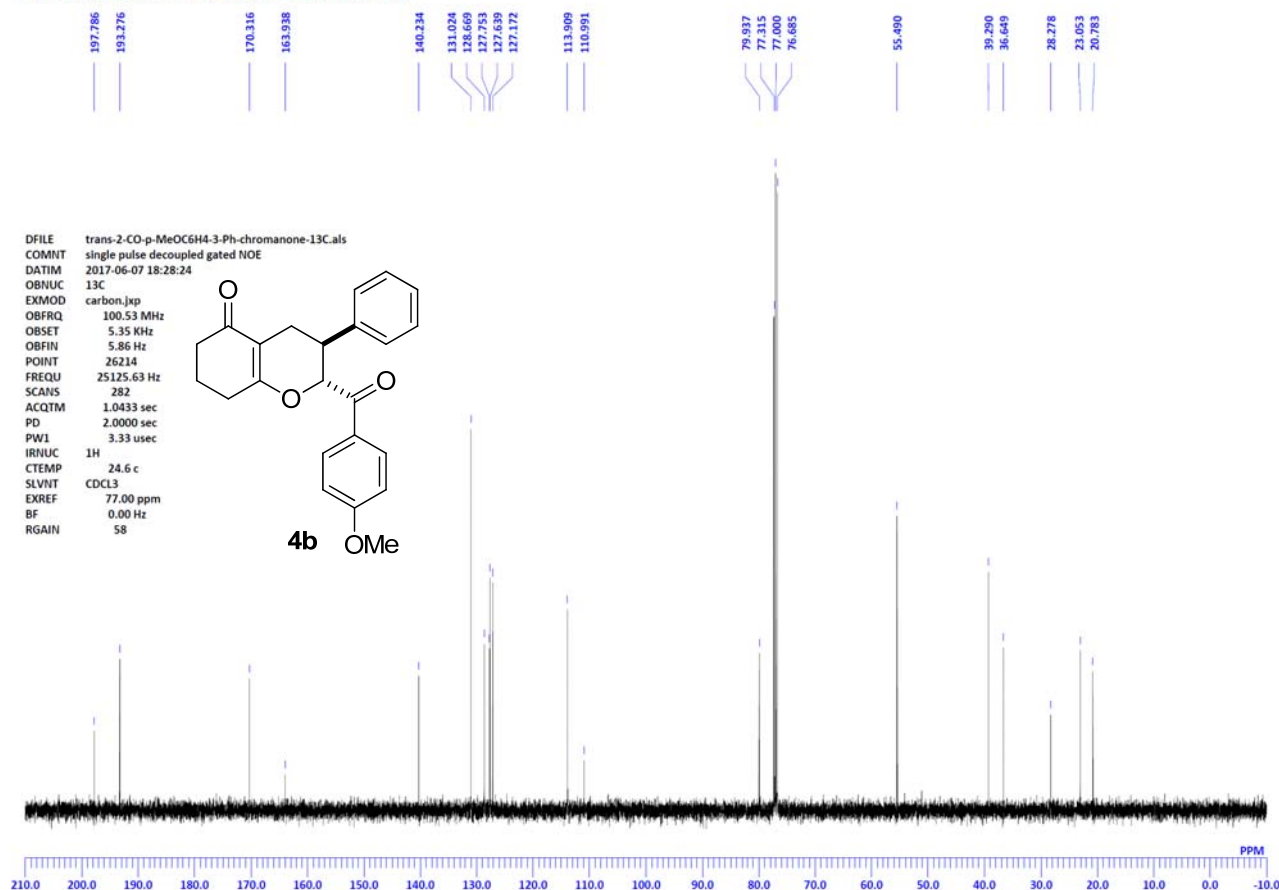

E:\NMRdata chroman\trans-2-CO-p-ClC6H4-3-Ph-chromanone-1H.als

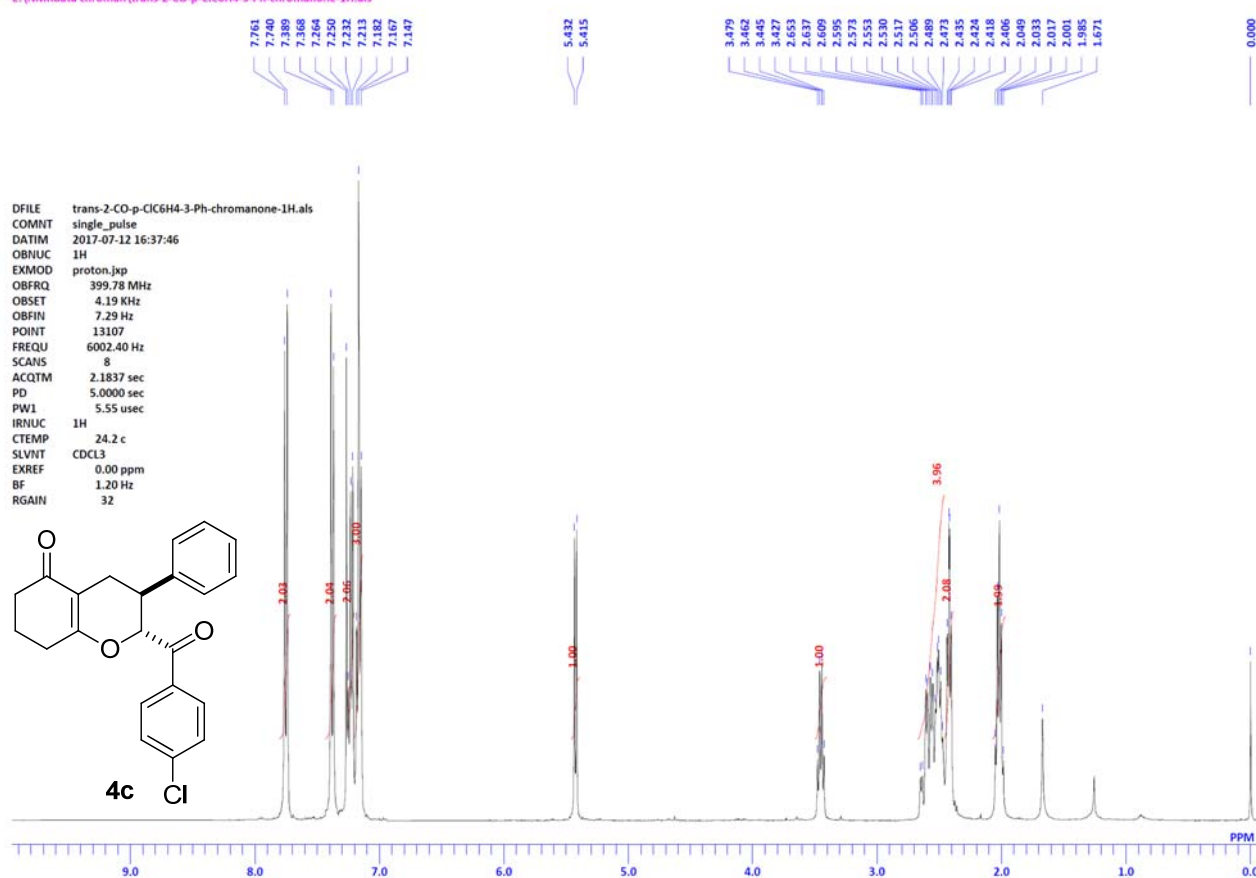

E:\NMRdata chroman\trans-2-CO-p-ClC6H4-3-Ph-chromanone-13C.als

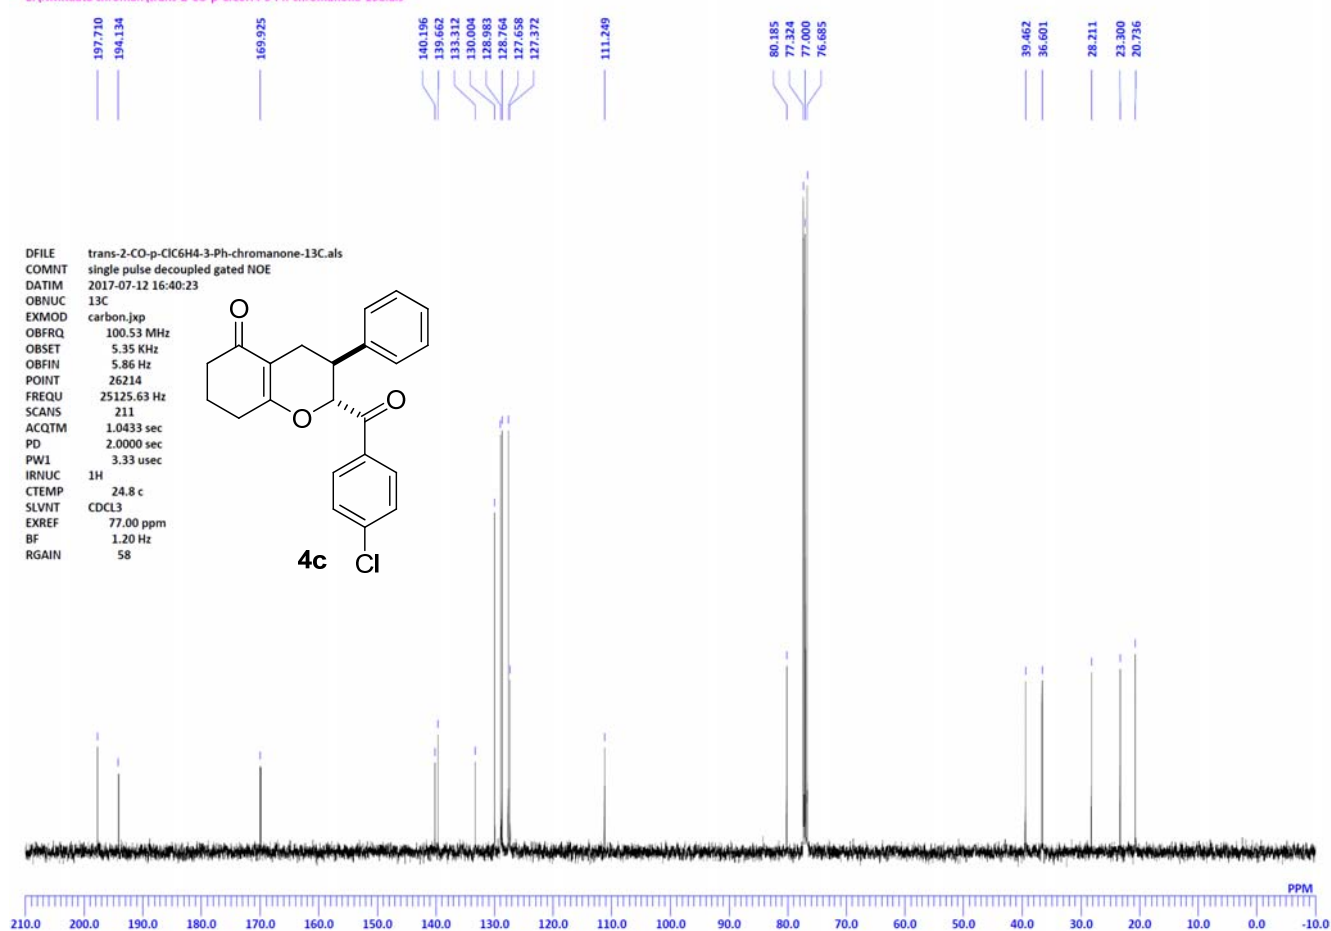

E:\NMRdata chroman\trans-2-CO-p-NO2C6H4-3-Ph-chromanone-1H.als

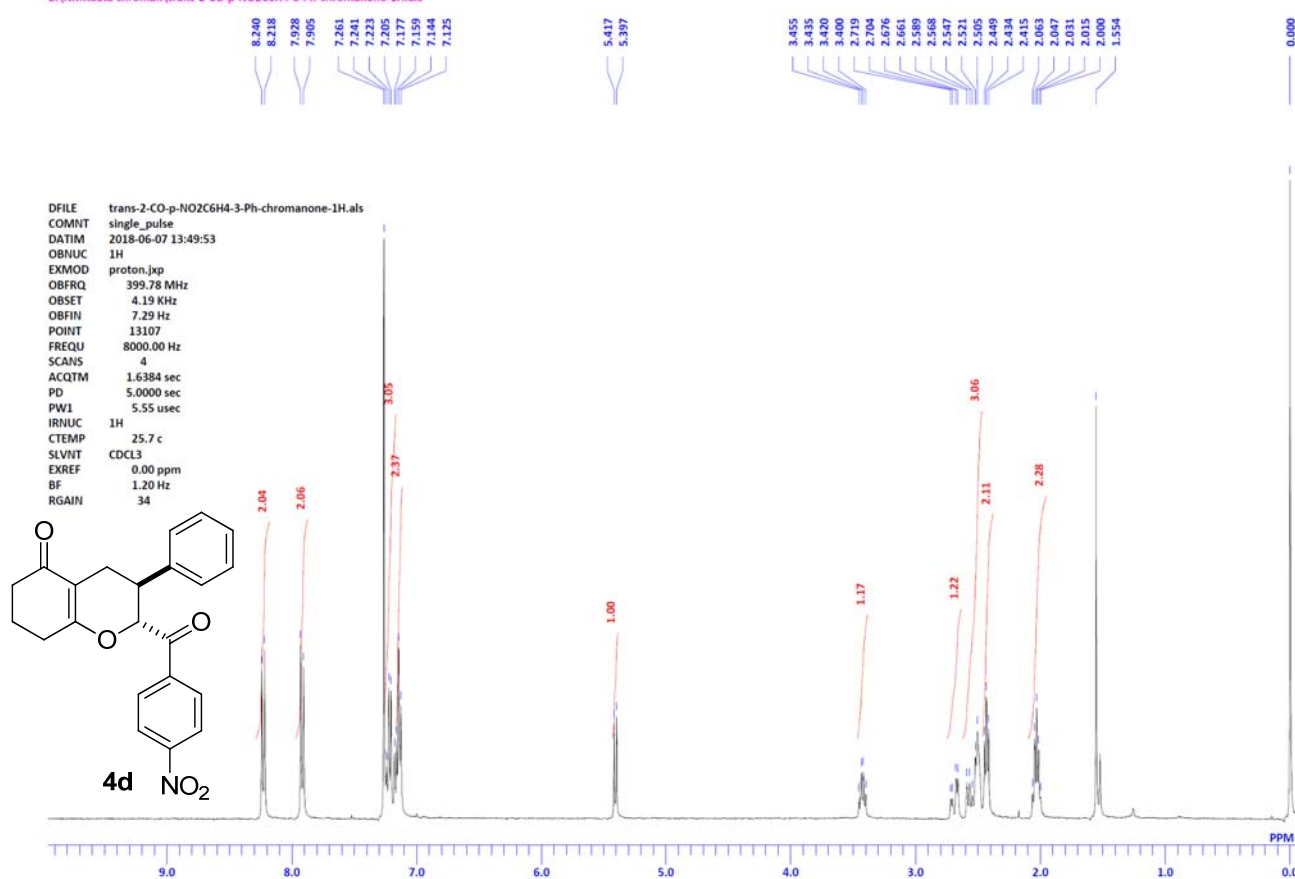

E:\NMRdata chroman\trans-2-CO-p-NO2C6H4-3-Ph-chromanone-13C.als

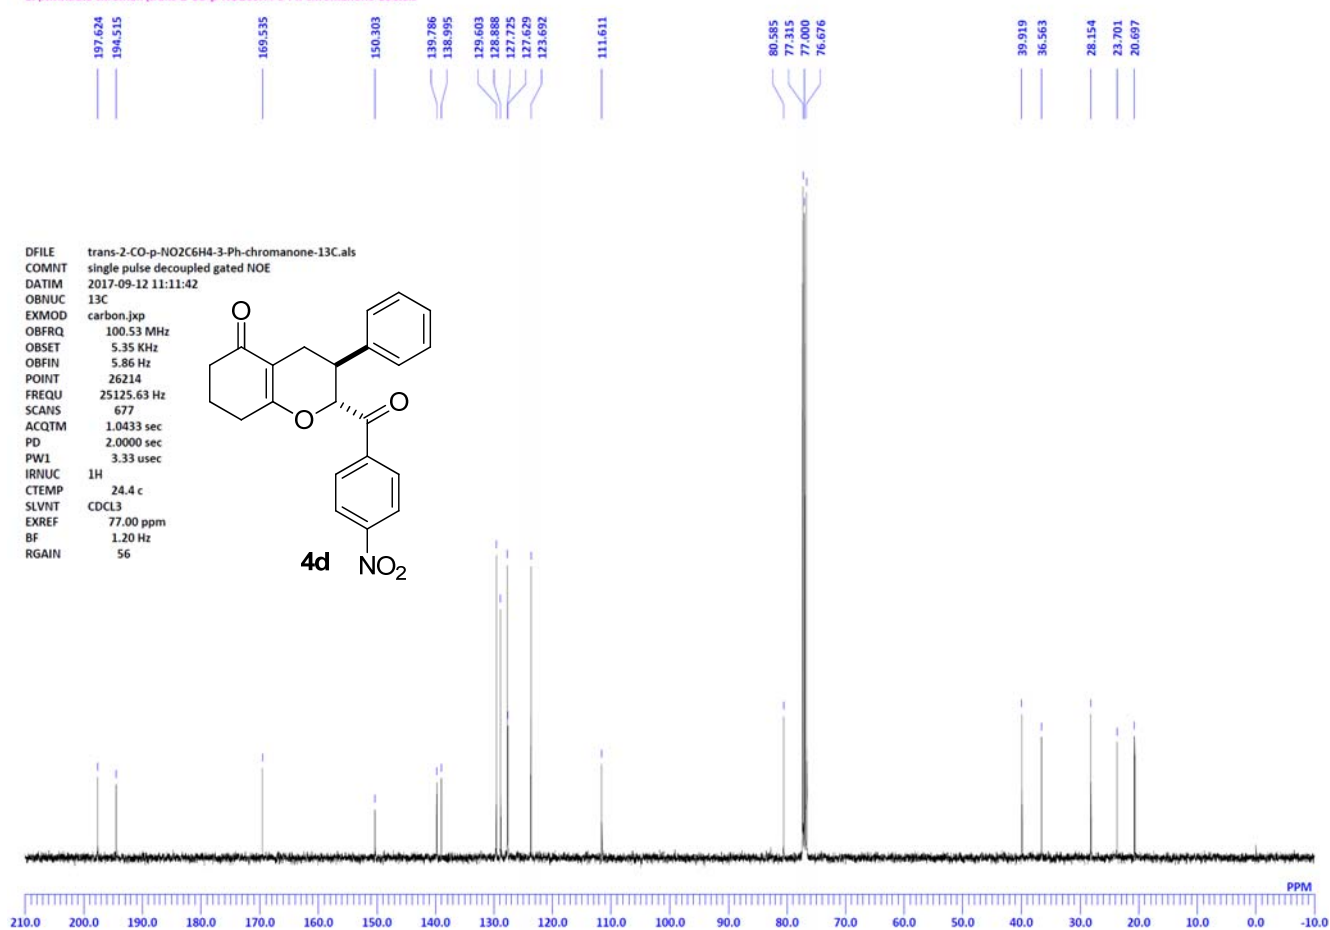



E:\NMRdata chroman\trans-2-COMe-3-Ph-chromanone-1H.als

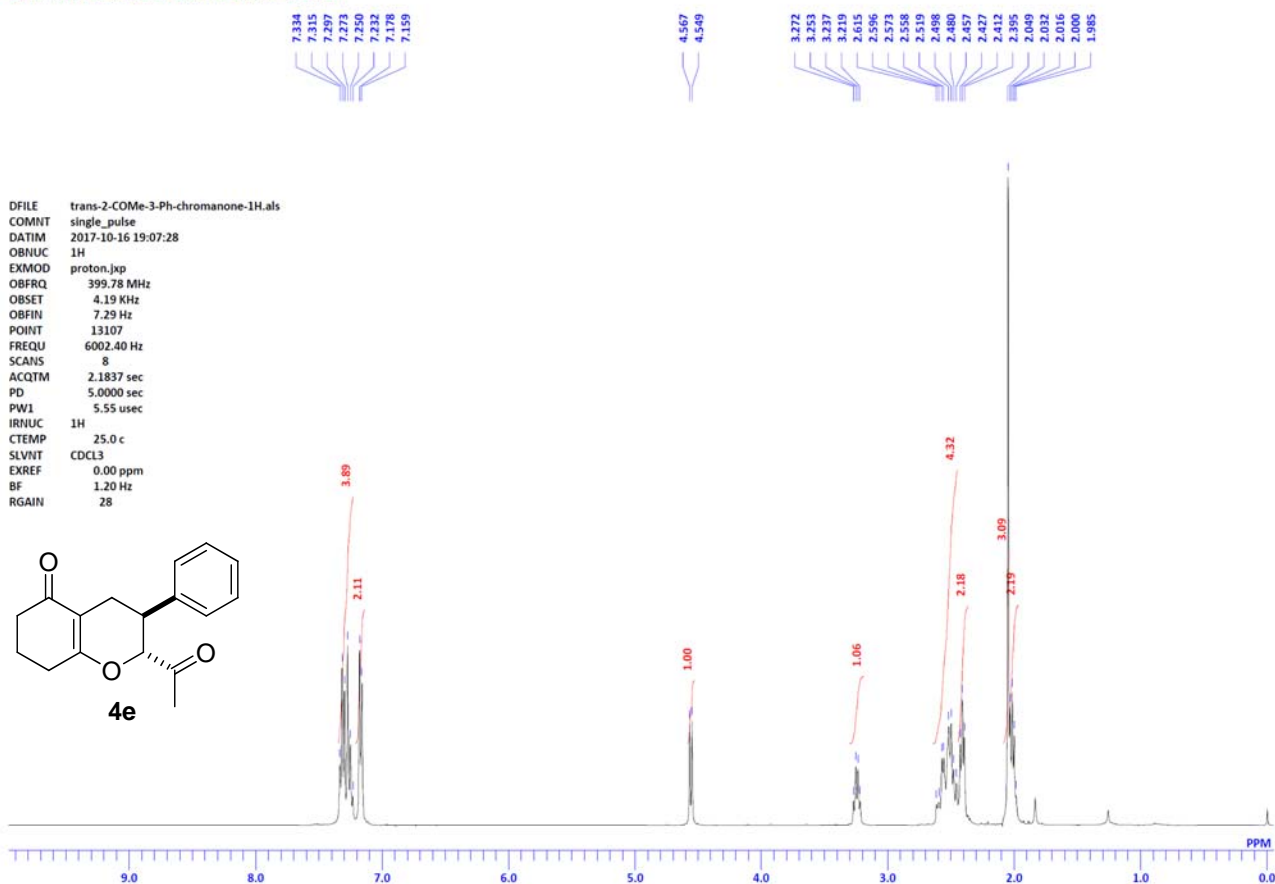

E:\NMRdata chroman\trans-2-COMe-3-Ph-chromanone-13C.als

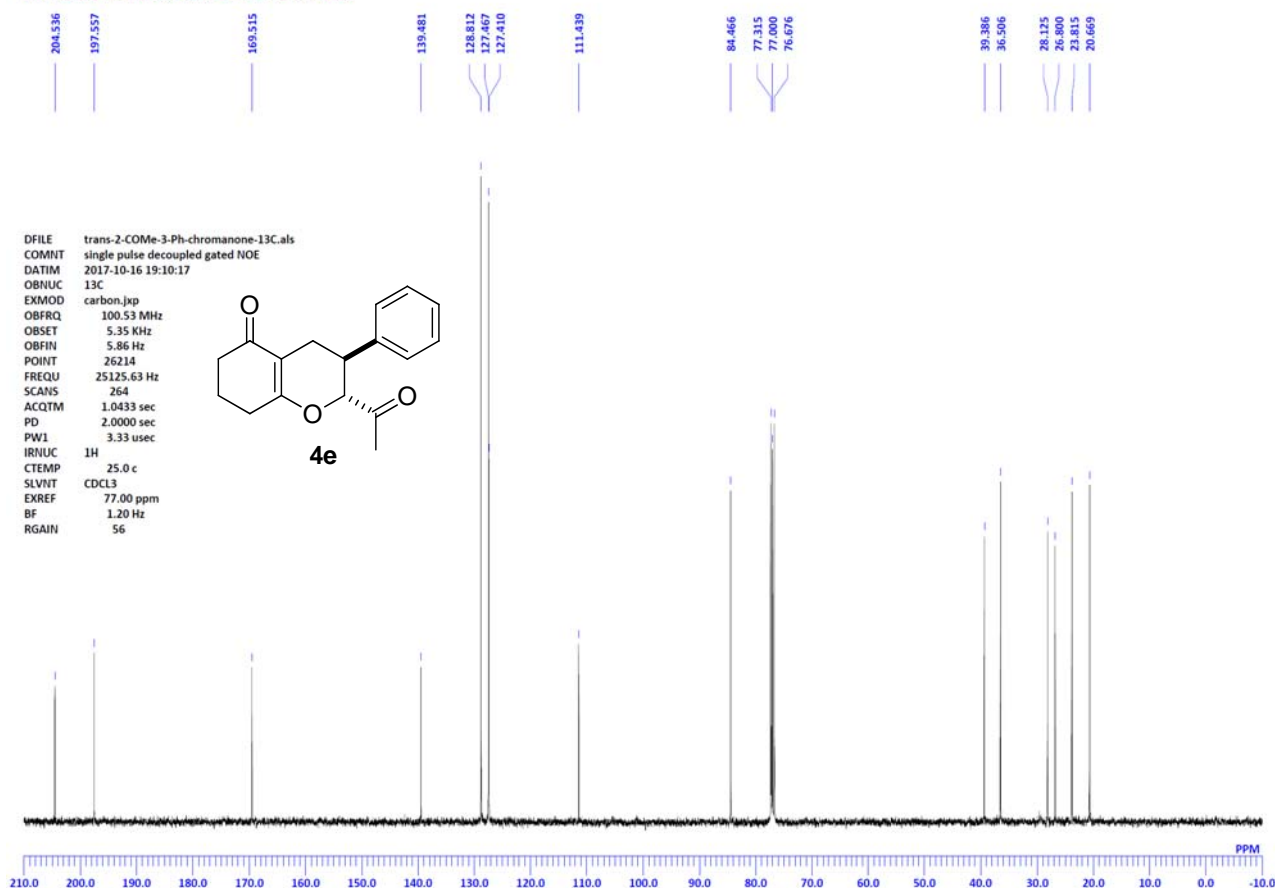

E:\NMRdata chroman\trans-2-COTBu-3-Ph-chromanone-1H.als

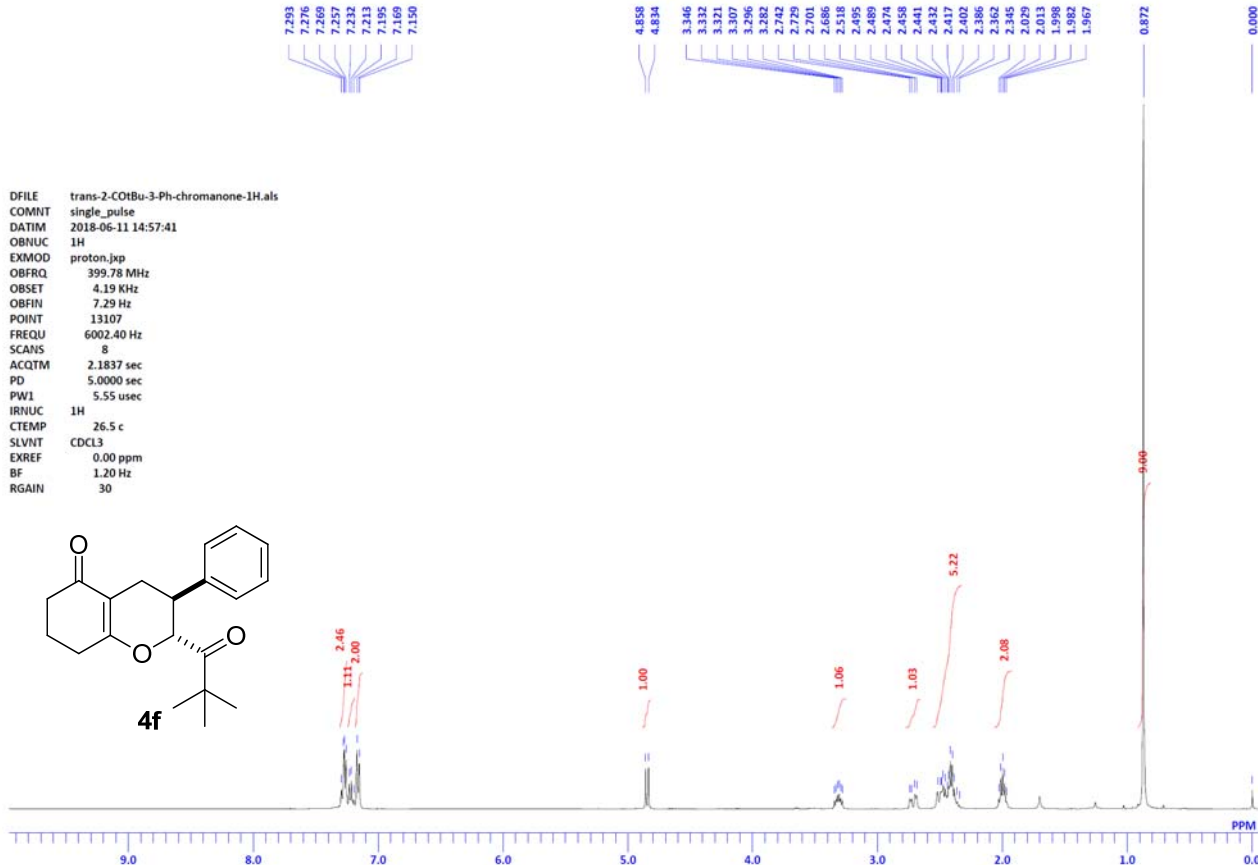

E:\NMRdata chroman\trans-2-COTBu-3-Ph-chromanone-13C.als

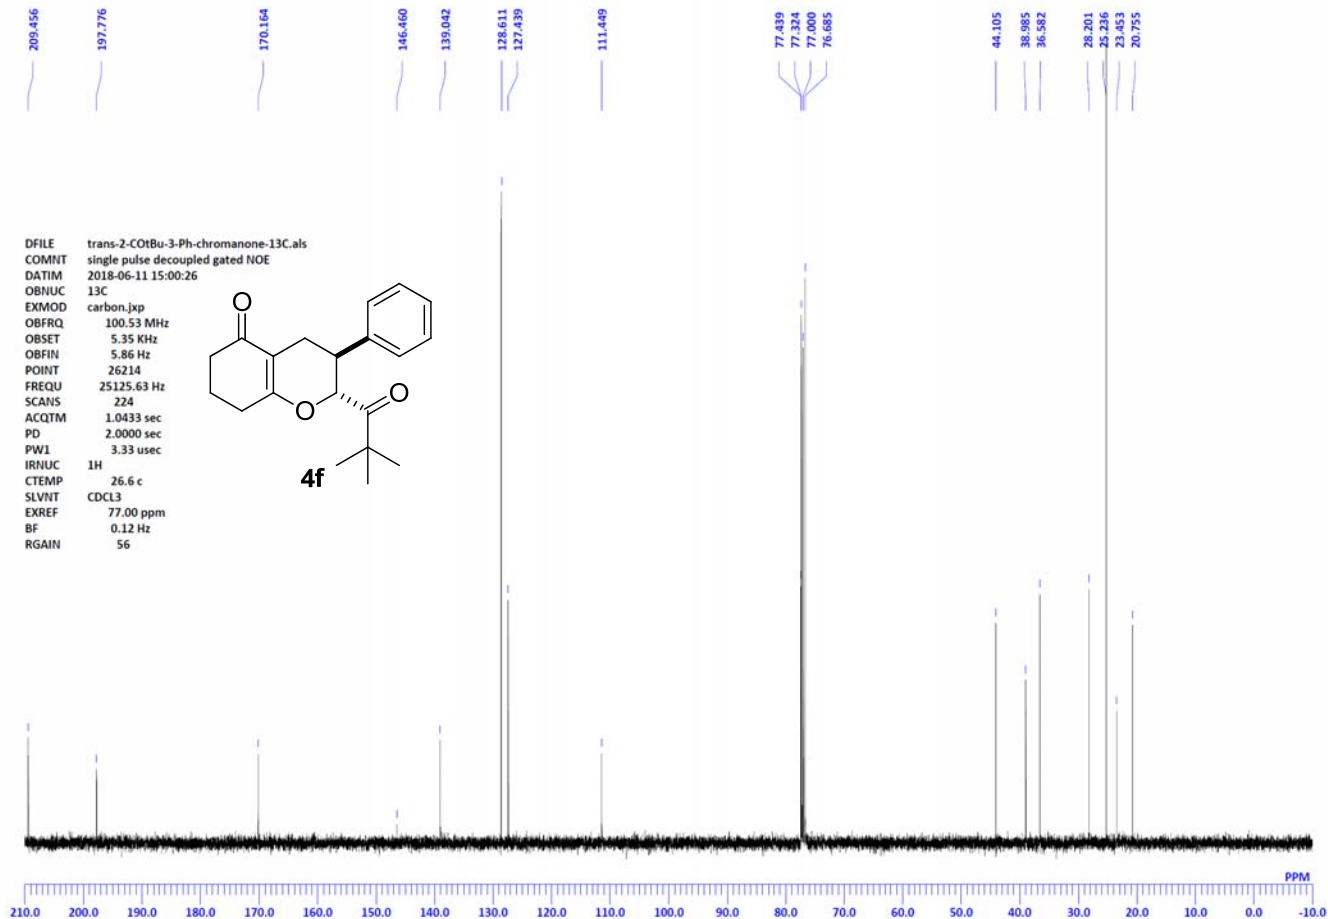



E:\NMRdata chroman\trans-2-CO2Et-3-Ph-chromanone-1H.als

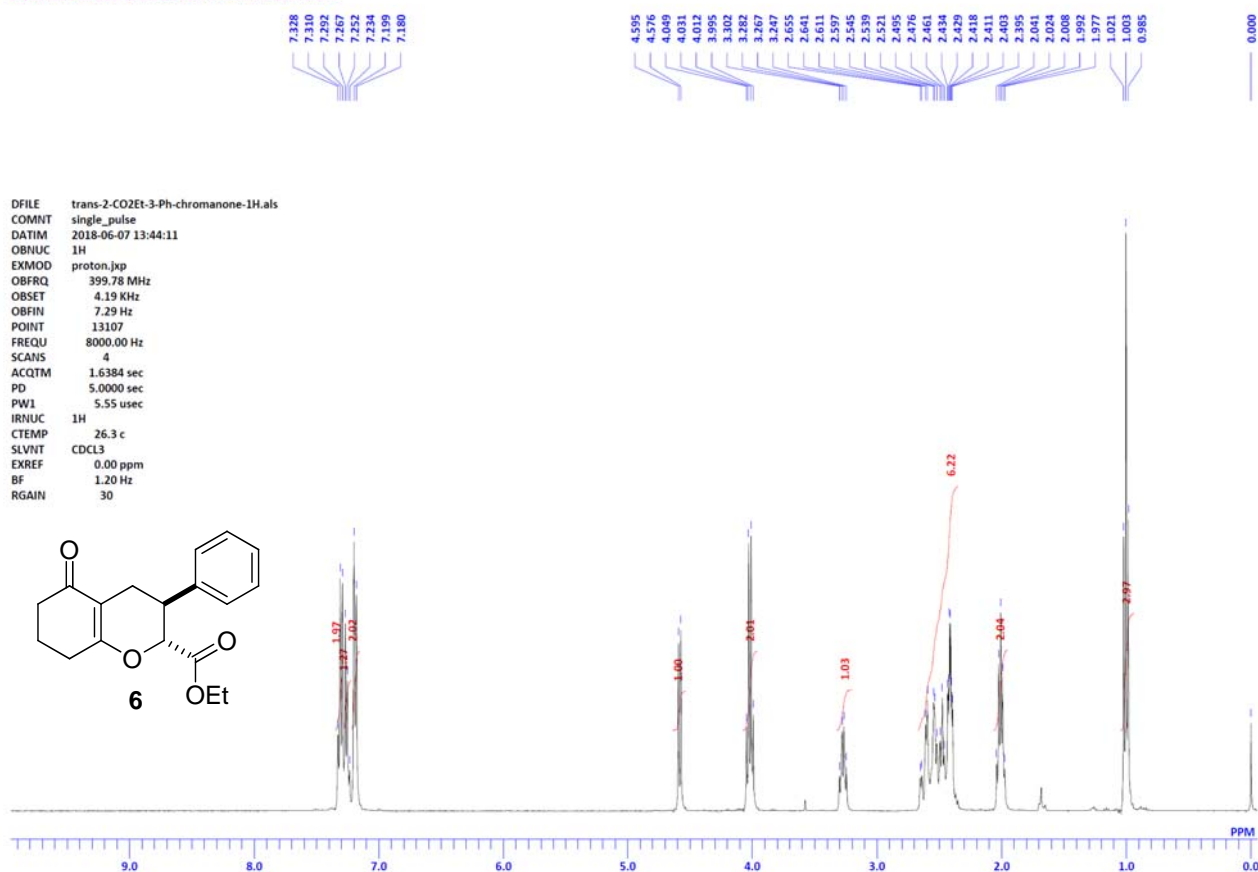

E:\NMRdata chroman\trans-2-CO2Et-3-Ph-chromanone-13C.als

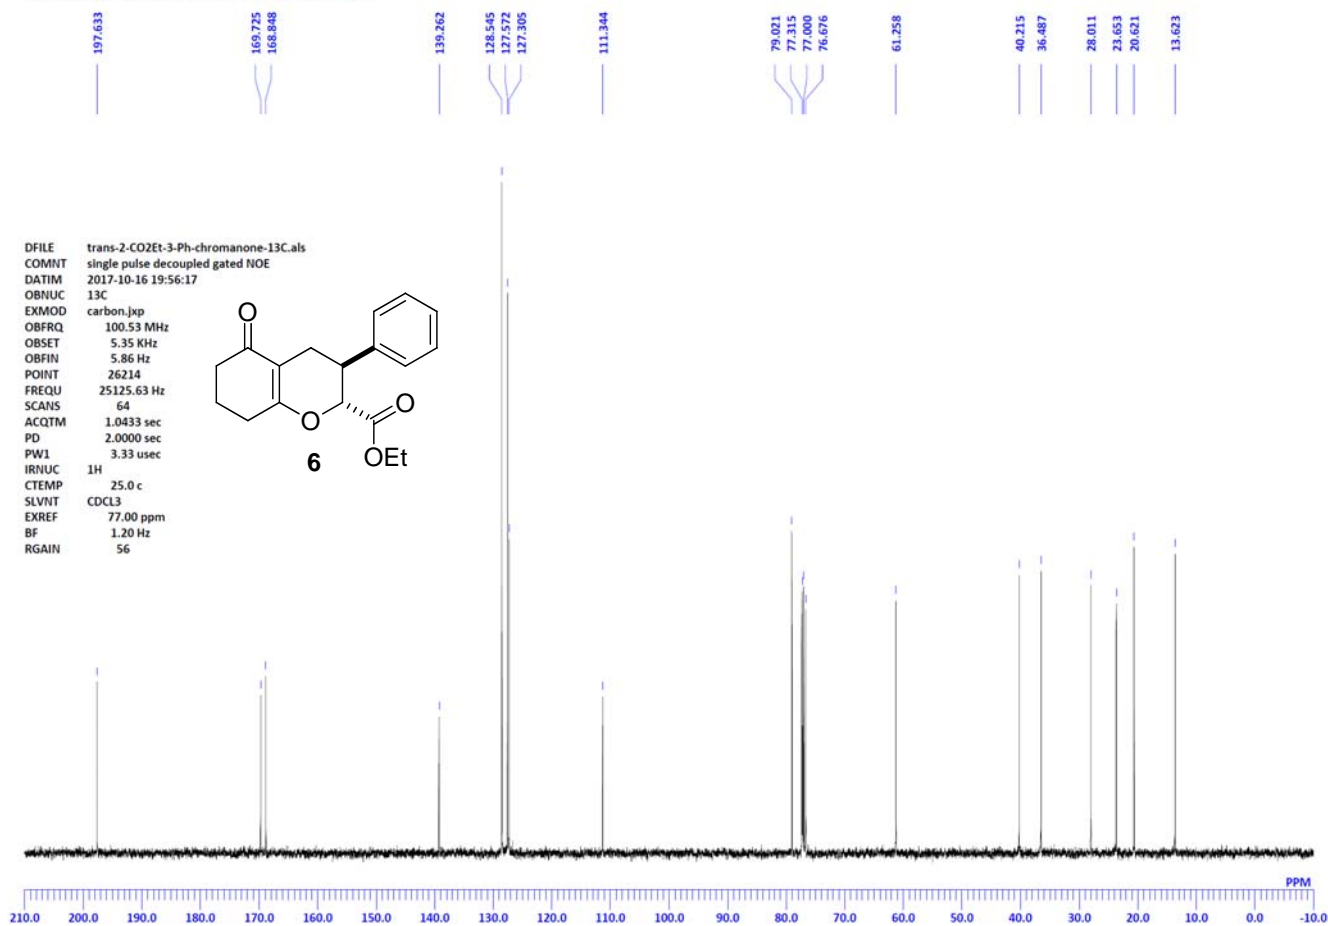

E:\NMRdata chroman\trans-2-CN-3-Ph-chromanone-1H.als

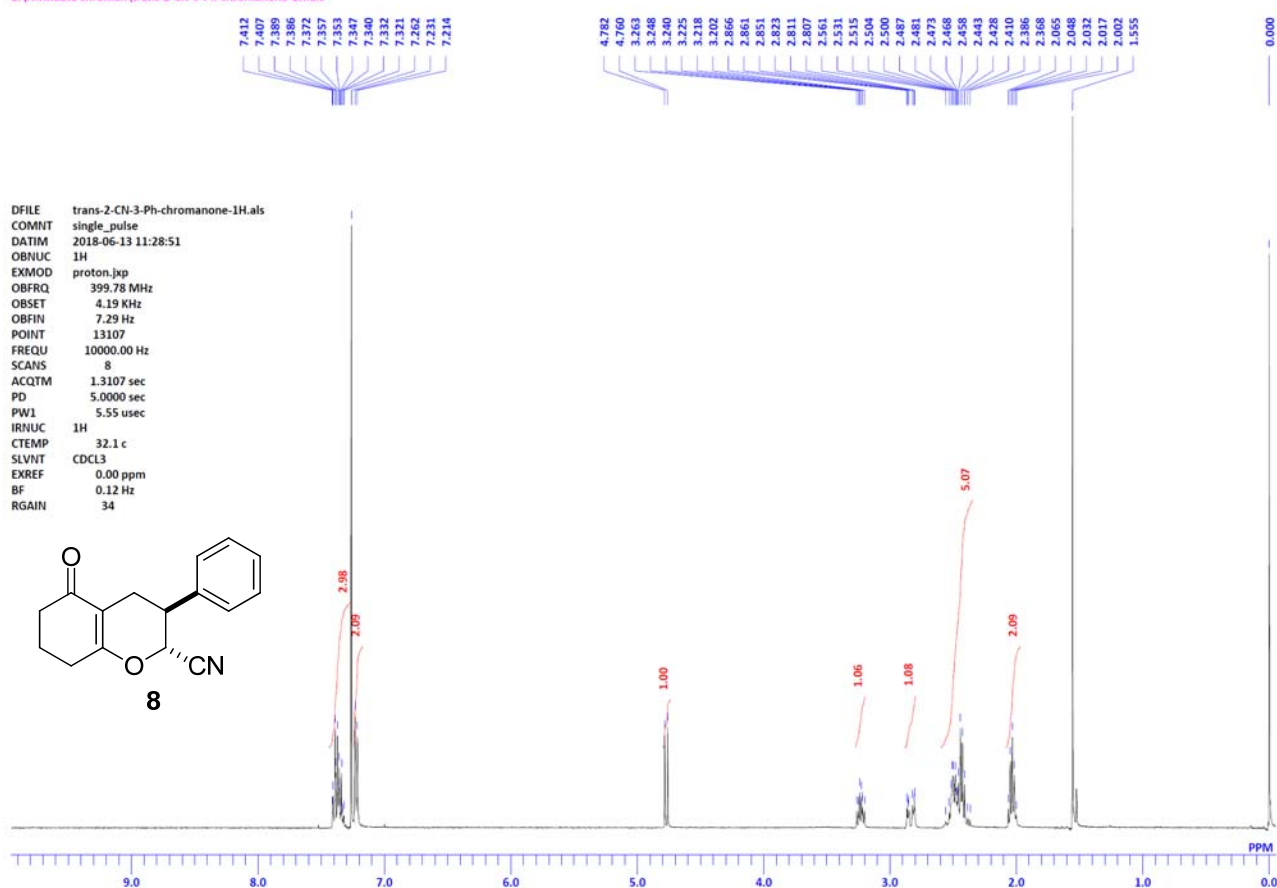

E:\NMRdata chroman\trans-2-CN-3-Ph-chromanone-13C.als

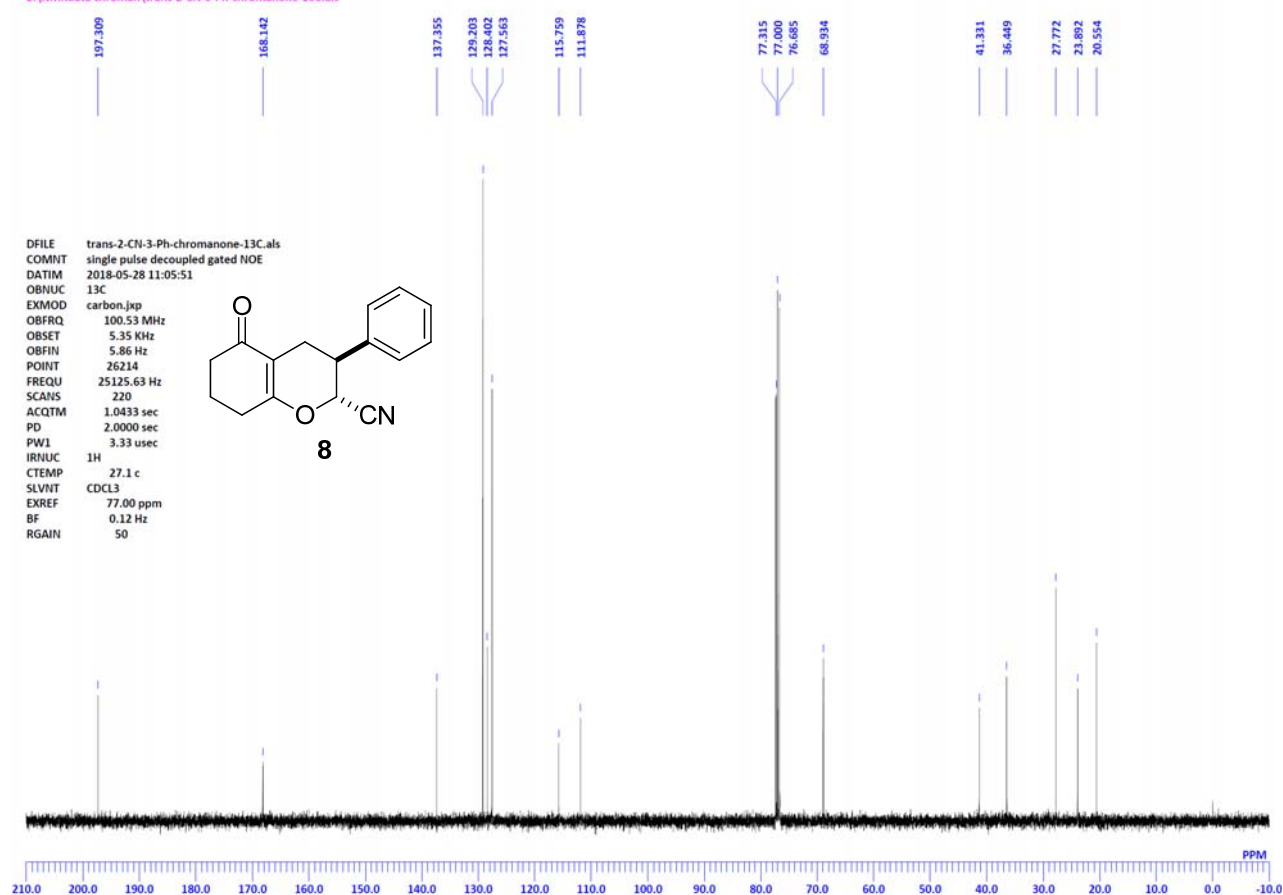

E:\NMRdata chroman\cis-2-CN-3-Ph-chromanone-1H.als

DFILE cis-2-CN-3-Ph-chromanone-1H.als  
 COMNT single\_pulse  
 DATIM 2018-05-28 10:24:23  
 OBNUC 1H  
 EXMOD proton.jxp  
 OBFRQ 399.78 MHz  
 OBSET 4.19 KHz  
 OBFIN 7.29 Hz  
 POINT 13107  
 FREQU 6002.40 Hz  
 SCANS 8  
 ACQTM 2.1837 sec  
 PD 5.0000 sec  
 PW1 5.55 usec  
 IRNUC 1H  
 CTEMP 26.4 c  
 SLVNT CDCL3  
 EXREF 0.00 ppm  
 BF 0.12 Hz  
 RGAIN 40

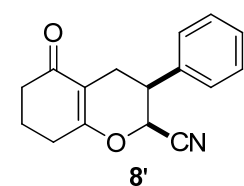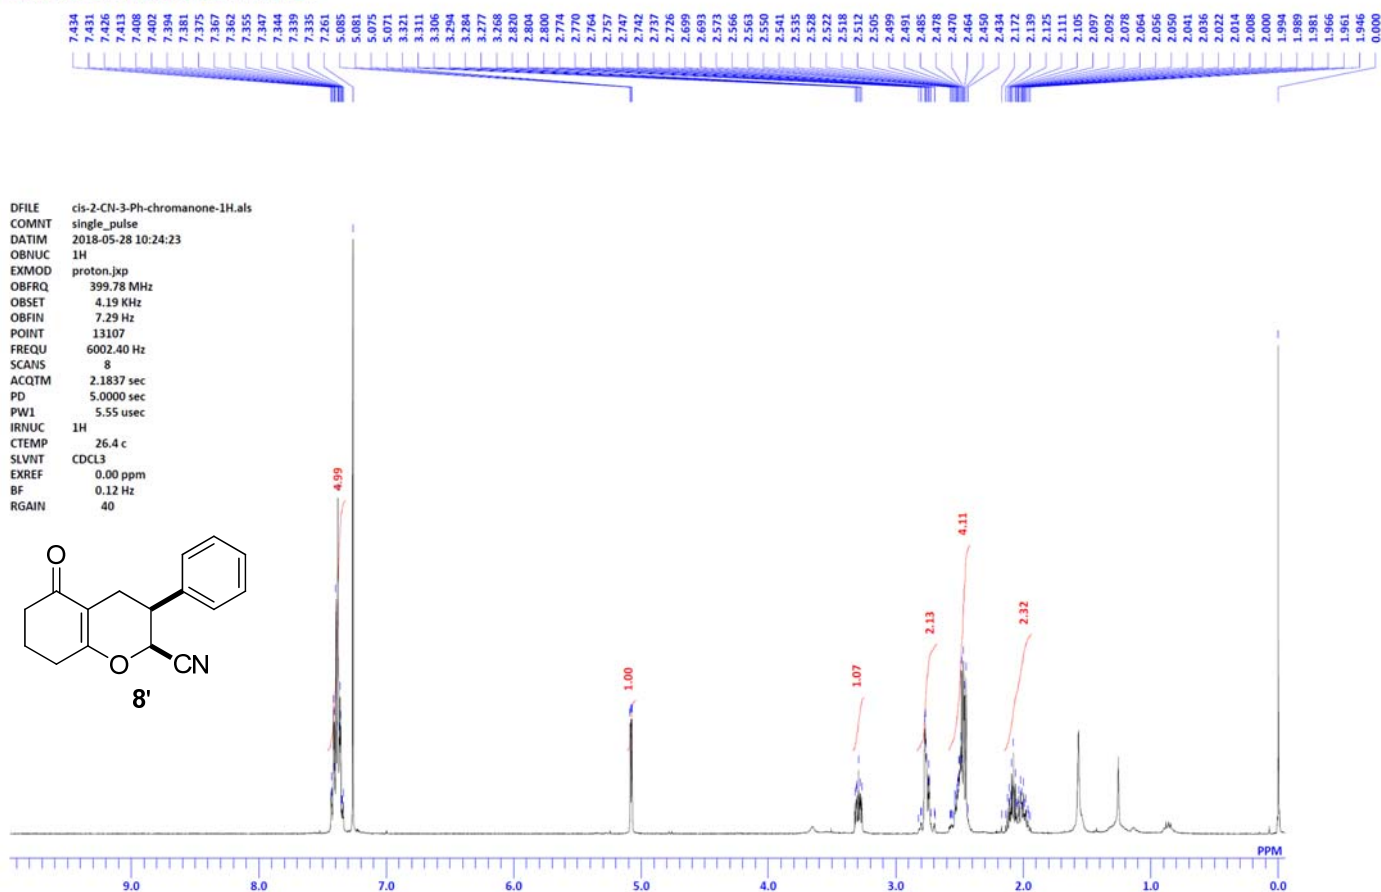

E:\NMRdata chroman\cis-2-CN-3-Ph-chromanone-13C.als

DFILE cis-2-CN-3-Ph-chromanone-13C.als  
 COMNT single pulse decoupled gated NOE  
 DATIM 2018-05-28 10:27:16  
 OBNUC 13C  
 EXMOD carbon.jxp  
 OBFRQ 100.53 MHz  
 OBSET 5.35 KHz  
 OBFIN 5.86 Hz  
 POINT 26214  
 FREQU 25125.63 Hz  
 SCANS 537  
 ACQTM 1.0433 sec  
 PD 2.0000 sec  
 PW1 3.33 usec  
 IRNUC 1H  
 CTEMP 26.9 c  
 SLVNT CDCL3  
 EXREF 77.00 ppm  
 BF 0.12 Hz  
 RGAIN 56

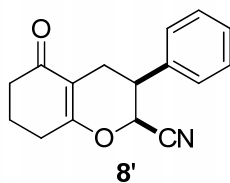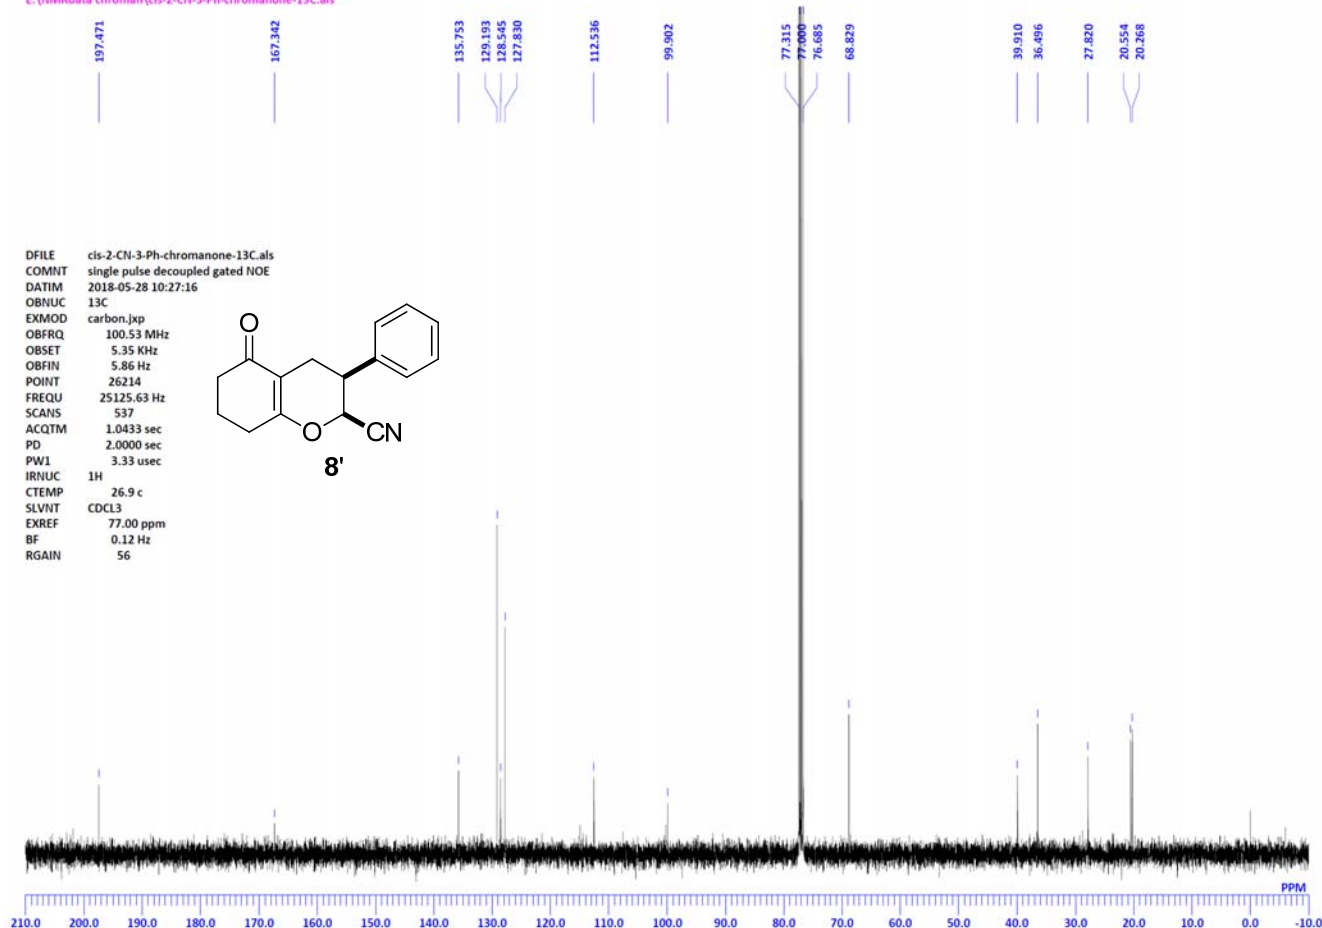

E:\NMRdata chroman\trans-2-COPh-3-pMeC6H4-chromanone-1H.als

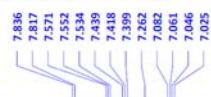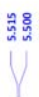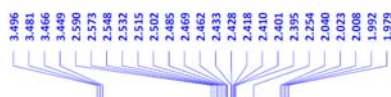

0.000

DFILE trans-2-COPh-3-pMeC6H4-chromanone-1H.als  
COMNT single\_pulse  
DATIM 2018-06-13 11:38:34  
OBNUC 1H  
EXMOD proton.jxp  
OBFRQ 399.78 MHz  
OBSET 4.19 KHz  
OBFIN 7.29 Hz  
POINT 13107  
FREQU 10000.00 Hz  
SCANS 8  
AQTM 1.3107 sec  
PD 5.0000 sec  
PWL 5.55 usec  
IRNUC 1H  
CTEMP 32.2 c  
SLVNT CDCL3  
EXREF 0.00 ppm  
BF 0.12 Hz  
RGAIN 28

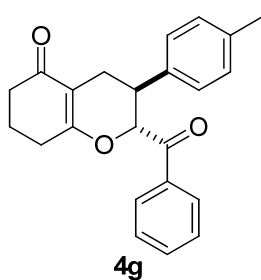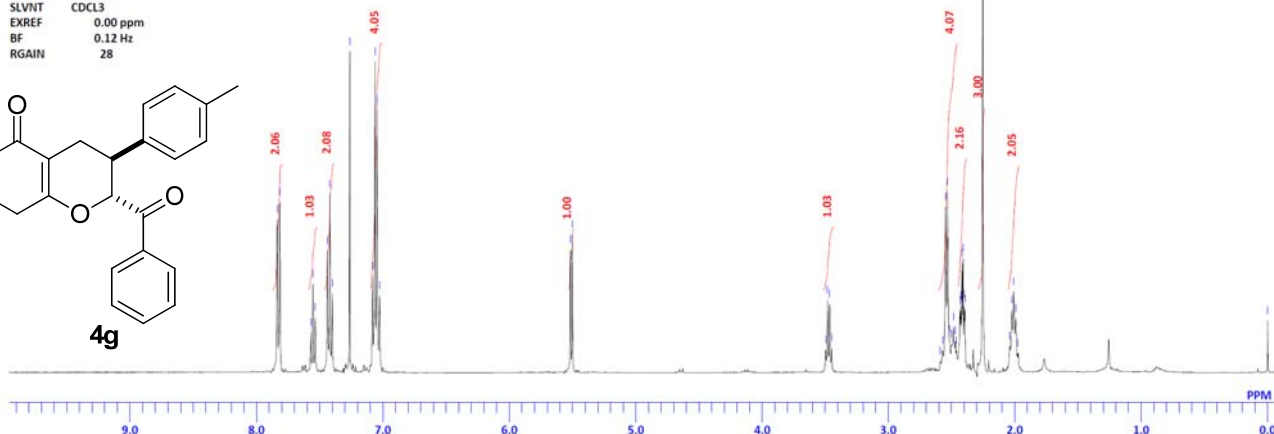

E:\NMRdata chroman\trans-2-COPh-3-pMeC6H4-chromanone-13C.als

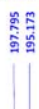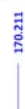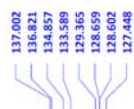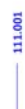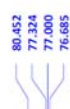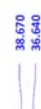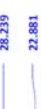

DFILE trans-2-COPh-3-pMeC6H4-chromanone-13C.als  
COMNT single pulse decoupled gated NOE  
DATIM 2018-06-06 19:34:10  
OBNUC 13C  
EXMOD carbon.jxp  
OBFRQ 100.53 MHz  
OBSET 5.35 KHz  
OBFIN 5.86 Hz  
POINT 26214  
FREQU 25125.63 Hz  
SCANS 215  
AQTM 1.0433 sec  
PD 2.0000 sec  
PWL 3.33 usec  
IRNUC 1H  
CTEMP 26.8 c  
SLVNT CDCL3  
EXREF 77.00 ppm  
BF 1.20 Hz  
RGAIN 56

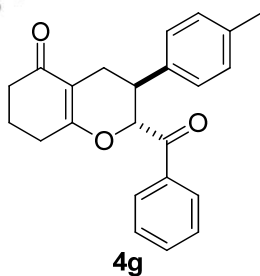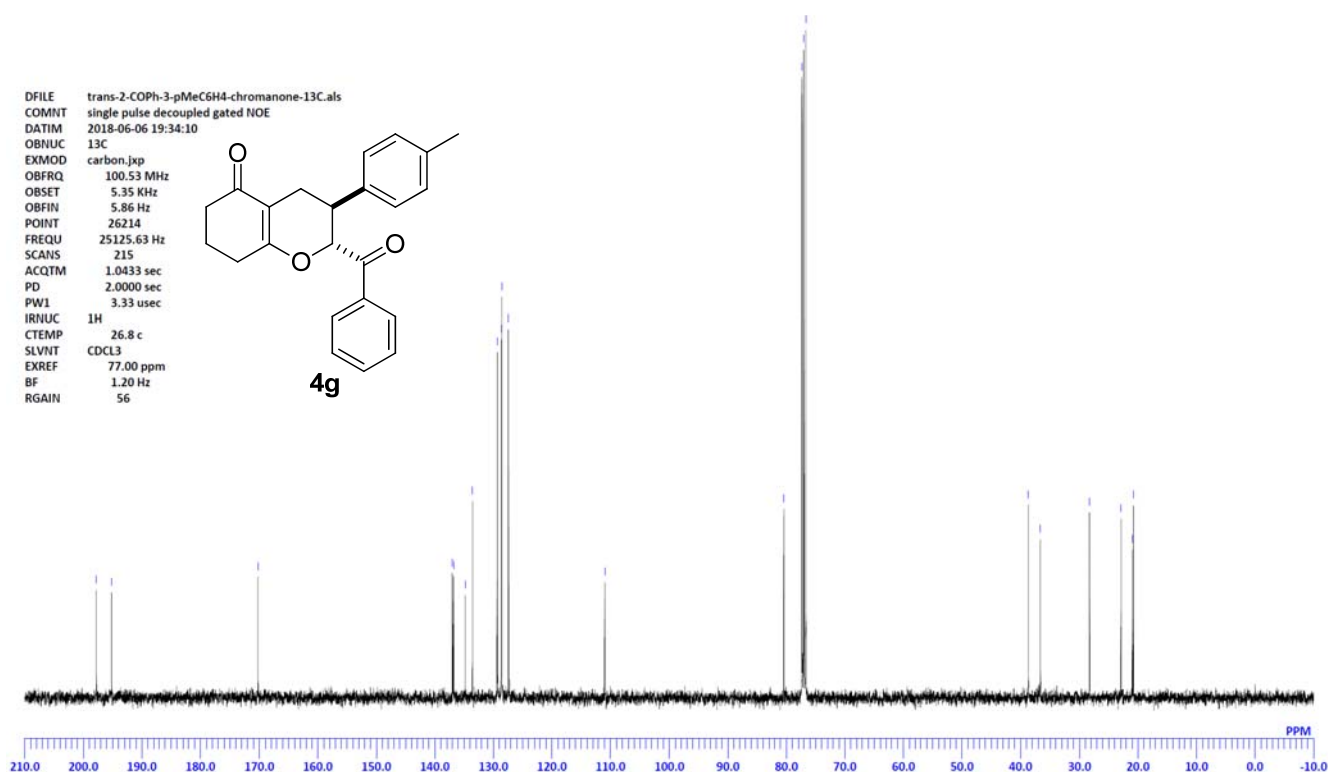

E:\NMRdata chroman\trans-2-COPh-3-pBrC6H4-chromanone-1H.als

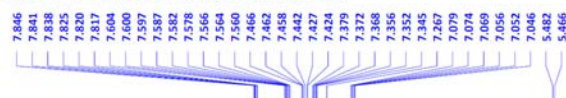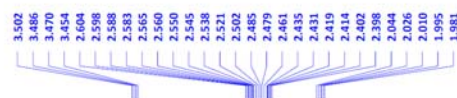

0.000

DFILE trans-2-COPh-3-pBrC6H4-chromanone-1H.als  
 COMNT single\_pulse  
 DATIM 2018-06-19 15:07:34  
 OBNUC 1H  
 EXMOD proton.jxp  
 OBFRQ 399.78 MHz  
 OBSET 4.19 KHz  
 OBFIN 7.29 Hz  
 POINT 13107  
 FREQU 6002.40 Hz  
 SCANS 8  
 ACQTM 2.1837 sec  
 PD 5.0000 sec  
 PW1 5.55 usec  
 IRNUC 1H  
 CTEMP 24.6 c  
 SLVNT CDCL3  
 EXREF 0.00 ppm  
 BF 0.12 Hz  
 RGAIN 32

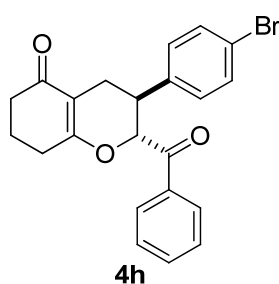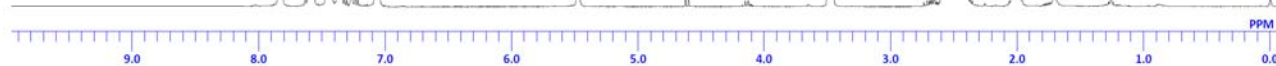

E:\NMRdata chroman\trans-2-COPh-3-pBrC6H4-chromanone-13C.als

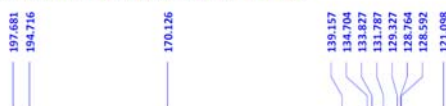

DFILE trans-2-COPh-3-pBrC6H4-chromanone-13C.als  
 COMNT single pulse decoupled gated NOE  
 DATIM 2018-06-19 15:10:27  
 OBNUC 13C  
 EXMOD carbon.jxp  
 OBFRQ 100.53 MHz  
 OBSET 5.35 KHz  
 OBFIN 5.86 Hz  
 POINT 26214  
 FREQU 25125.63 Hz  
 SCANS 180  
 ACQTM 1.0433 sec  
 PD 2.0000 sec  
 PW1 3.33 usec  
 IRNUC 1H  
 CTEMP 24.9 c  
 SLVNT CDCL3  
 EXREF 77.00 ppm  
 BF 0.12 Hz  
 RGAIN 56

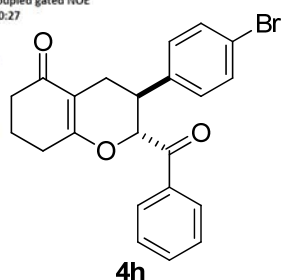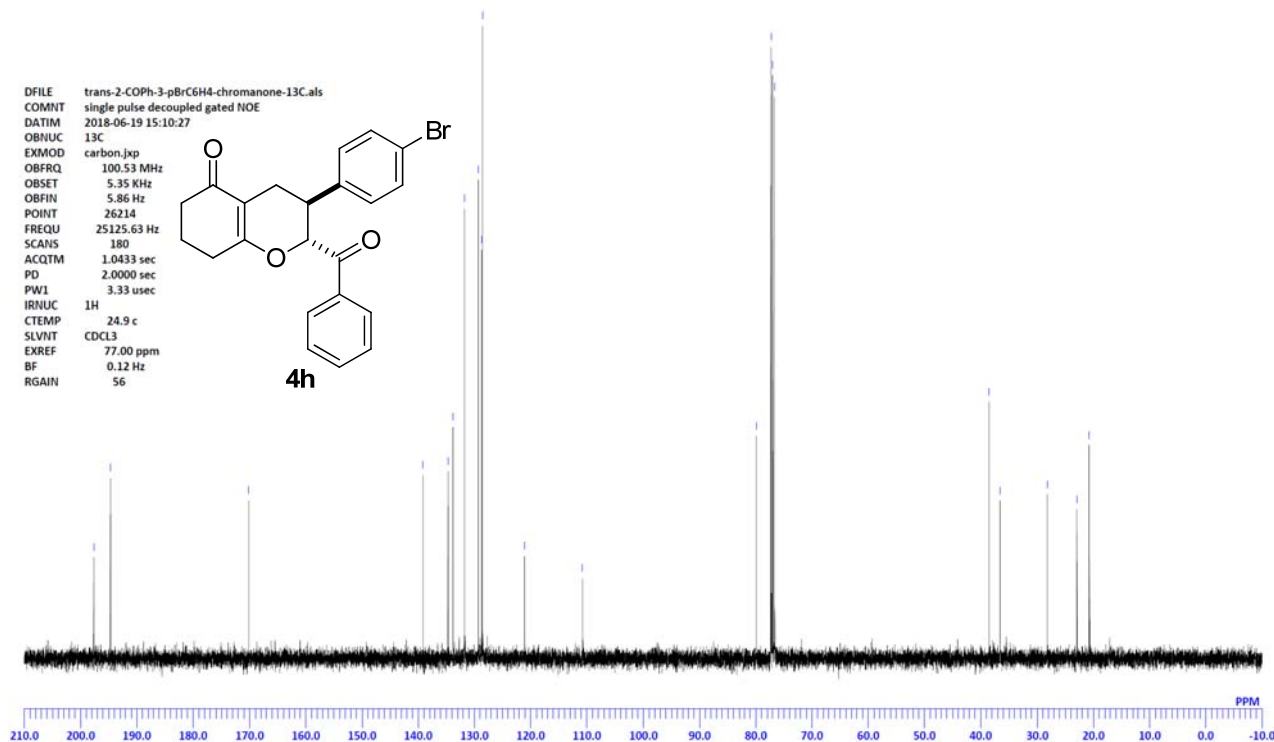



E:\NMRdata chroman\2-COPh-chromanone-1H.als

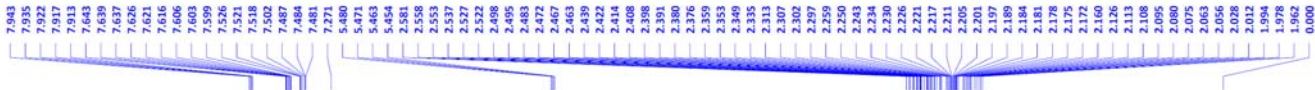

DFILE 2-COPh-chromanone-1H.als  
COMNT single\_pulse  
DATIM 2017-04-24 17:06:37  
OBNUC 1H  
EXMOD proton.jpg  
OBFRQ 399.78 MHz  
OBSET 4.19 KHz  
OBFIN 7.29 Hz  
POINT 13107  
FREQU 6002.40 Hz  
SCANS 4  
ACQTM 2.1837 sec  
PD 5.0000 sec  
PW1 5.55 usec  
IRNUC 1H  
CTEMP 24.3 c  
SLVNT CDCL3  
EXREF 0.00 ppm  
BF 0.12 Hz  
RGAIN 34

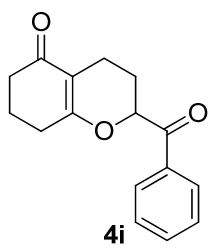

E:\NMRdata chroman\2-COPh-chromanone-13C.als

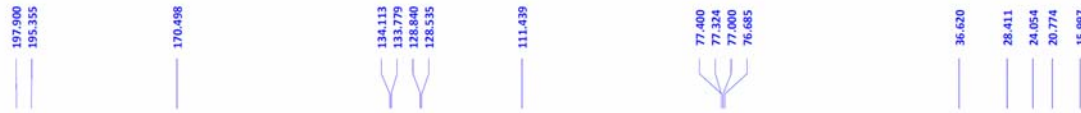

DFILE 2-COPh-chromanone-13C.als  
COMNT single pulse decoupled gated NOE  
DATIM 2017-04-24 17:08:53  
OBNUC 13C  
EXMOD carbon.jpg  
OBFRQ 100.53 MHz  
OBSET 5.35 KHz  
OBFIN 5.86 Hz  
POINT 26214  
FREQU 25125.63 Hz  
SCANS 112  
ACQTM 1.0433 sec  
PD 2.0000 sec  
PW1 3.33 usec  
IRNUC 1H  
CTEMP 24.3 c  
SLVNT CDCL3  
EXREF 77.00 ppm  
BF 0.12 Hz  
RGAIN 56

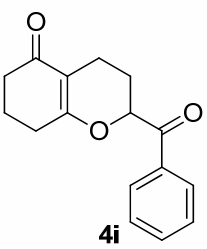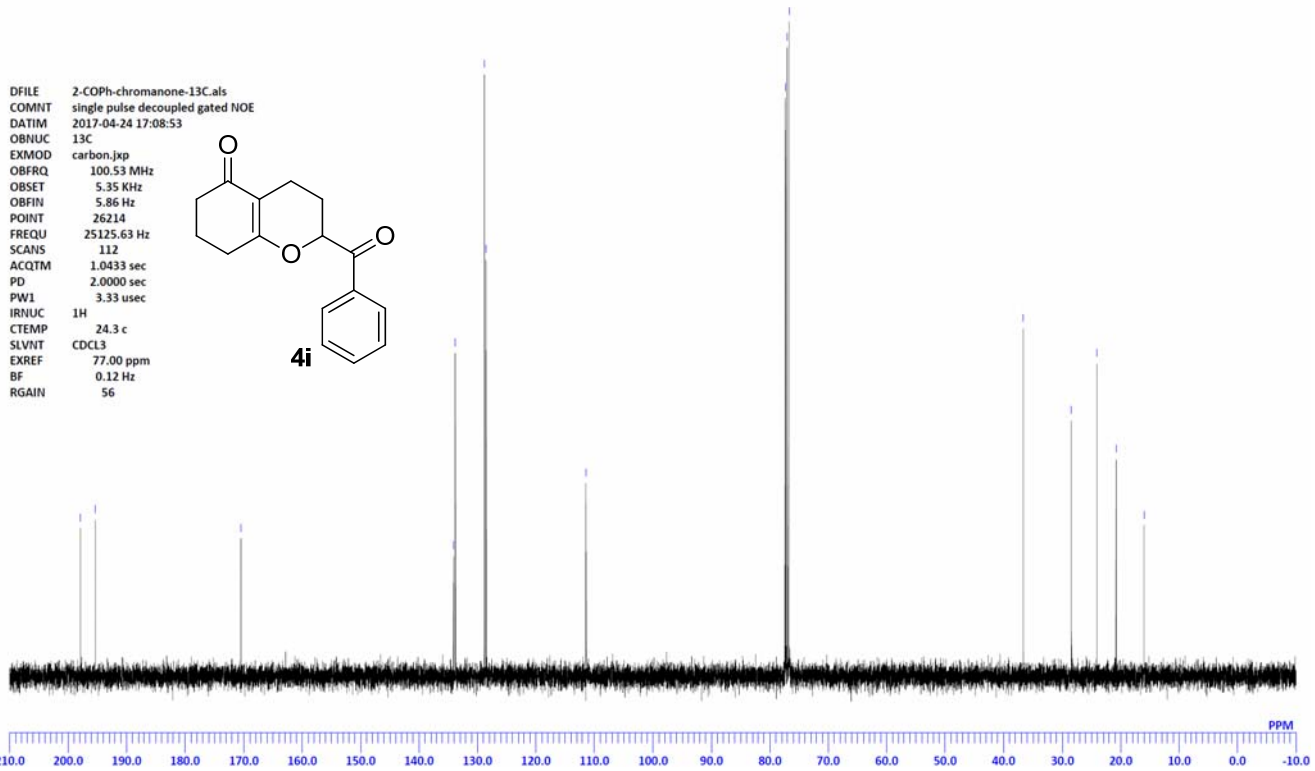

E:\NMRdata chroman\trans-2-COPh-3-nBu-chromanone-1H.als

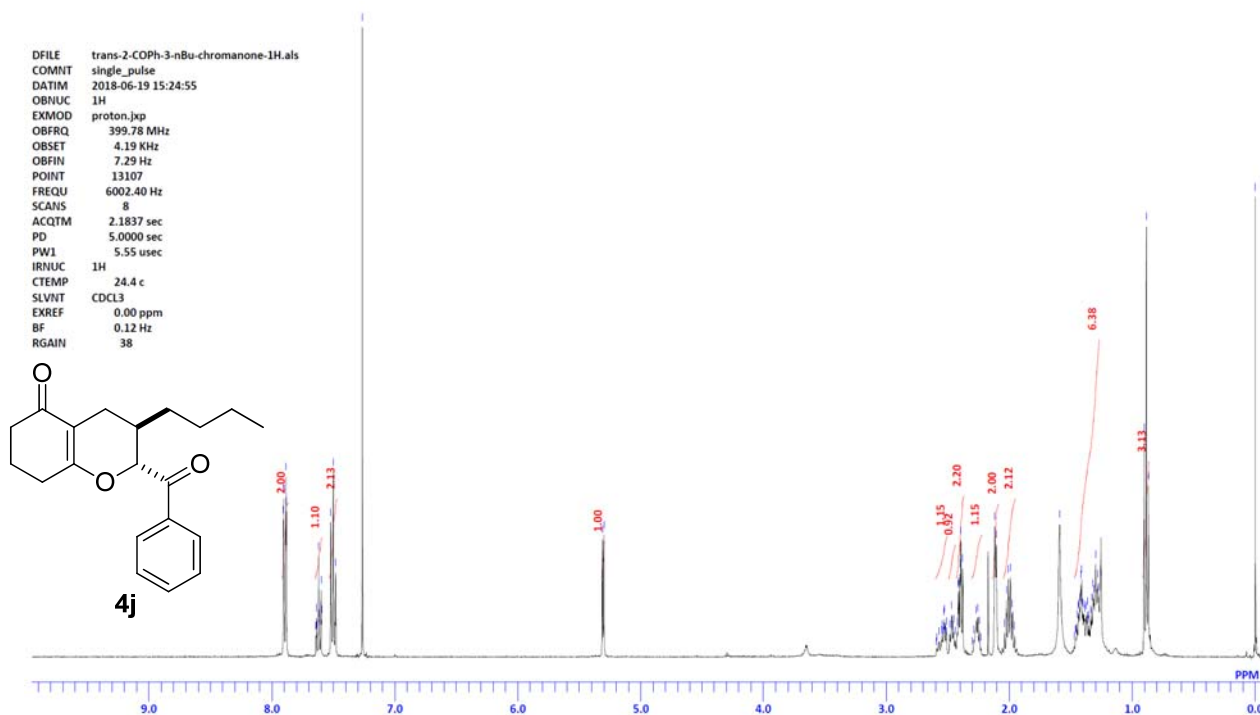

E:\NMRdata chroman\trans-2-COPh-3-nBu-chromanone-13C.als

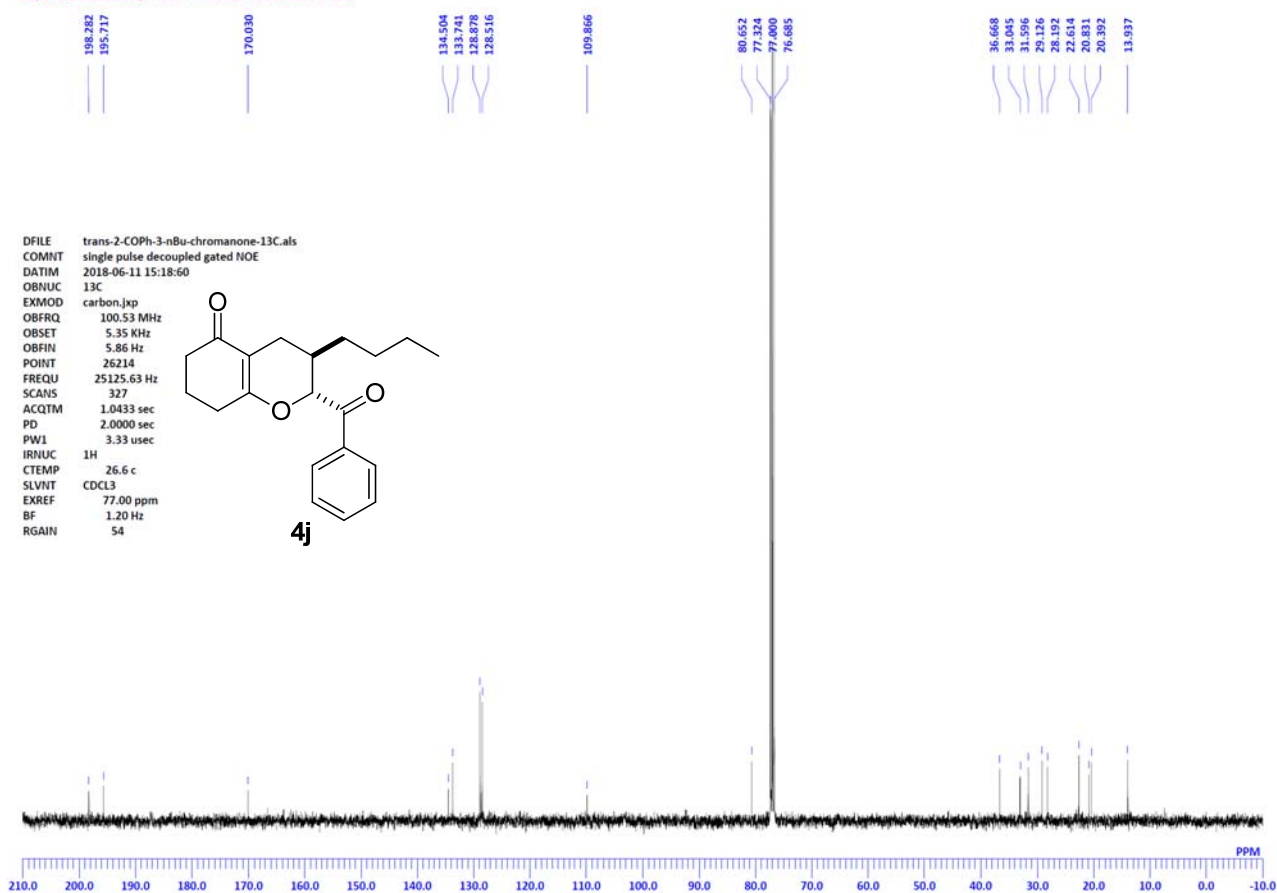

E:\NMRdata chroman\trans-2-COPh-3-Ph-7,7-diMe-chromanone-1H.als

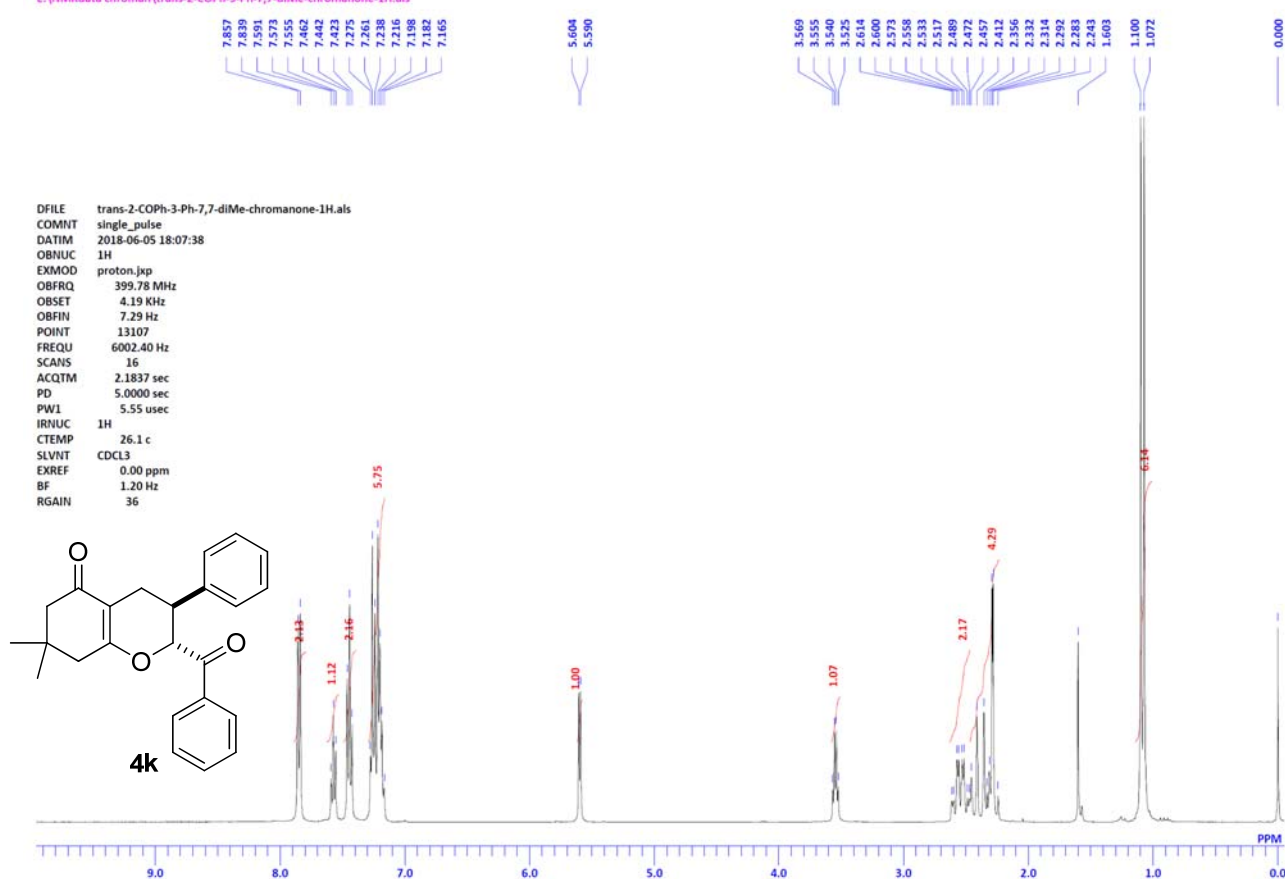

E:\NMRdata chroman\trans-2-COPh-3-Ph-7,7-diMe-chromanone-13C.als

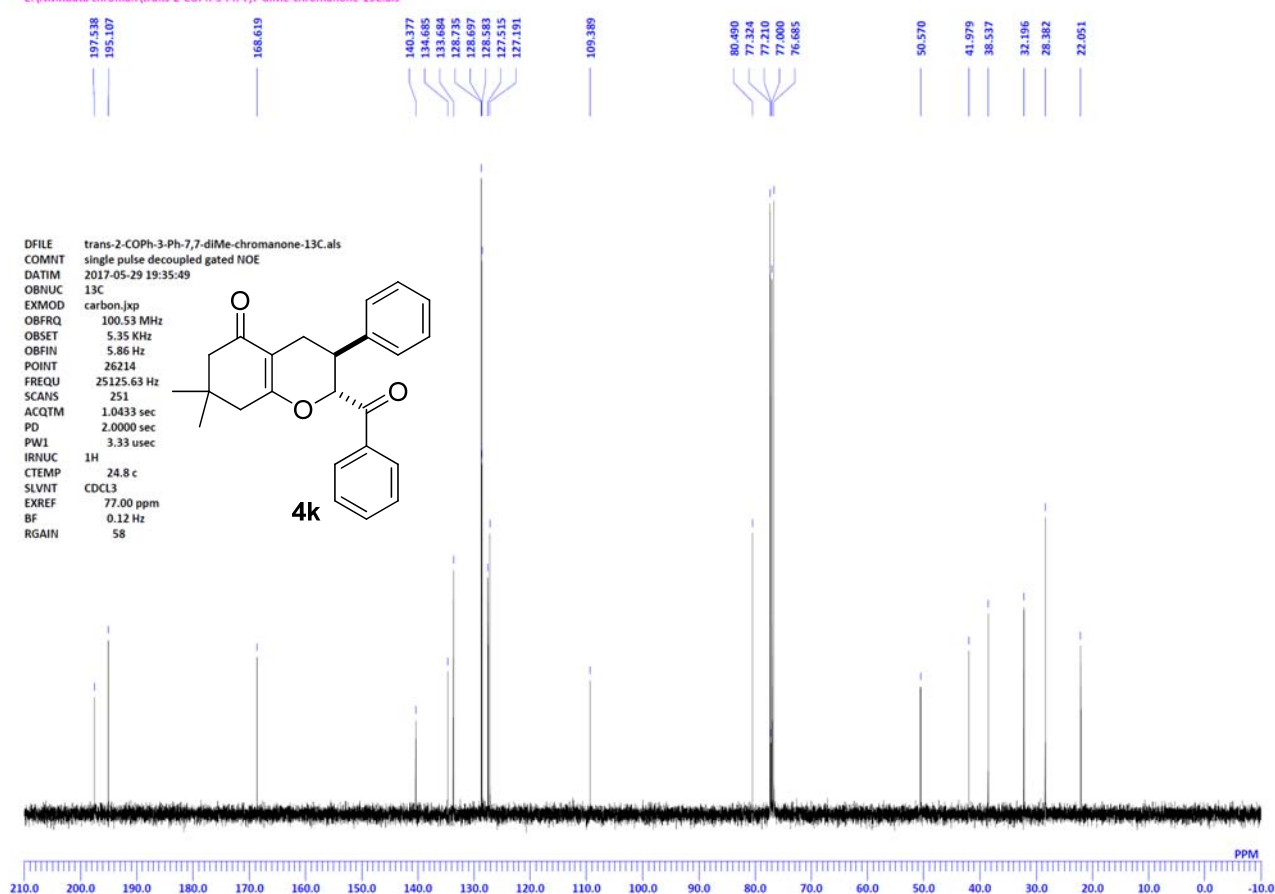



E:\NMRdata chroman\cis-2-COPh-3-Ph-chromanone-1H.als

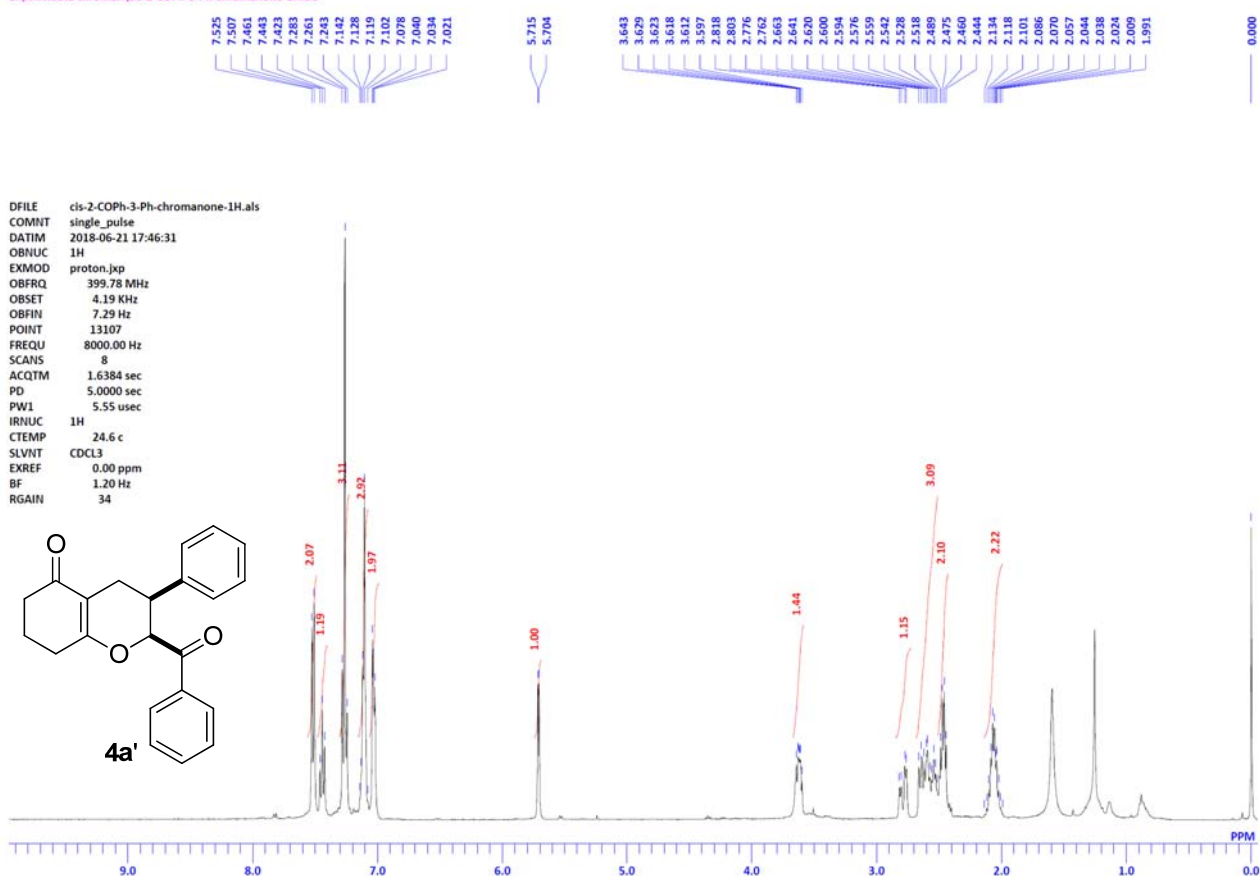

E:\NMRdata chroman\cis-2-COPh-3-Ph-chromanone-13C.als

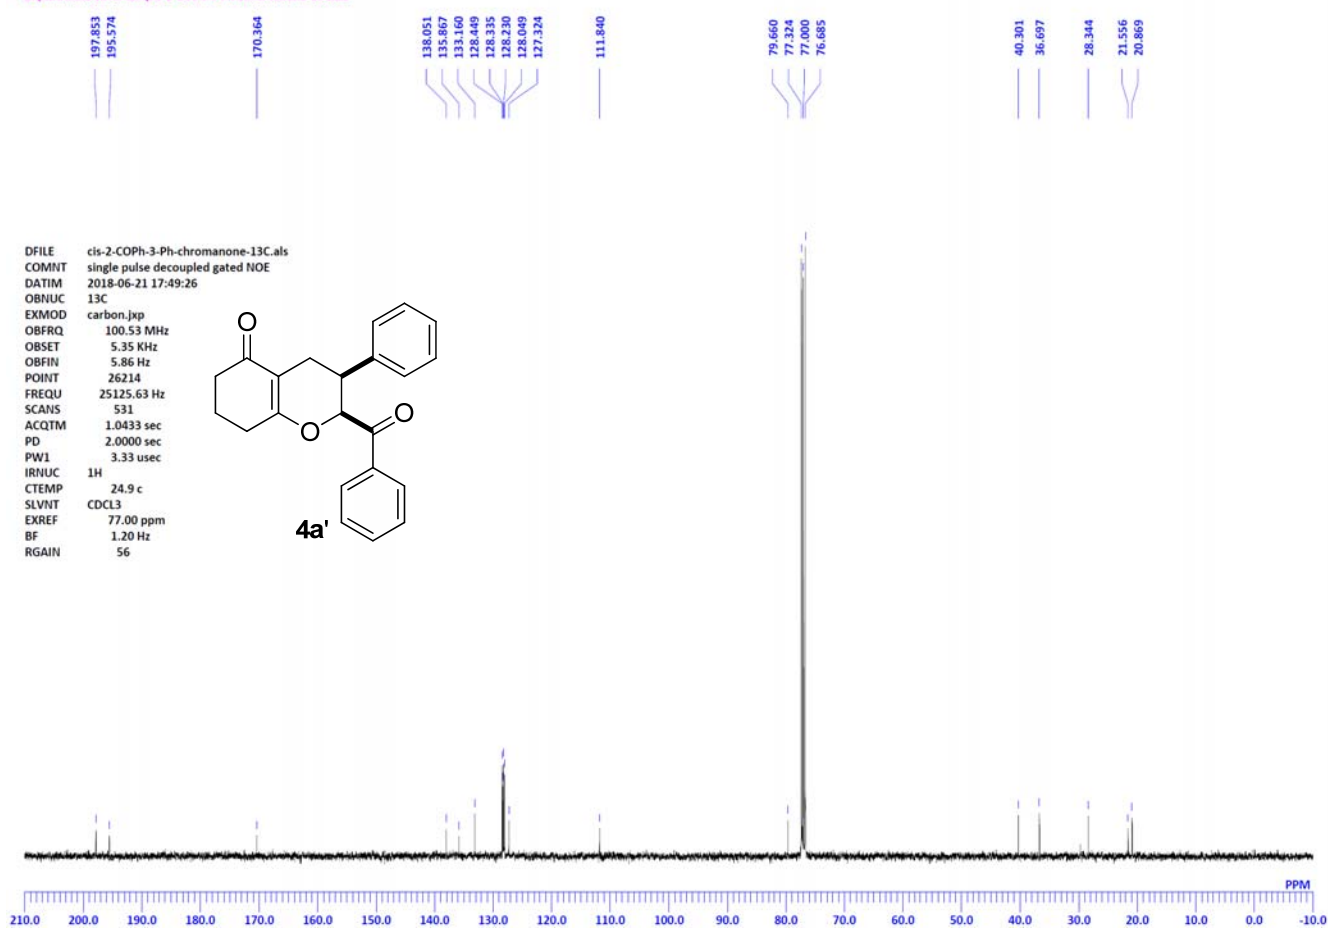

E:\NMRdata chroman\5-OH-chroman-1H.als

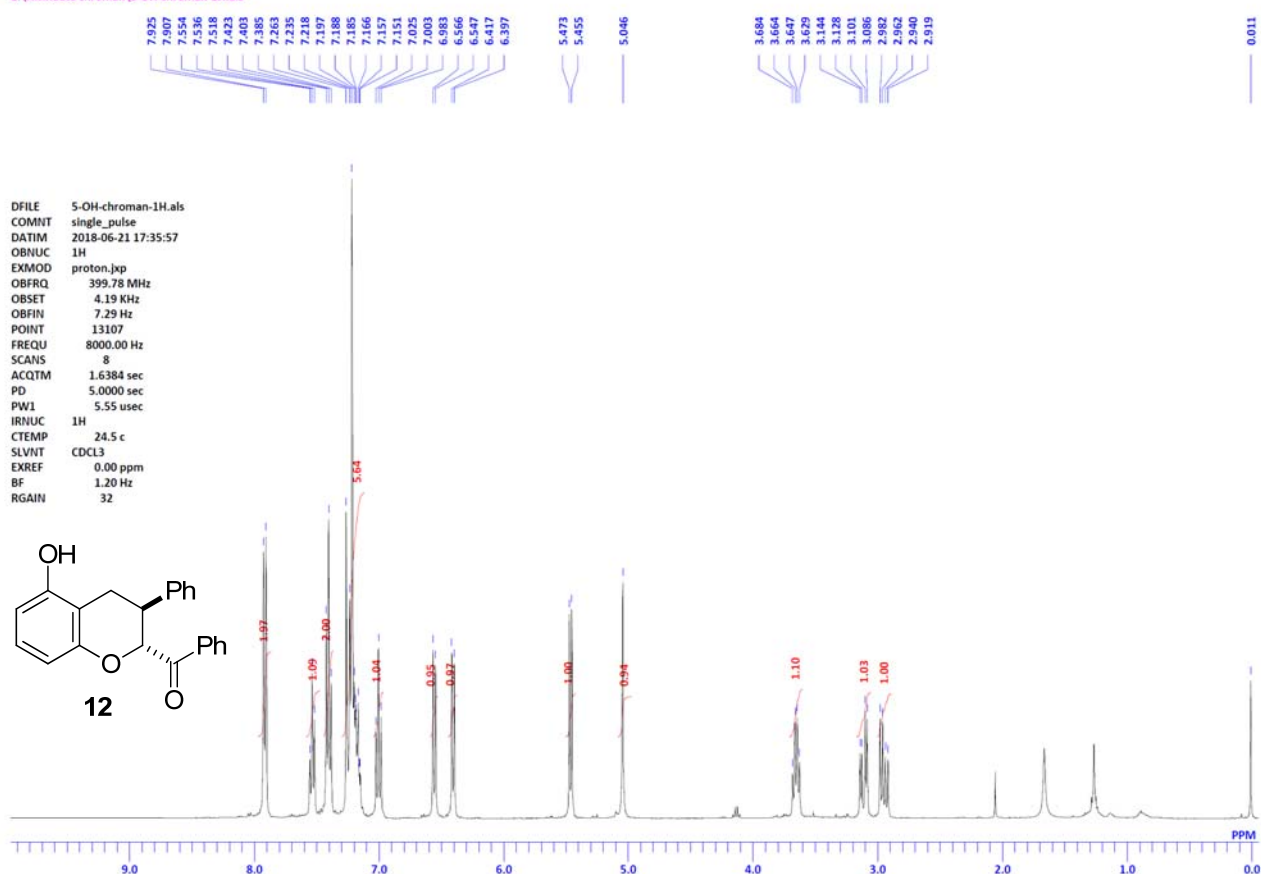

E:\NMRdata chroman\5-OH-chroman-13C.als

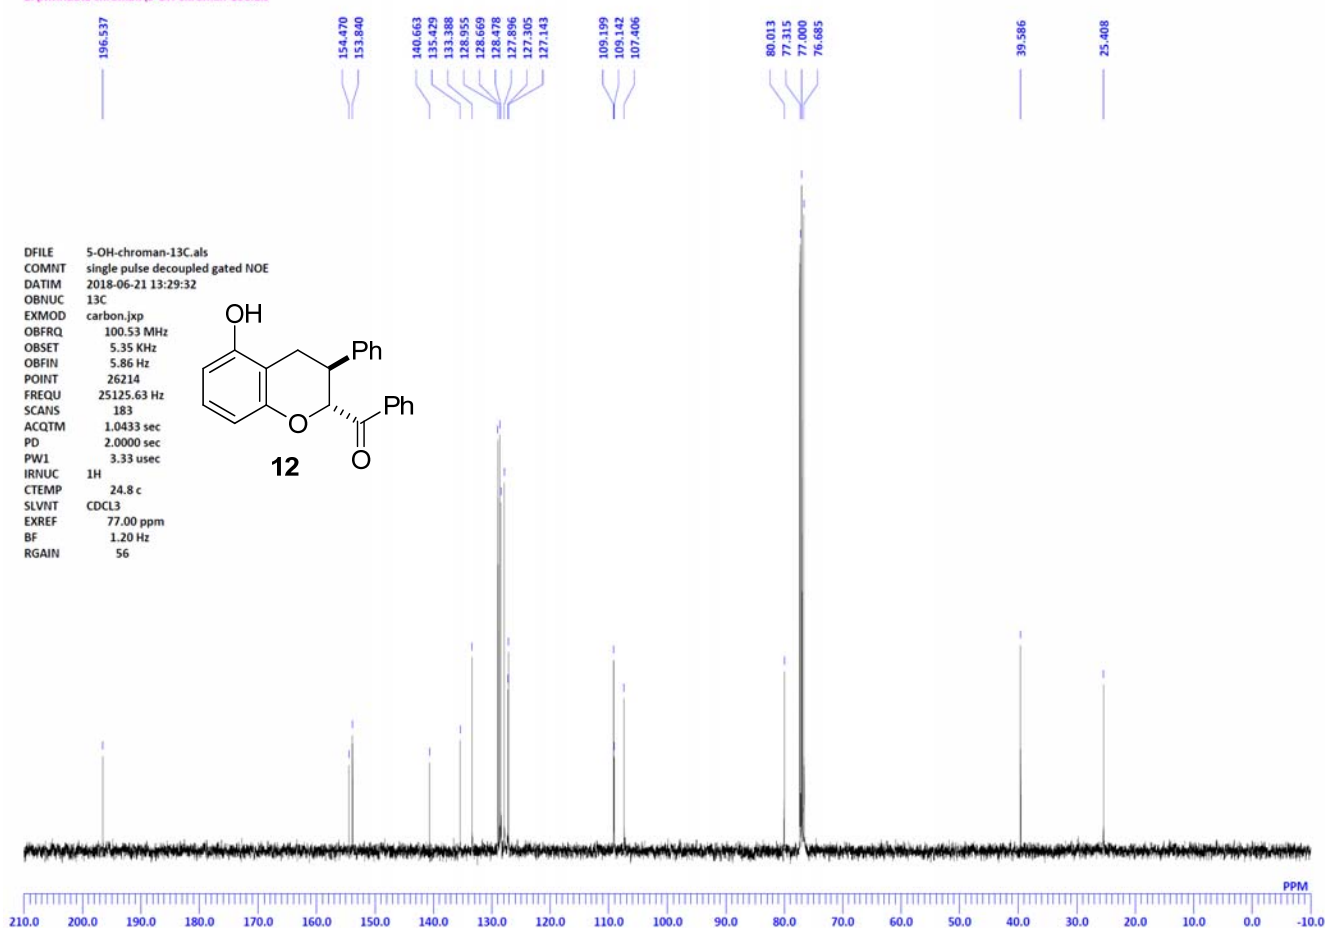

Supplement: c9cc03023a1.pdf [file c9cc03023a1.pdf]
